# Supplementary material
Source: PubMed Central journal article supplement (PMC4917214)
Supplement: NIHMS794959-supplement-2.pdf [file NIHMS794959-supplement-2.pdf]

# The Lysosome and HER3 (ErbB3) Selective Anticancer Agent Kahalalide F: Semisynthetic Modifications and Antifungal Lead-Exploration Studies

## Supporting Information

Abbas Gholipour Shilabin,<sup>1</sup> Noer Kasanah,<sup>1</sup>  
David E. Wedge<sup>2</sup> and Mark T. Hamann<sup>1\*</sup>

<sup>1</sup>*Dept of Pharmacognosy, School of Pharmacy, the University of Mississippi, University, MS 38677*

<sup>2</sup>*ARS, Natural Product Utilization Research Unit, National Center for Natural Products Research, University of Mississippi, University, MS 38677*

### Table of Contents

|                                                                                                                                                                                                            |         |
|------------------------------------------------------------------------------------------------------------------------------------------------------------------------------------------------------------|---------|
| <sup>1</sup> H NMR and <sup>13</sup> C NMR spectra of KF ( <b>1</b> ) in DMSO- <i>d</i> <sub>6</sub> at room temperature at 10 mg/180 μL.                                                                  | S2-S3   |
| <sup>1</sup> H NMR, <sup>13</sup> C NMR and DEPT 135° spectra of compound <b>3</b> in DMSO- <i>d</i> <sub>6</sub> at room temperature at 10 mg/180 μL.                                                     | S4-S6   |
| <sup>1</sup> H NMR and DEPT 135° spectra of KF-analogs <b>4</b> , <b>5</b> , <b>7</b> , <b>8</b> , <b>10</b> , <b>11</b> and <b>16</b> in DMSO- <i>d</i> <sub>6</sub> at room temperature at 10 mg/180 μL. | S7-S20  |
| Activity data (Molar) of 60 NCI cell lines for 4-Fluoro-benzylamino-KF ( <b>5</b> )                                                                                                                        | S21-S24 |
| Activity data (Molar) of 60 NCI cell lines for 4-Pyridinyl-methylamino-KF ( <b>7</b> )                                                                                                                     | S25-S28 |
| Activity data (Molar) of 60 NCI cell lines for 2-Thienyl-methylamino-KF ( <b>8</b> )                                                                                                                       | S29-S32 |
| Activity data (Molar) of 60 NCI cell lines for DEAC-KF-amide ( <b>16</b> )                                                                                                                                 | S33-S36 |
| Fluorescence images                                                                                                                                                                                        | S37     |
| Bioautograms                                                                                                                                                                                               | S38-S40 |

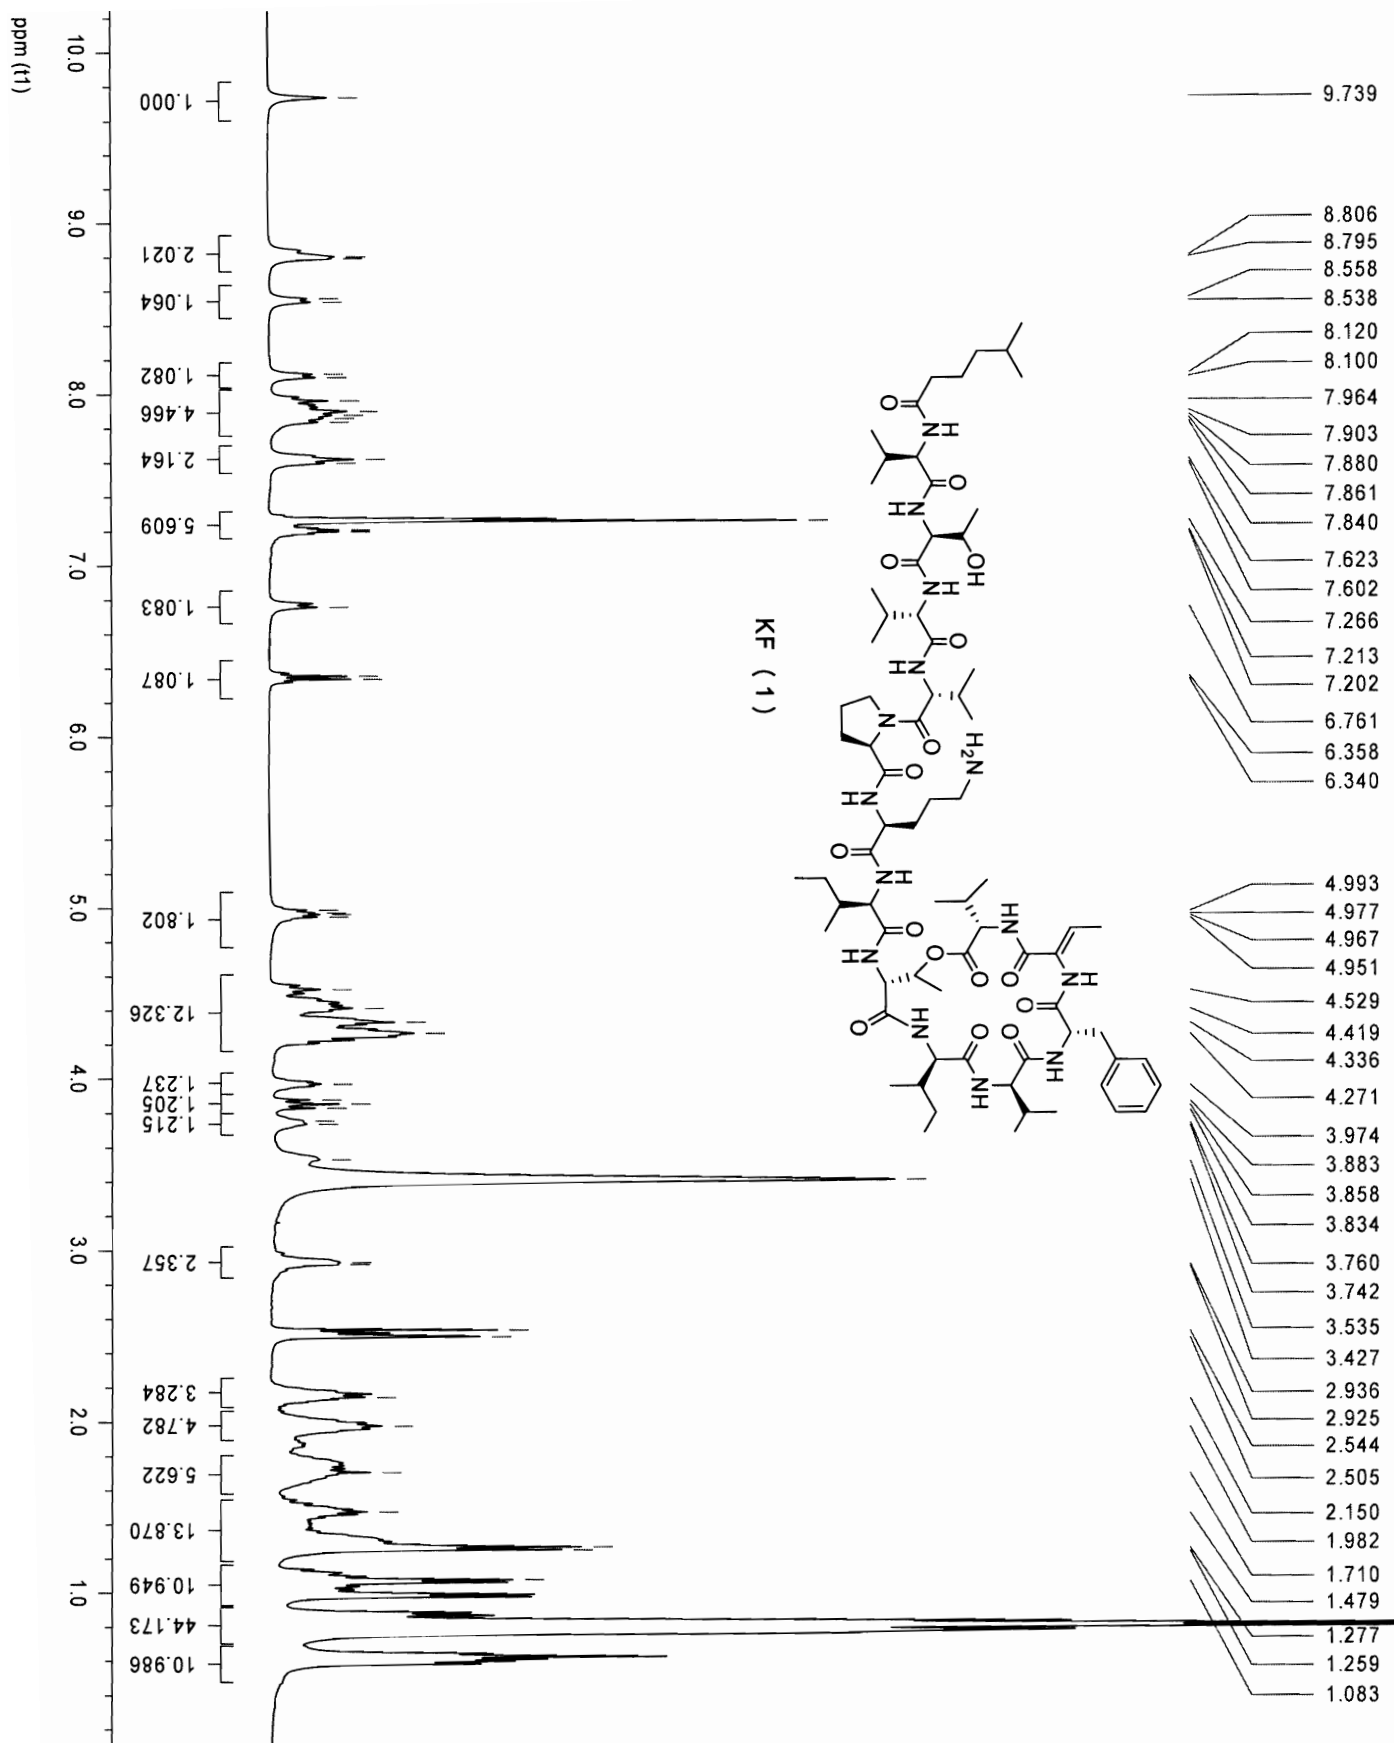

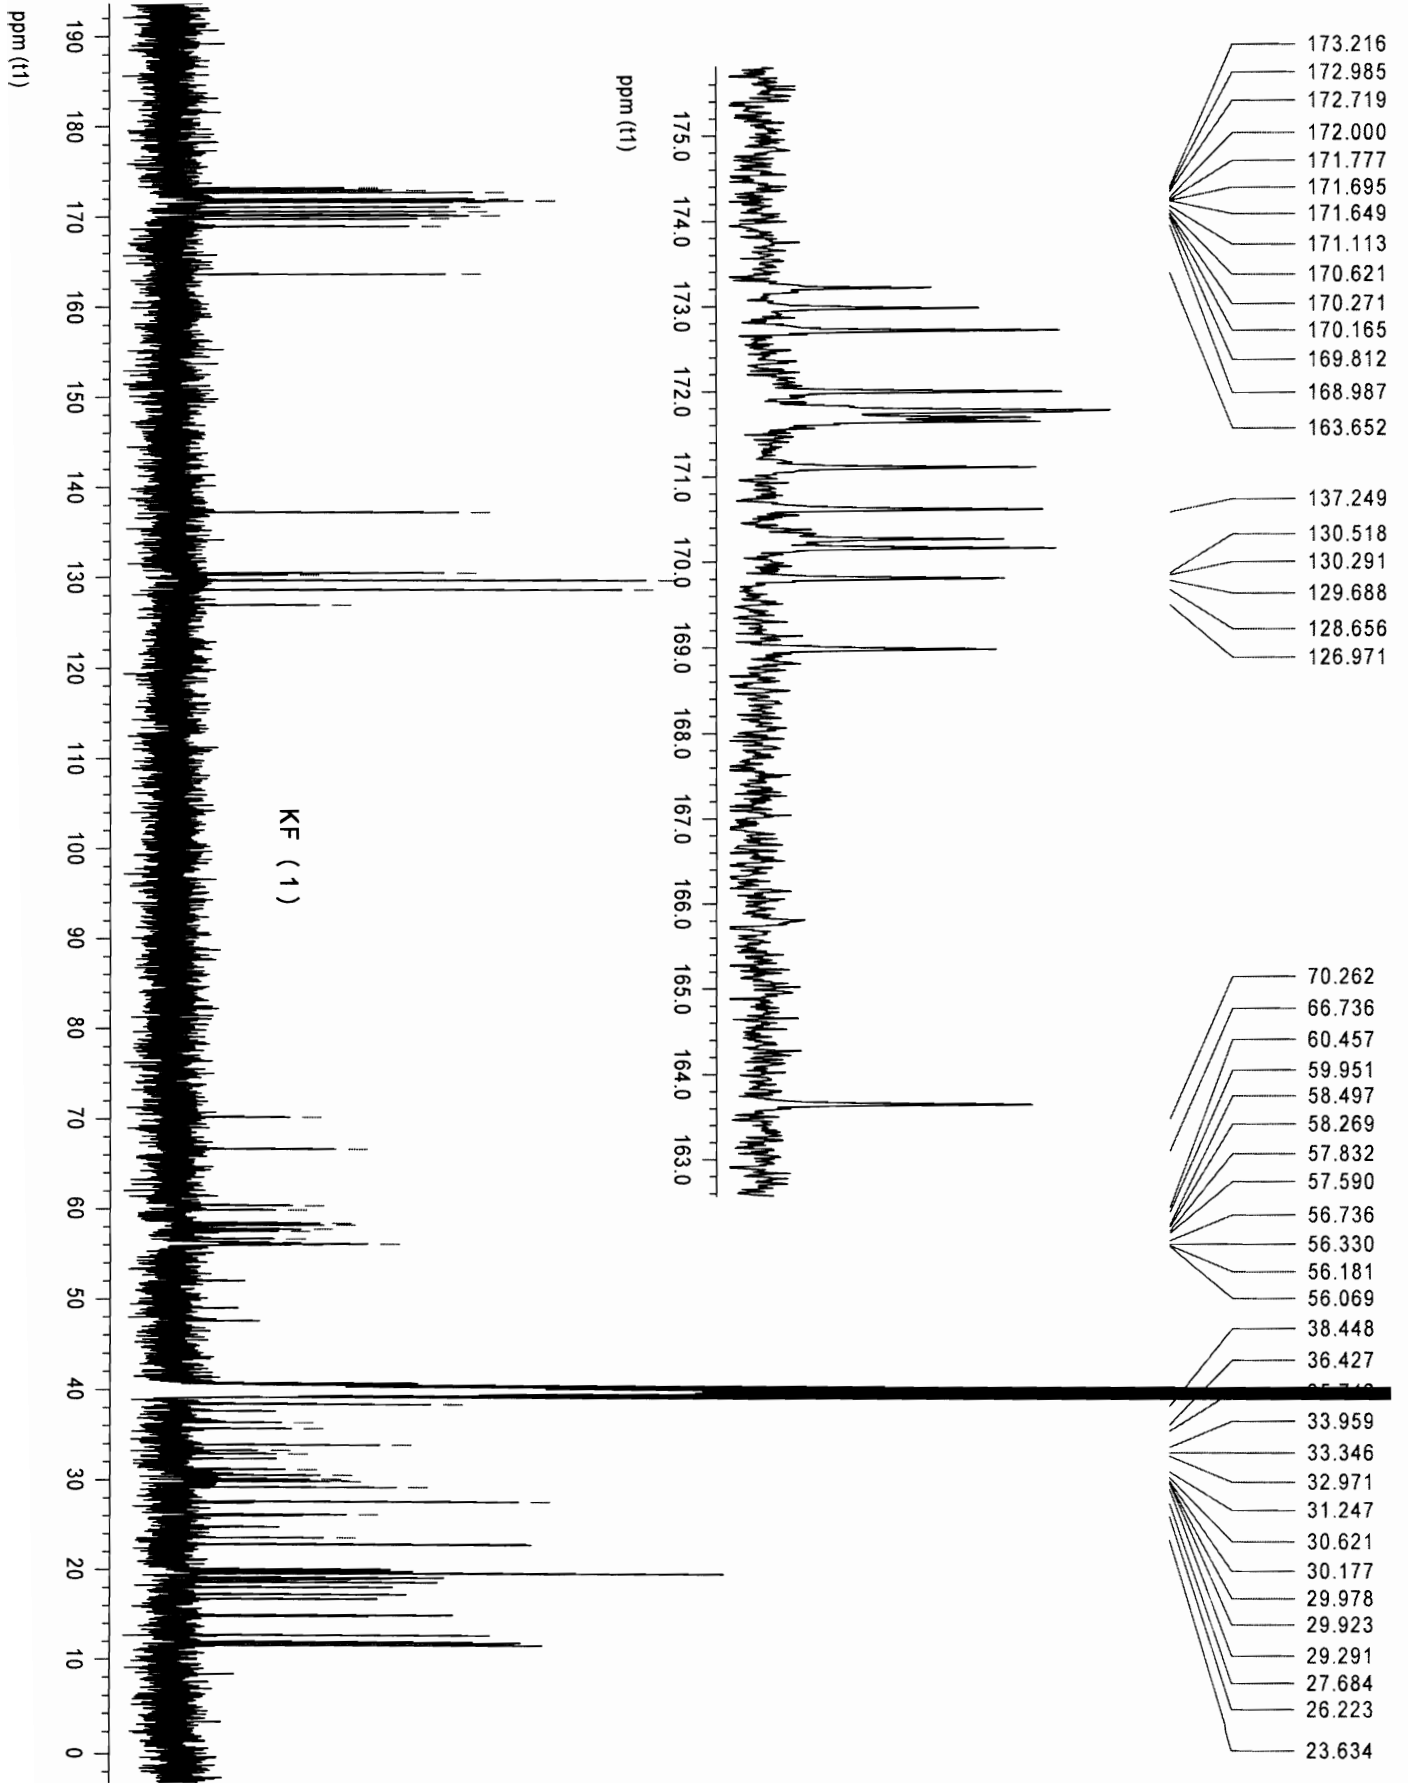

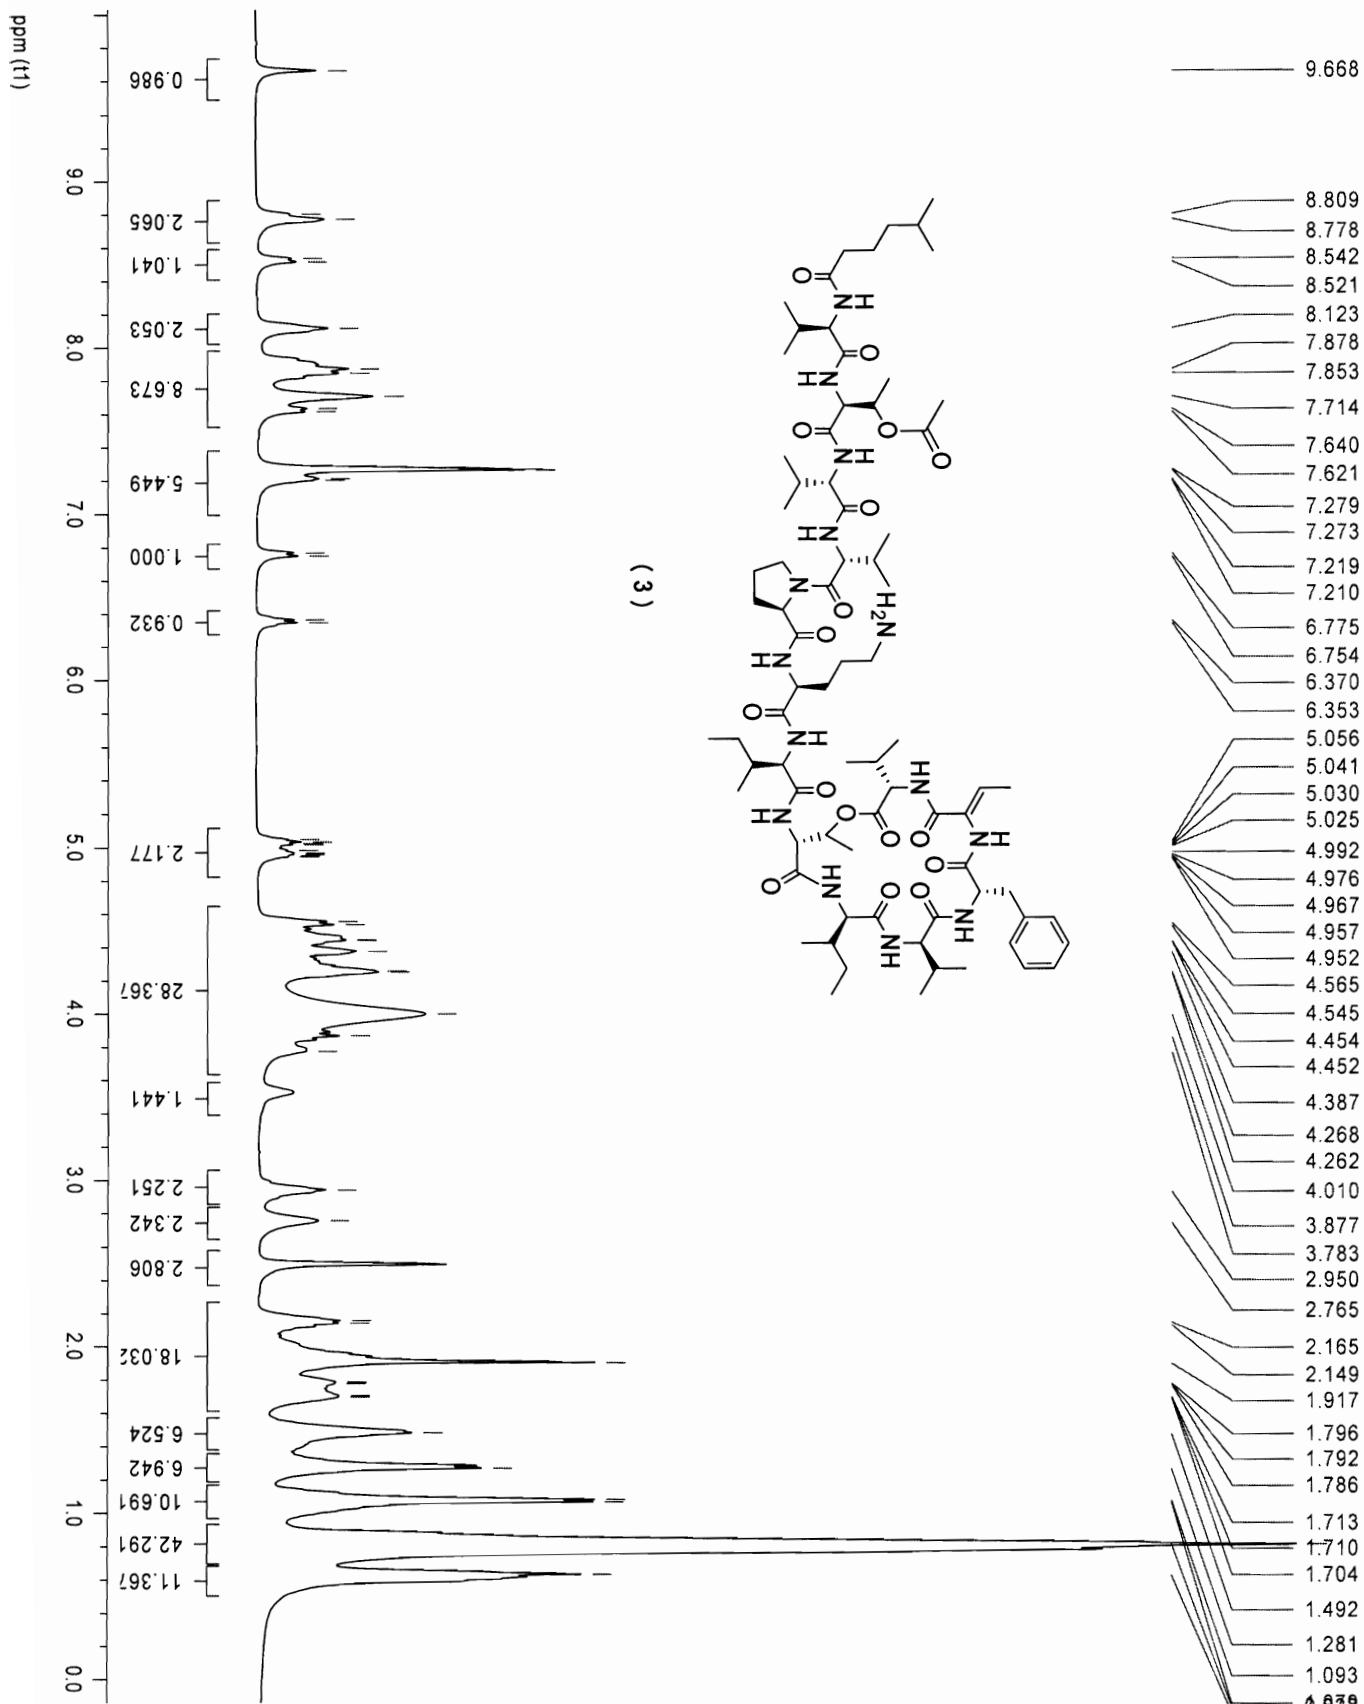

(3)

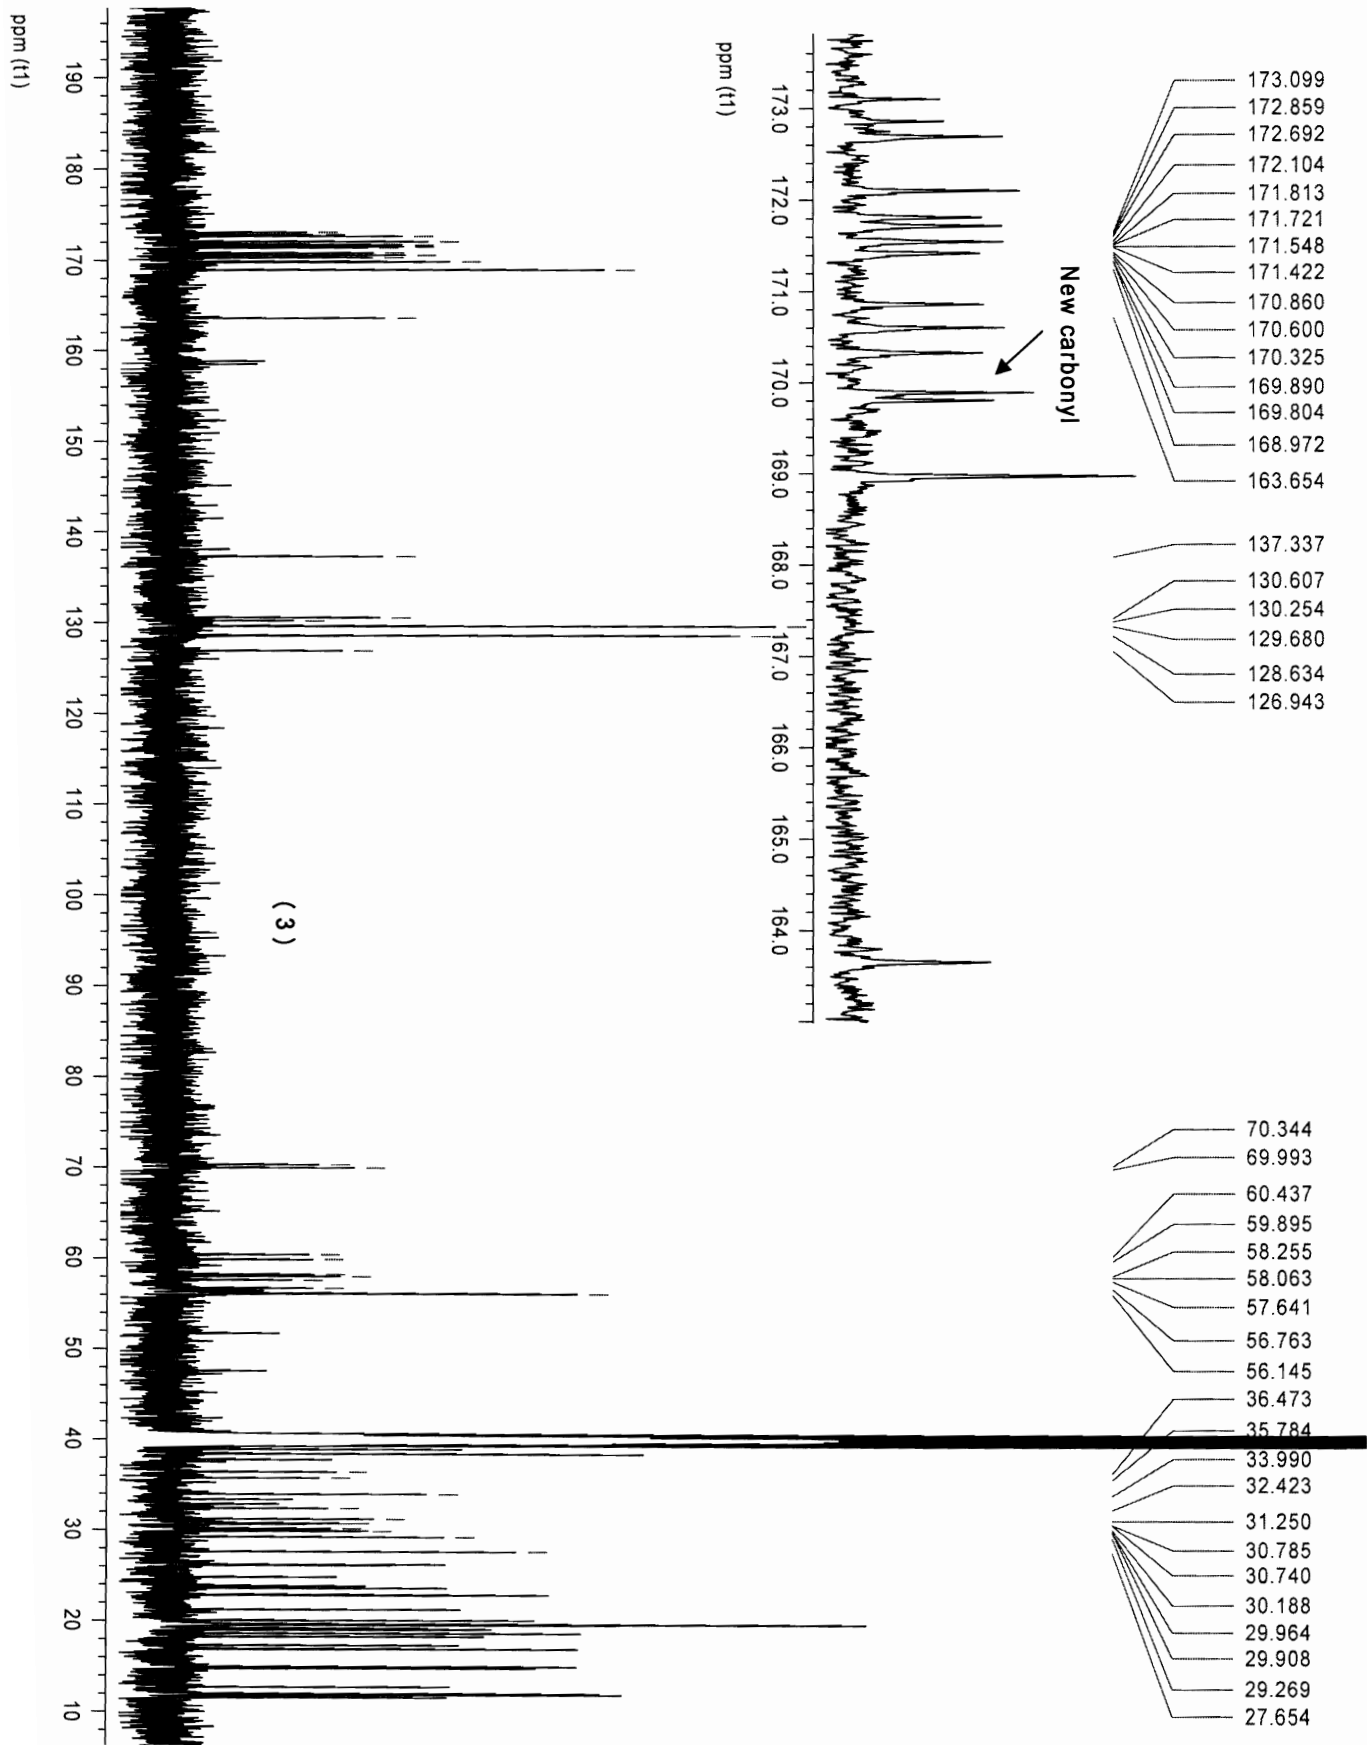

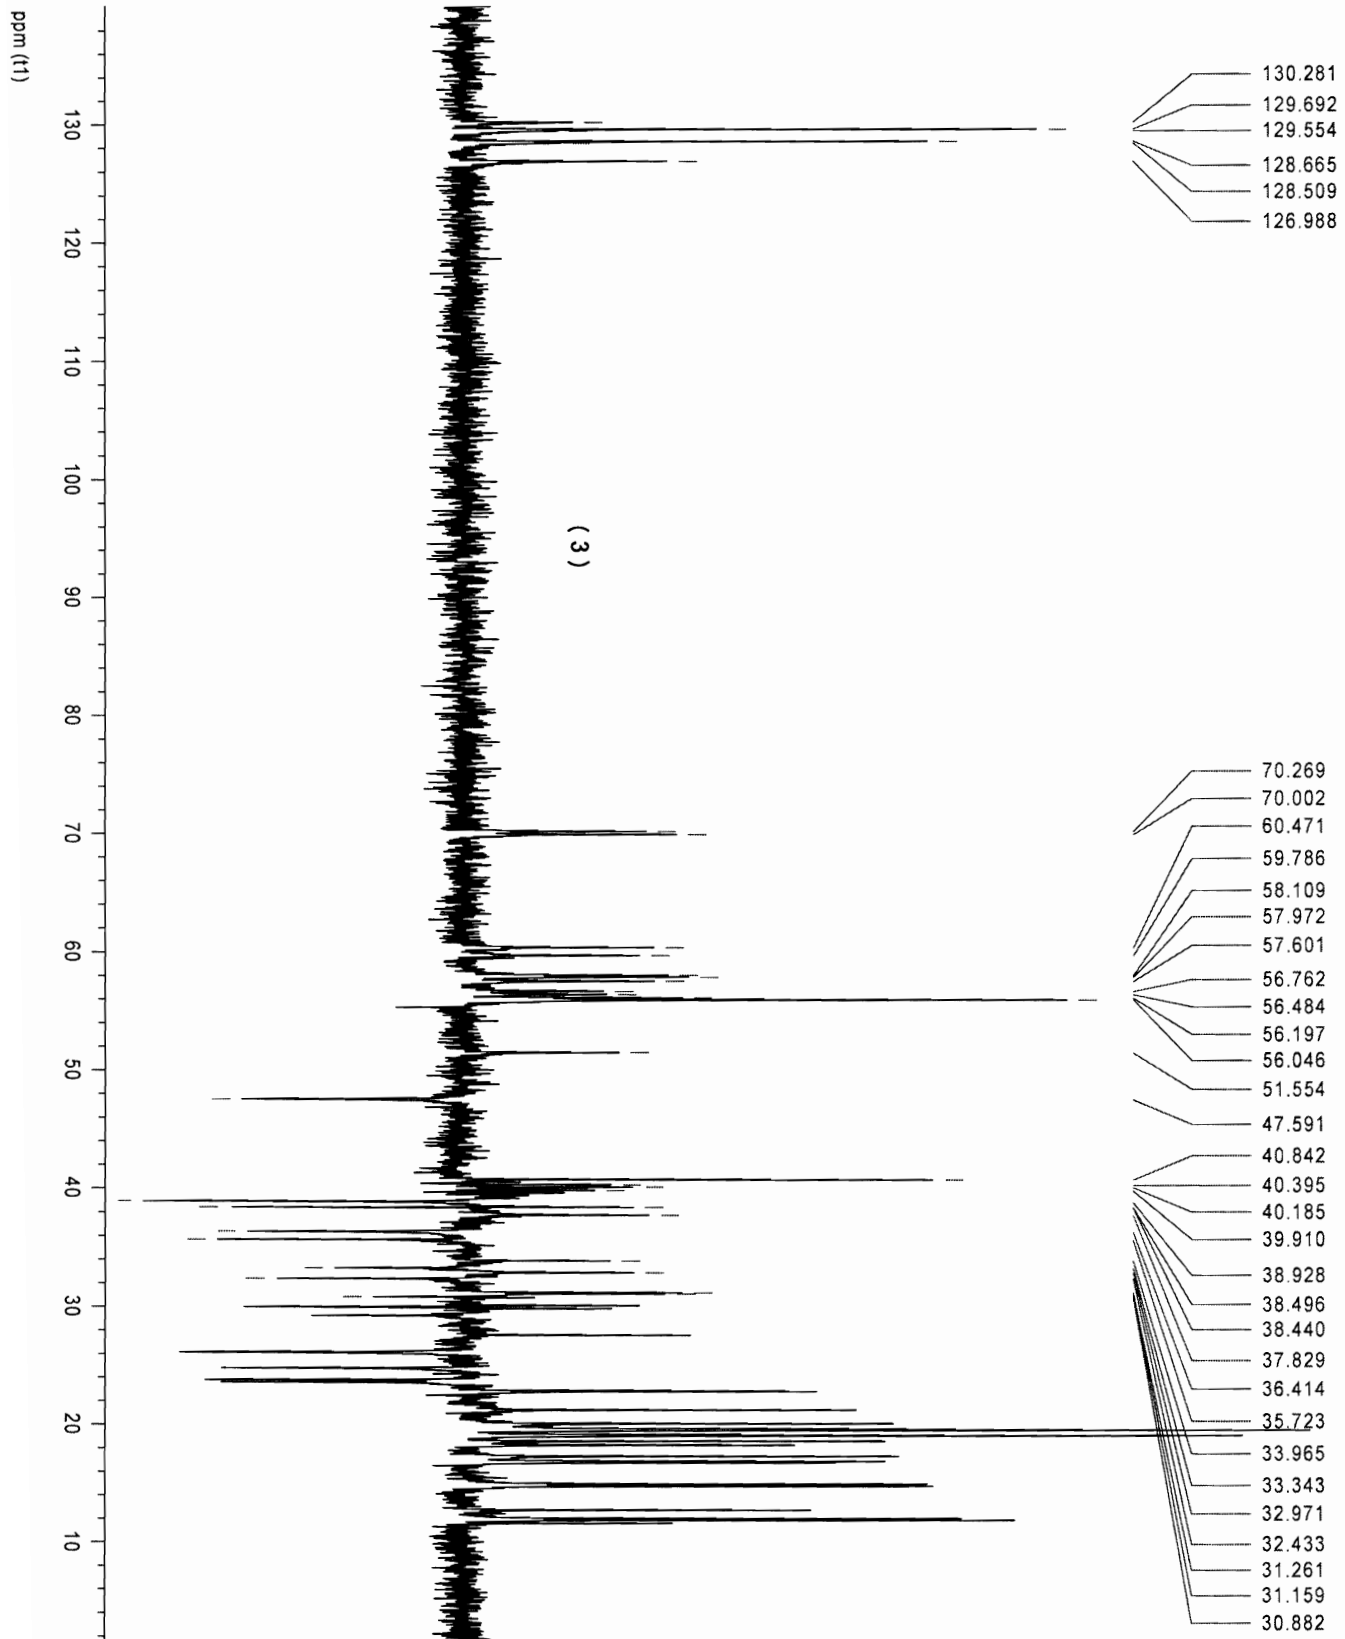

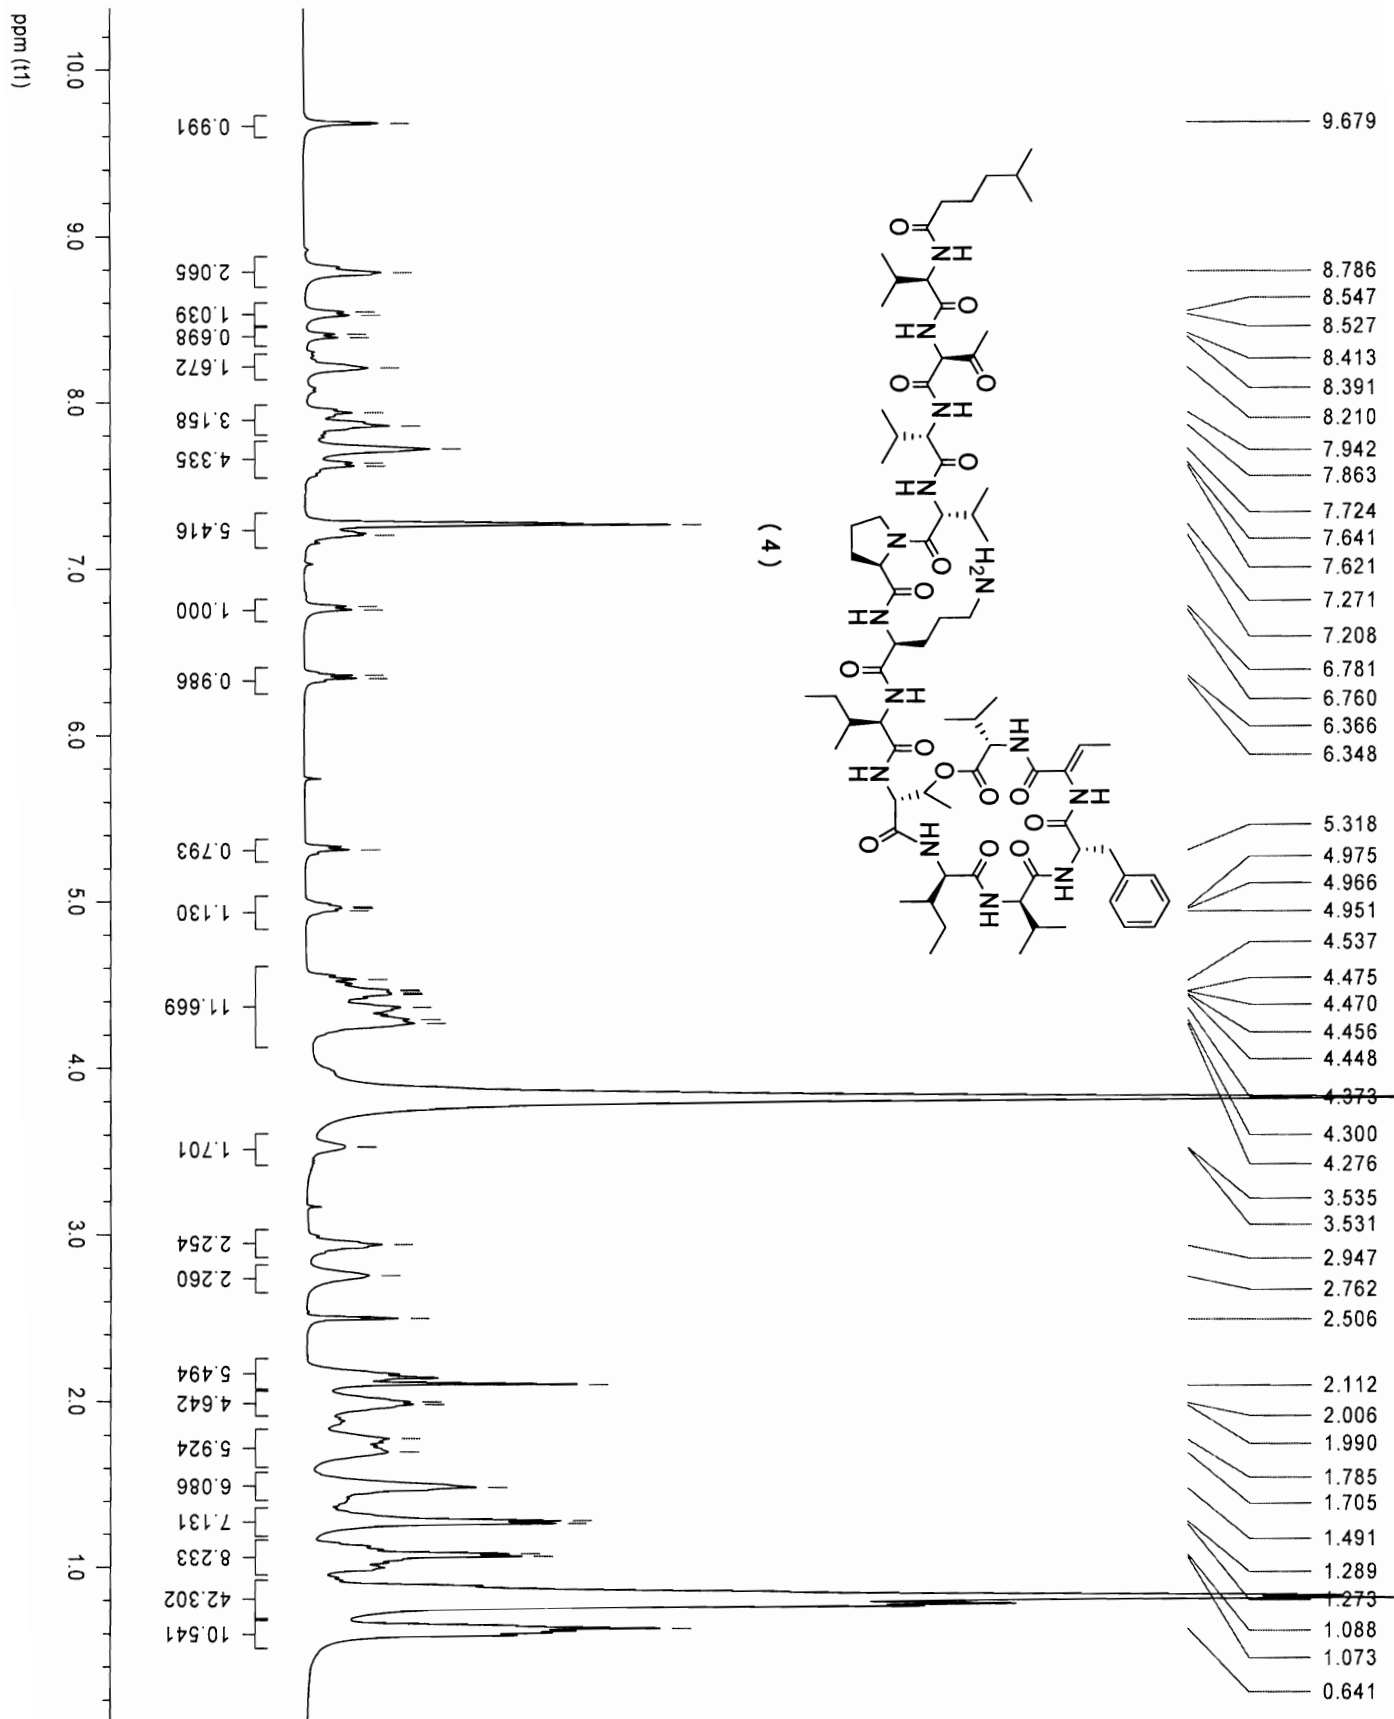

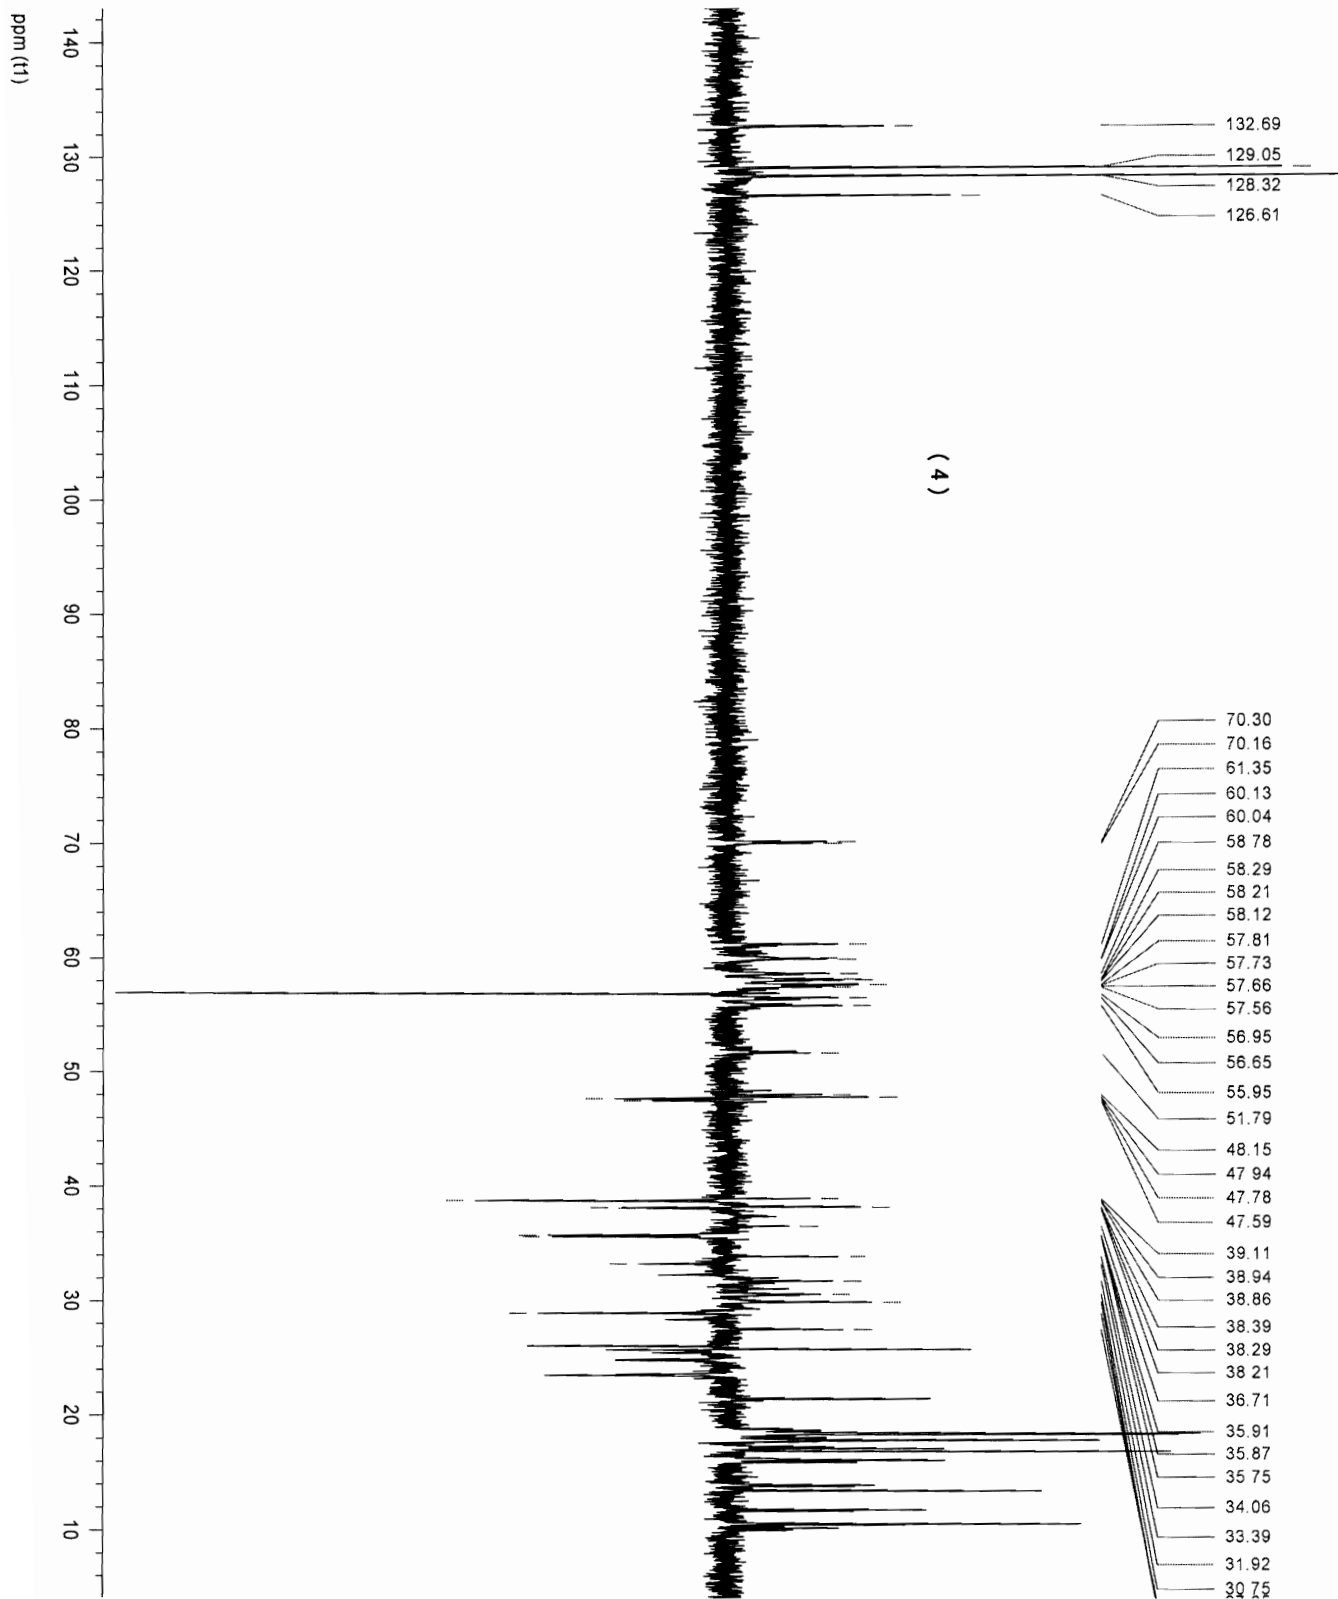



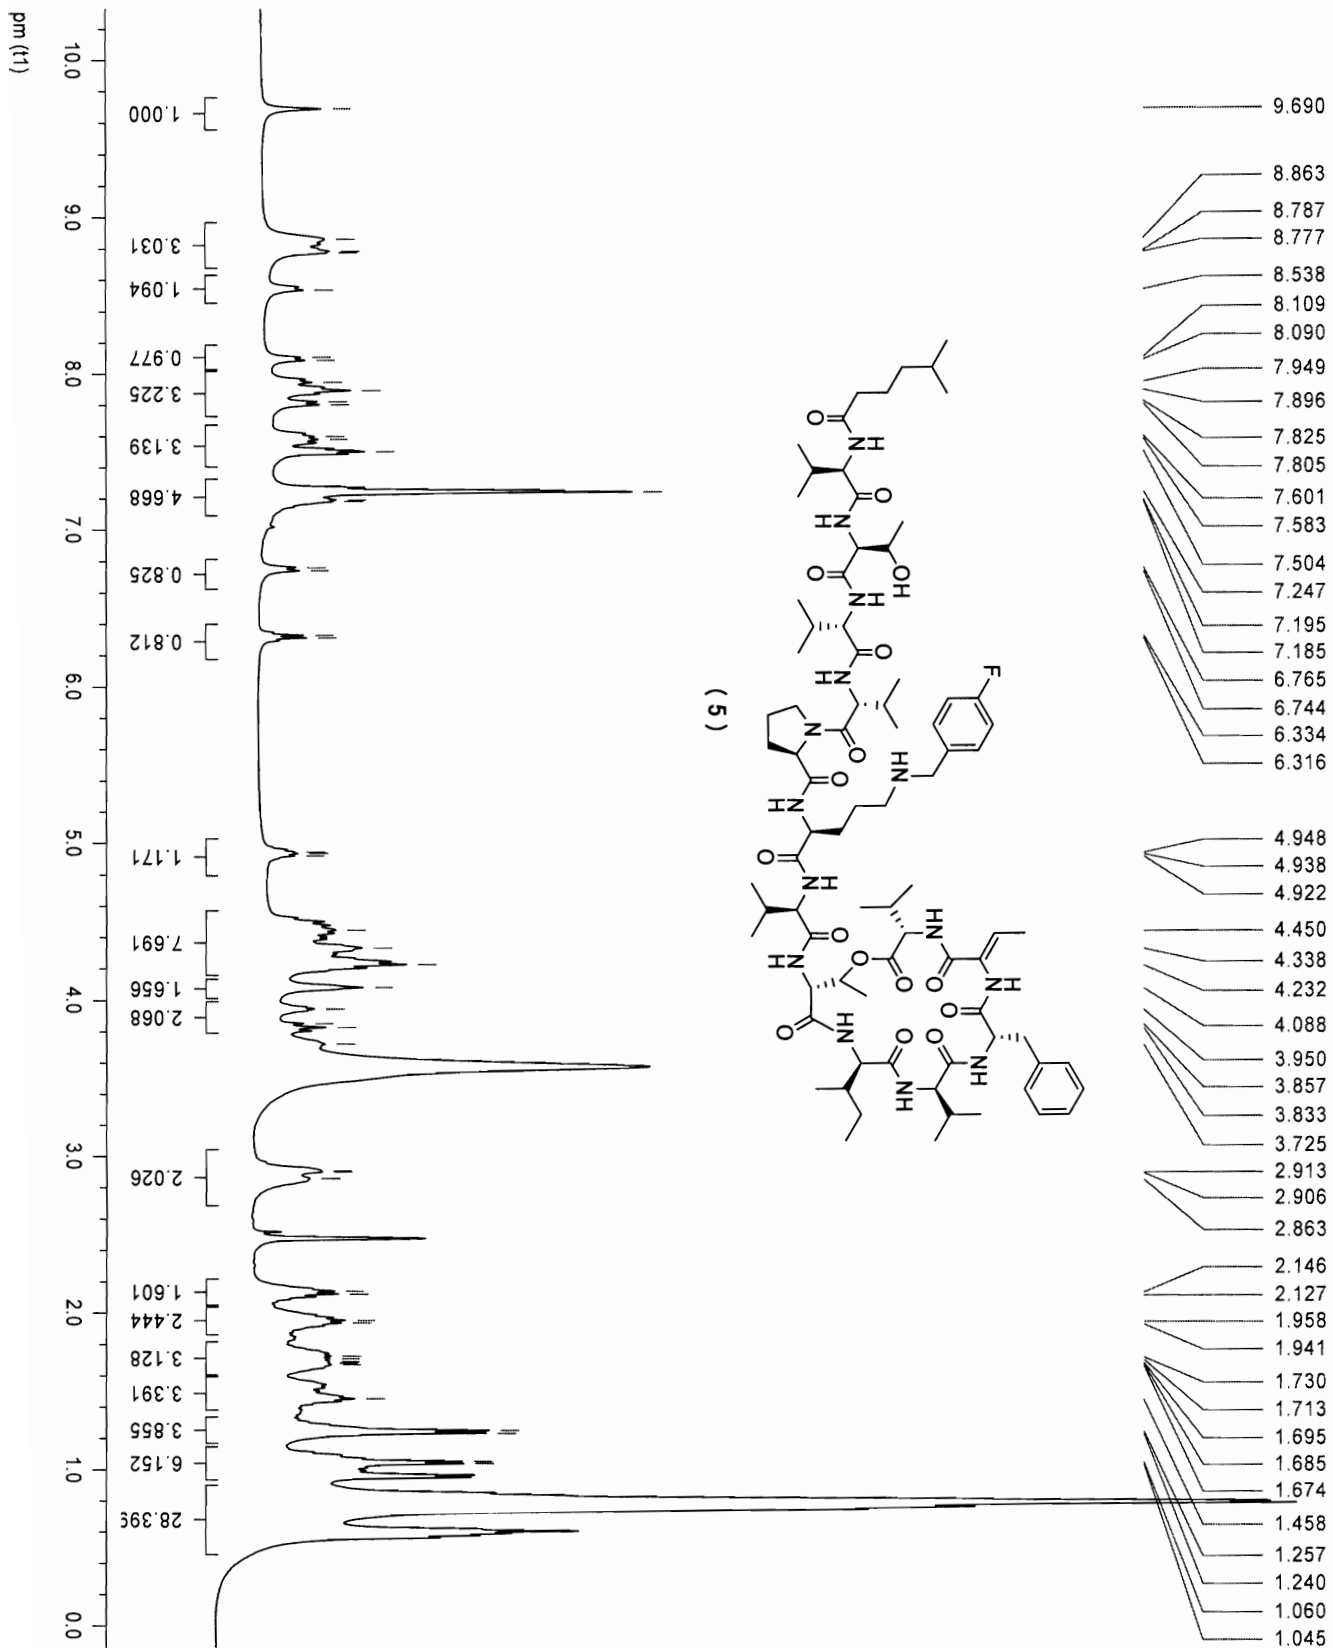

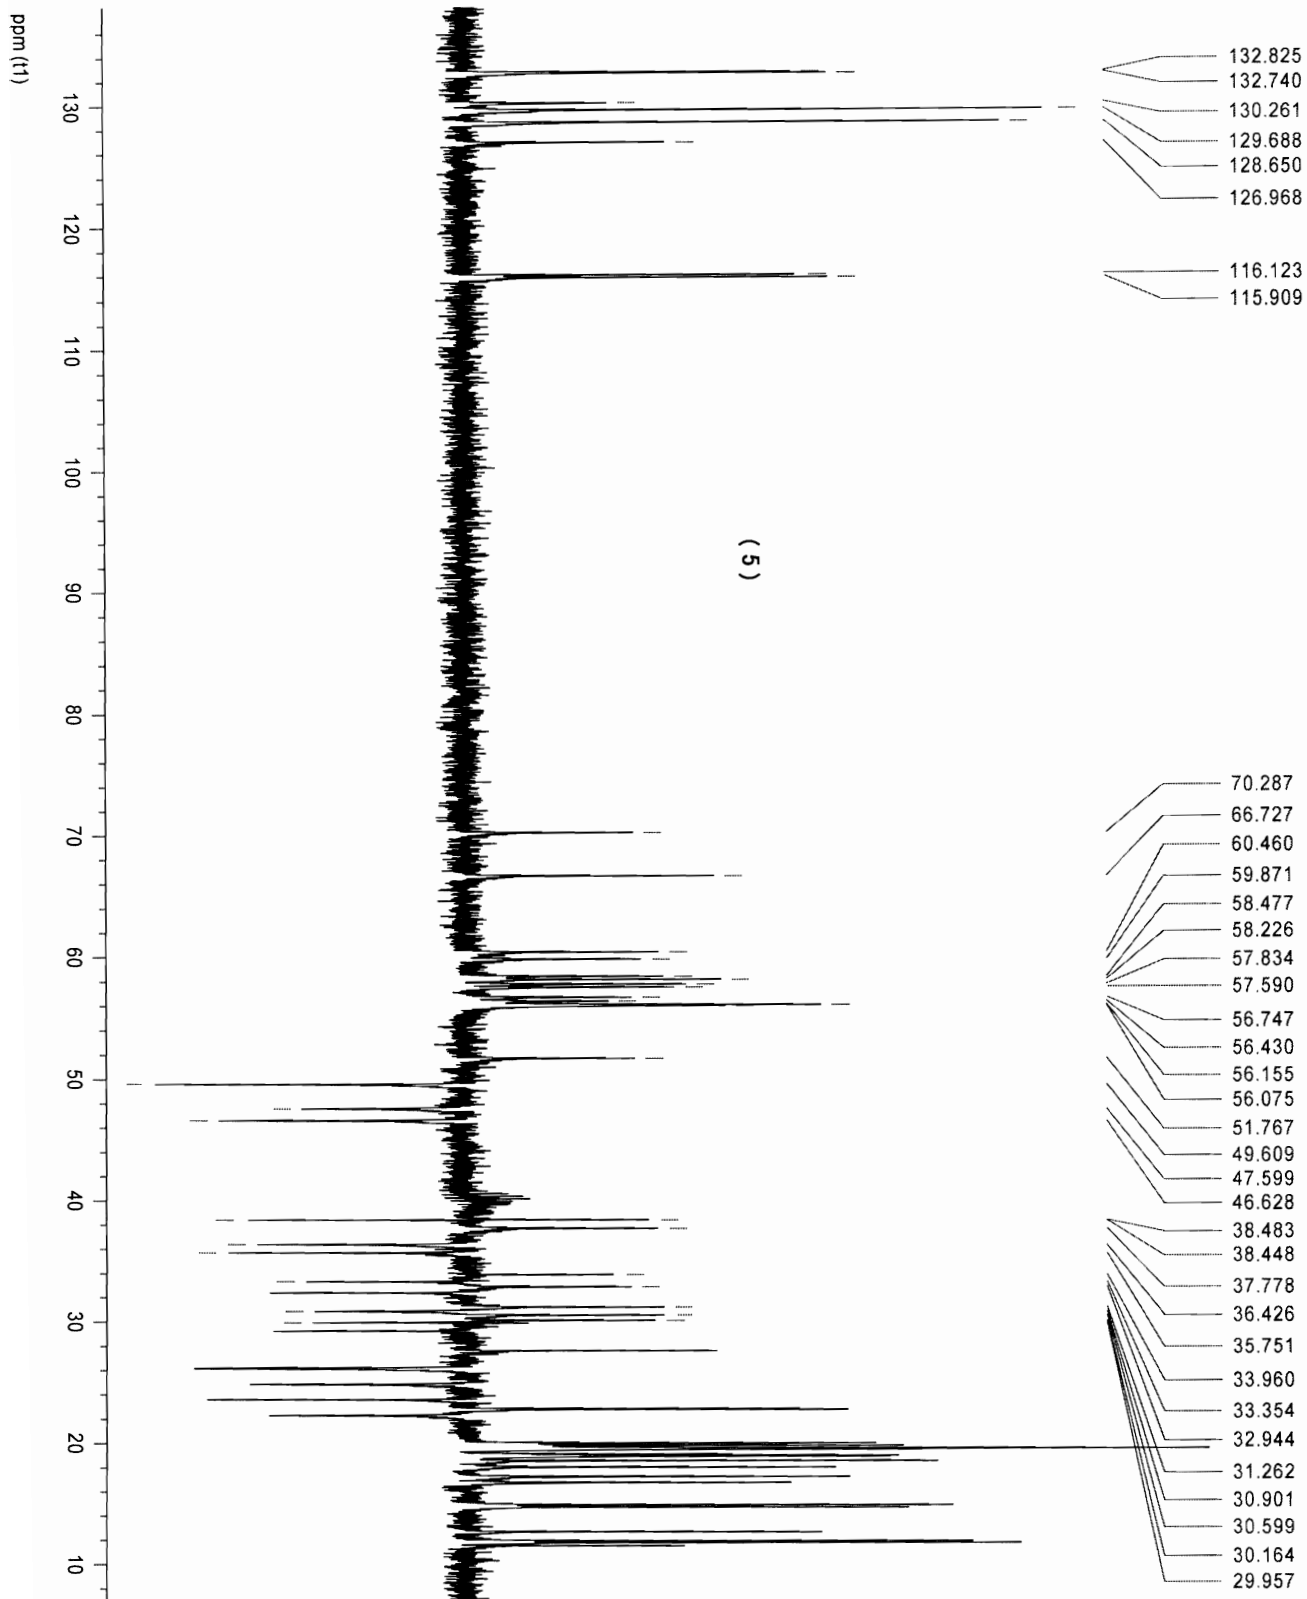



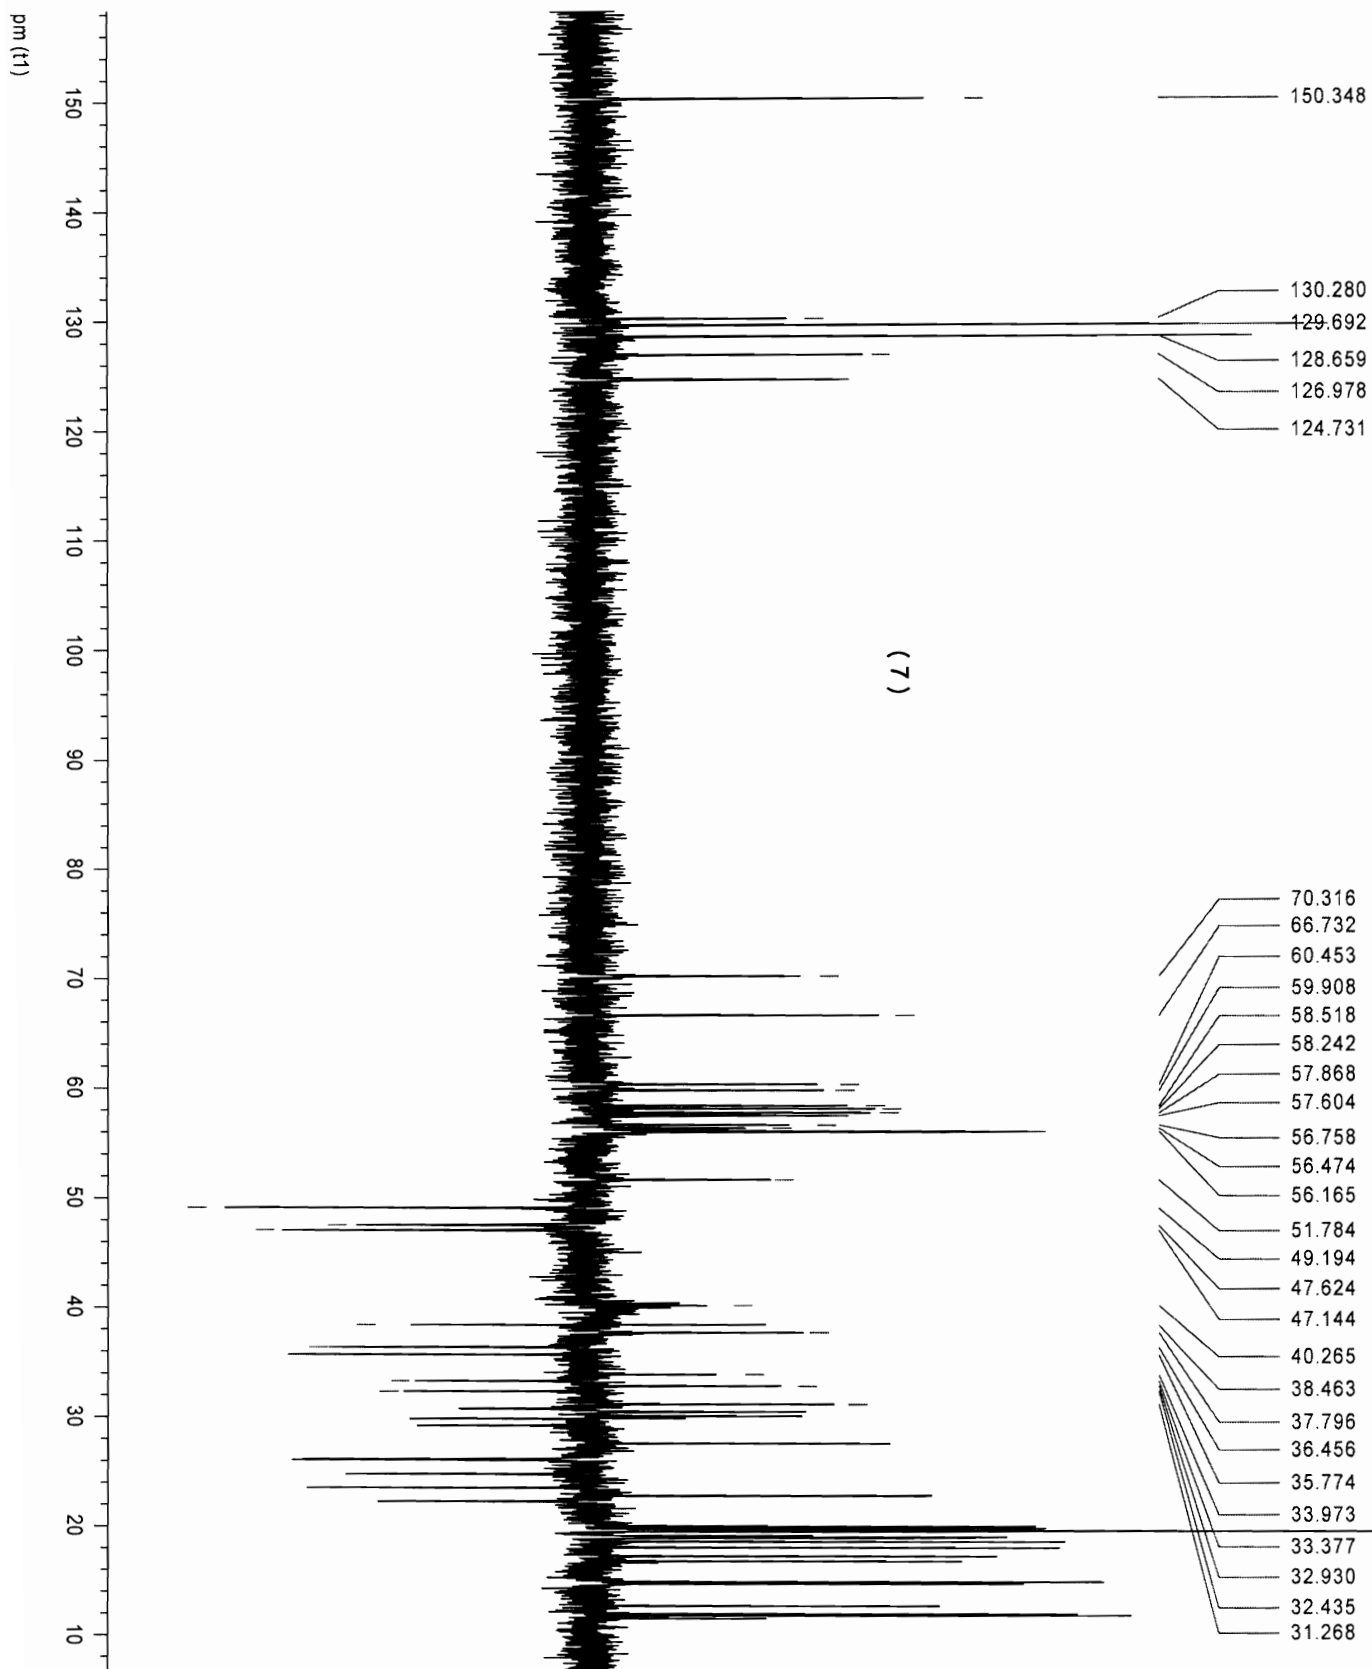

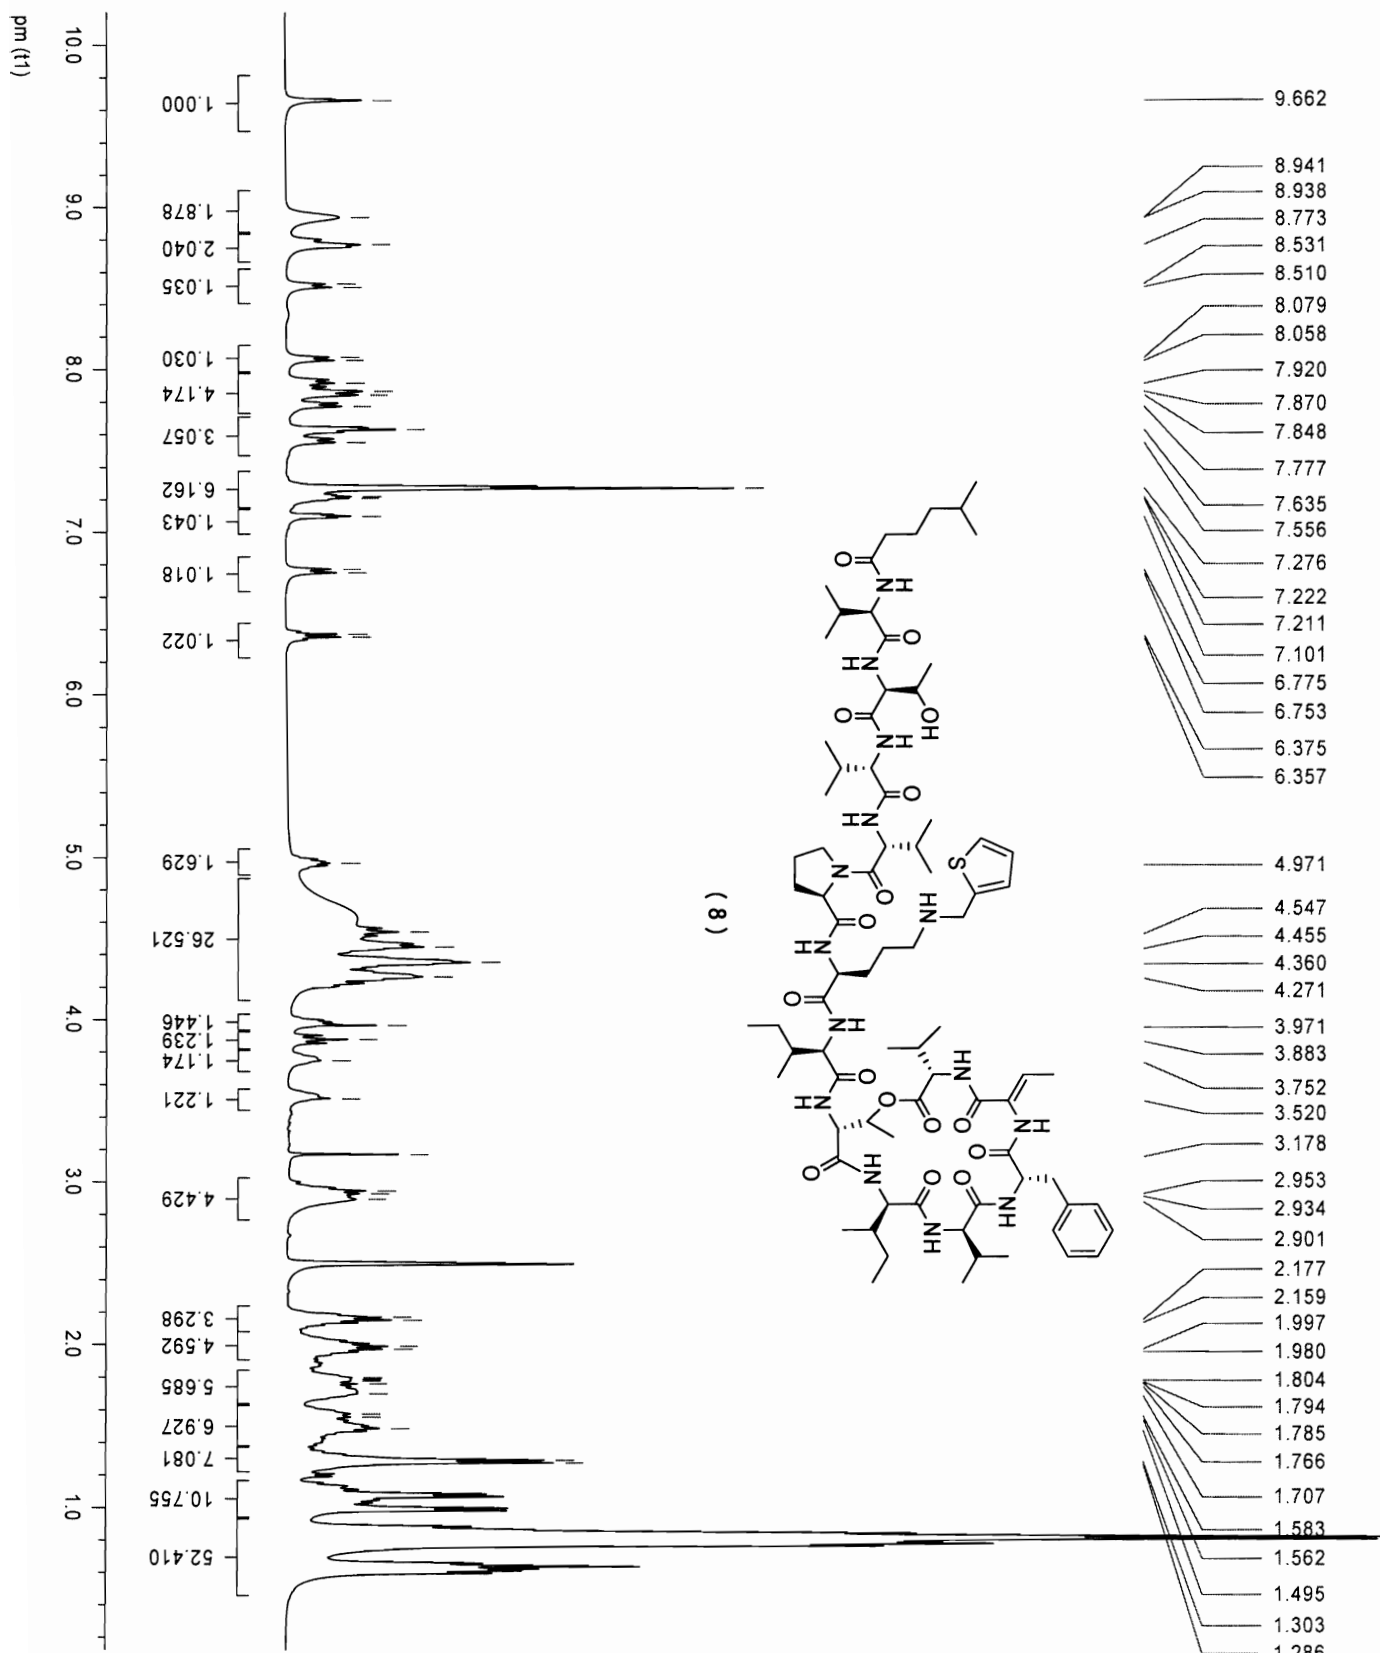

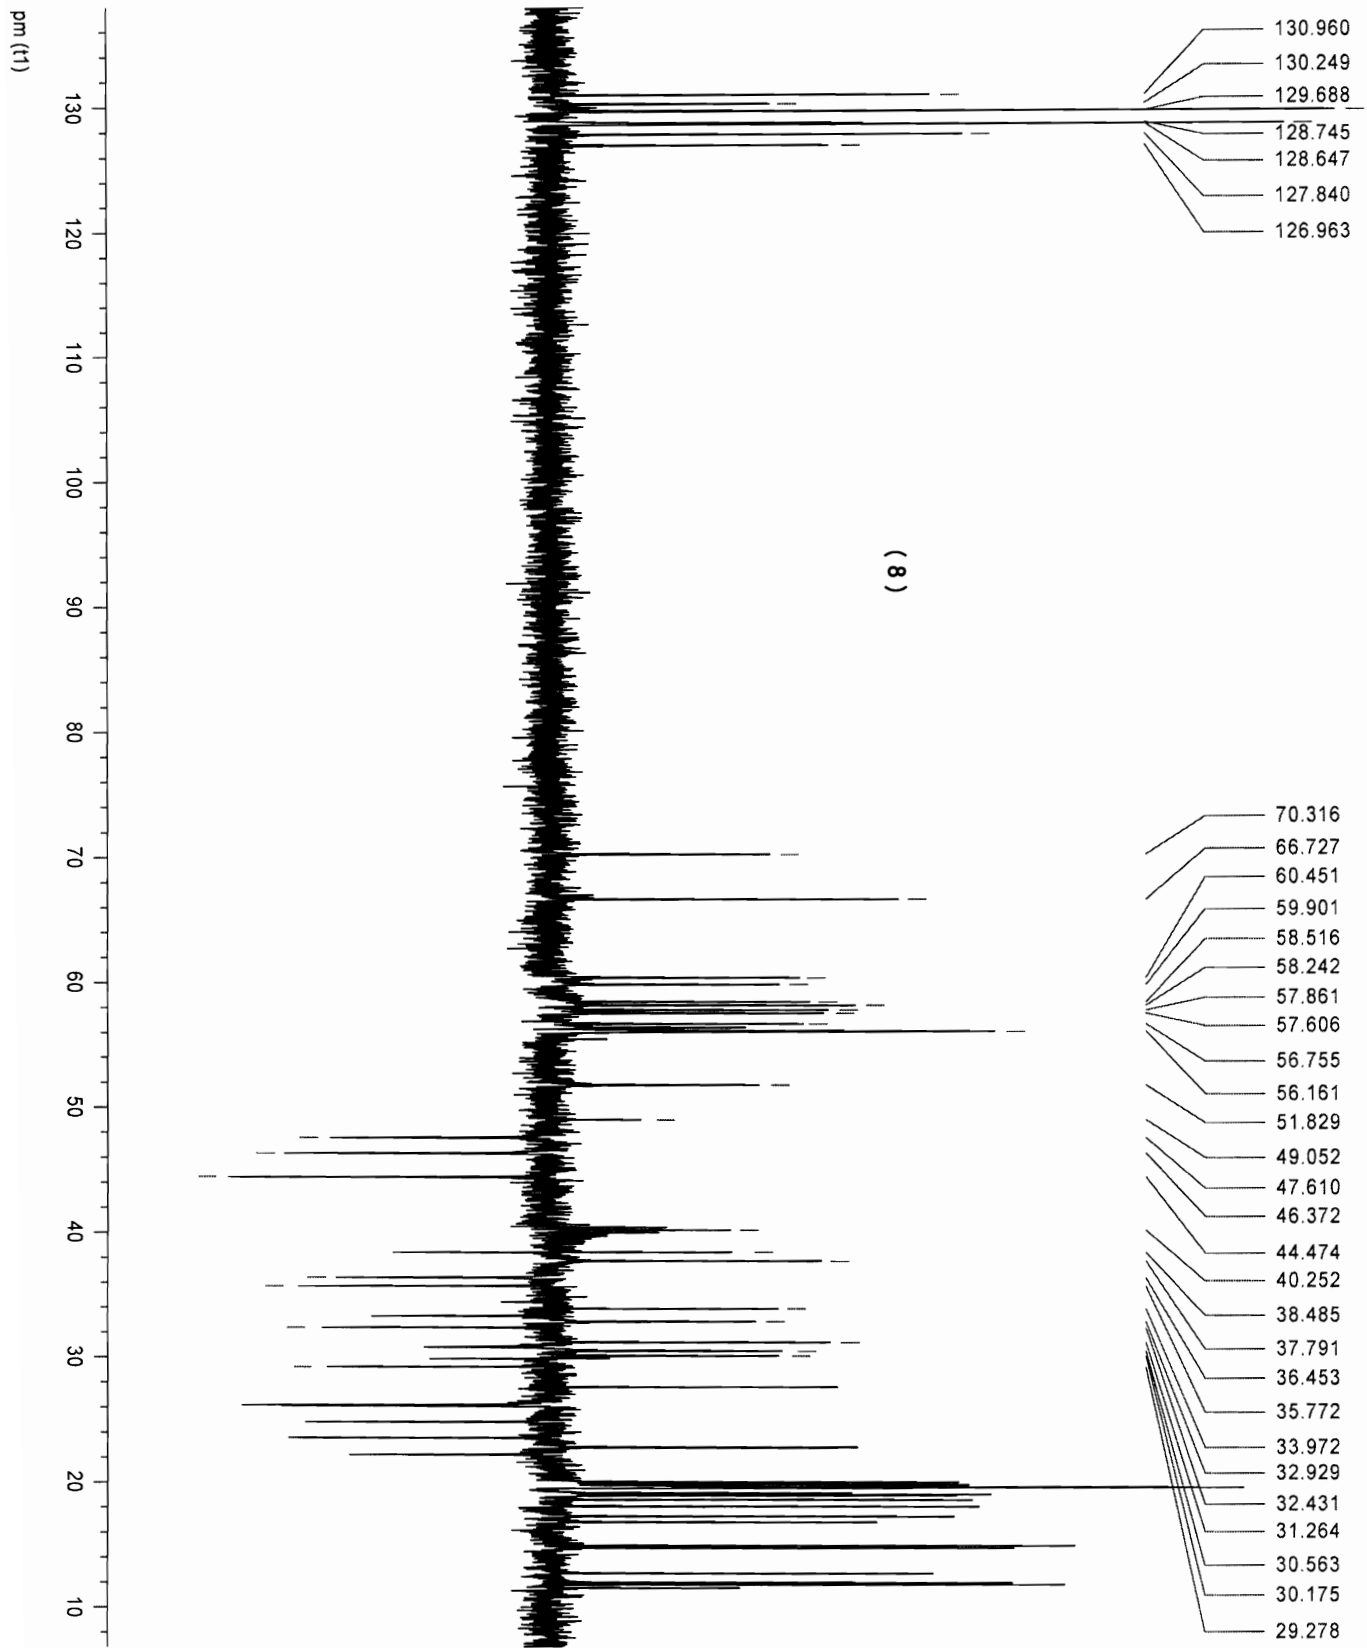



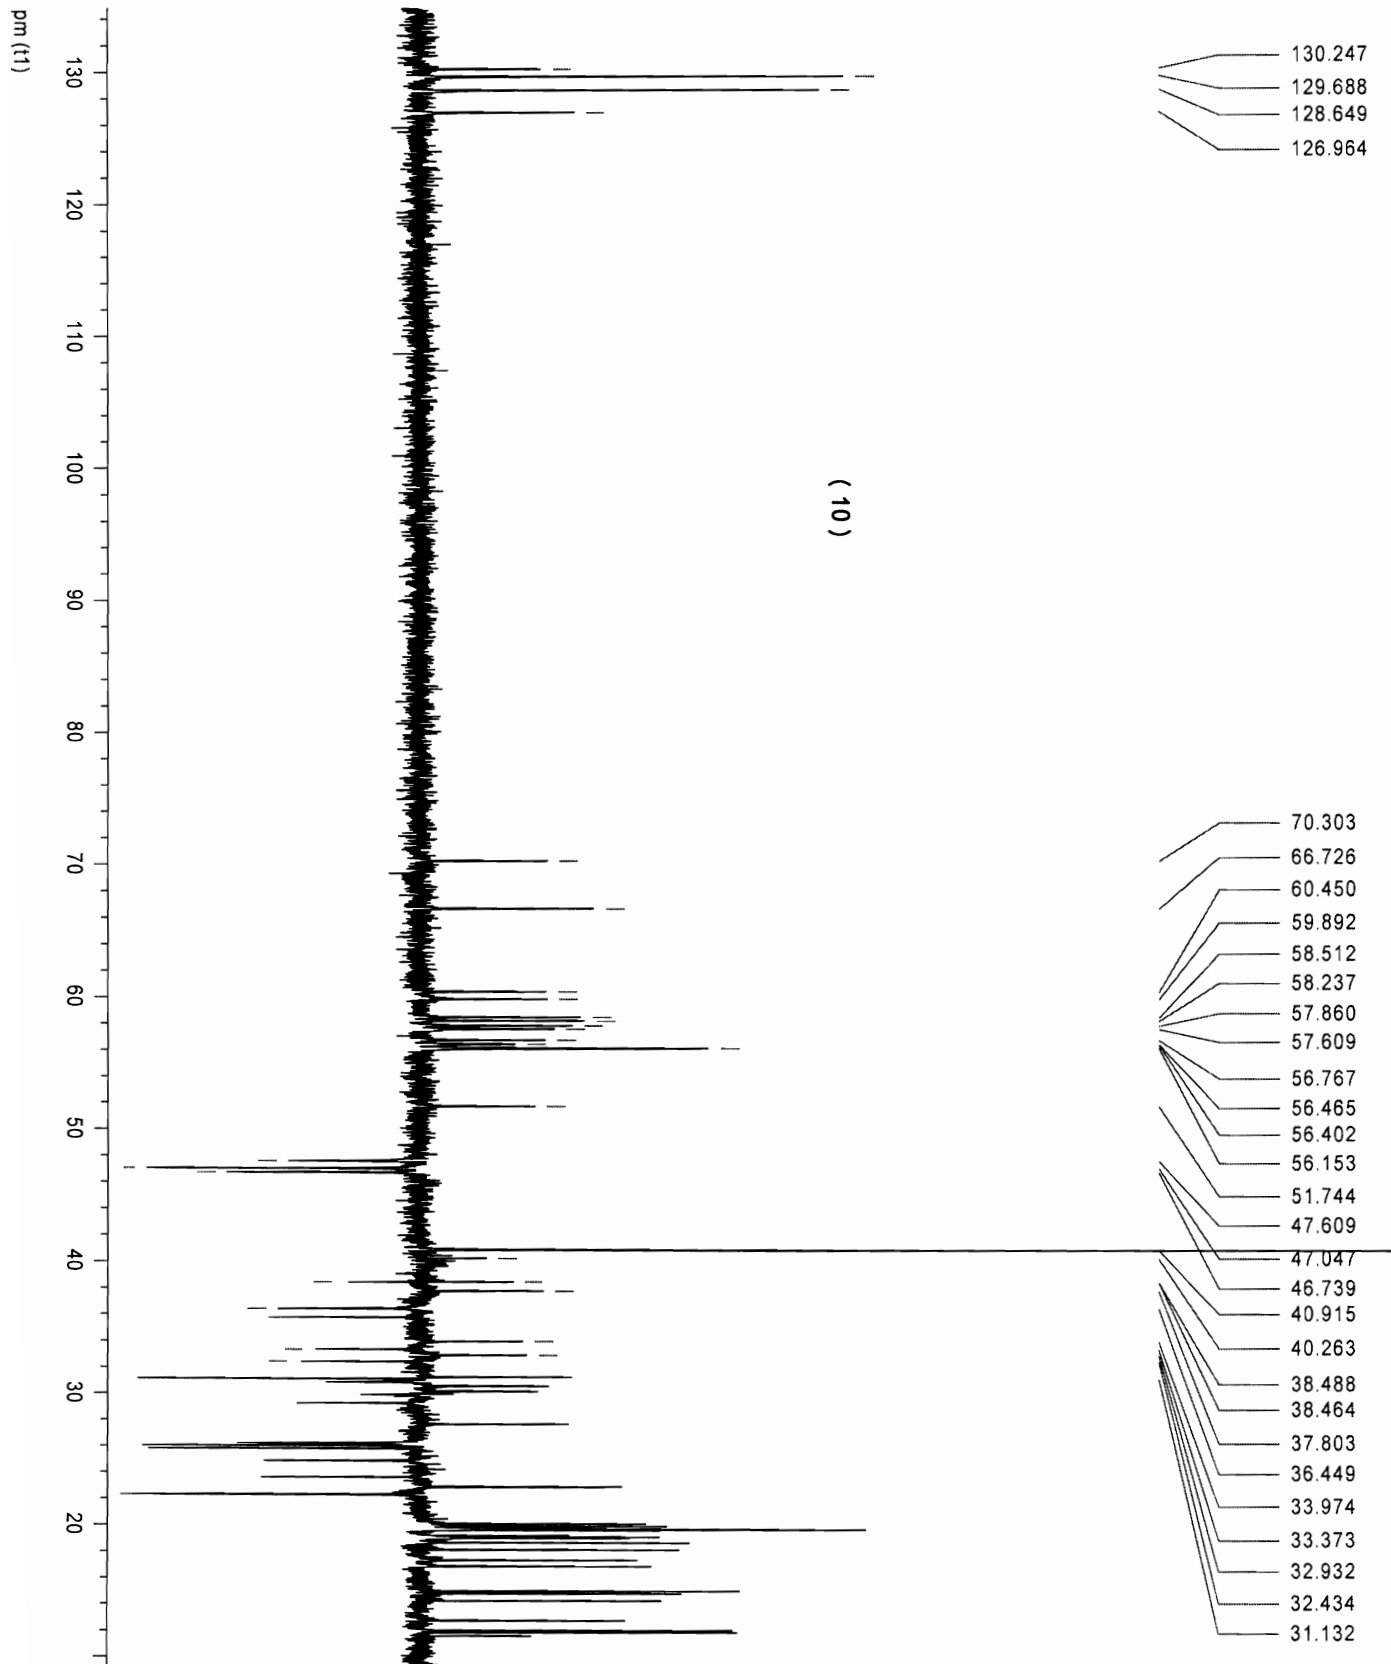





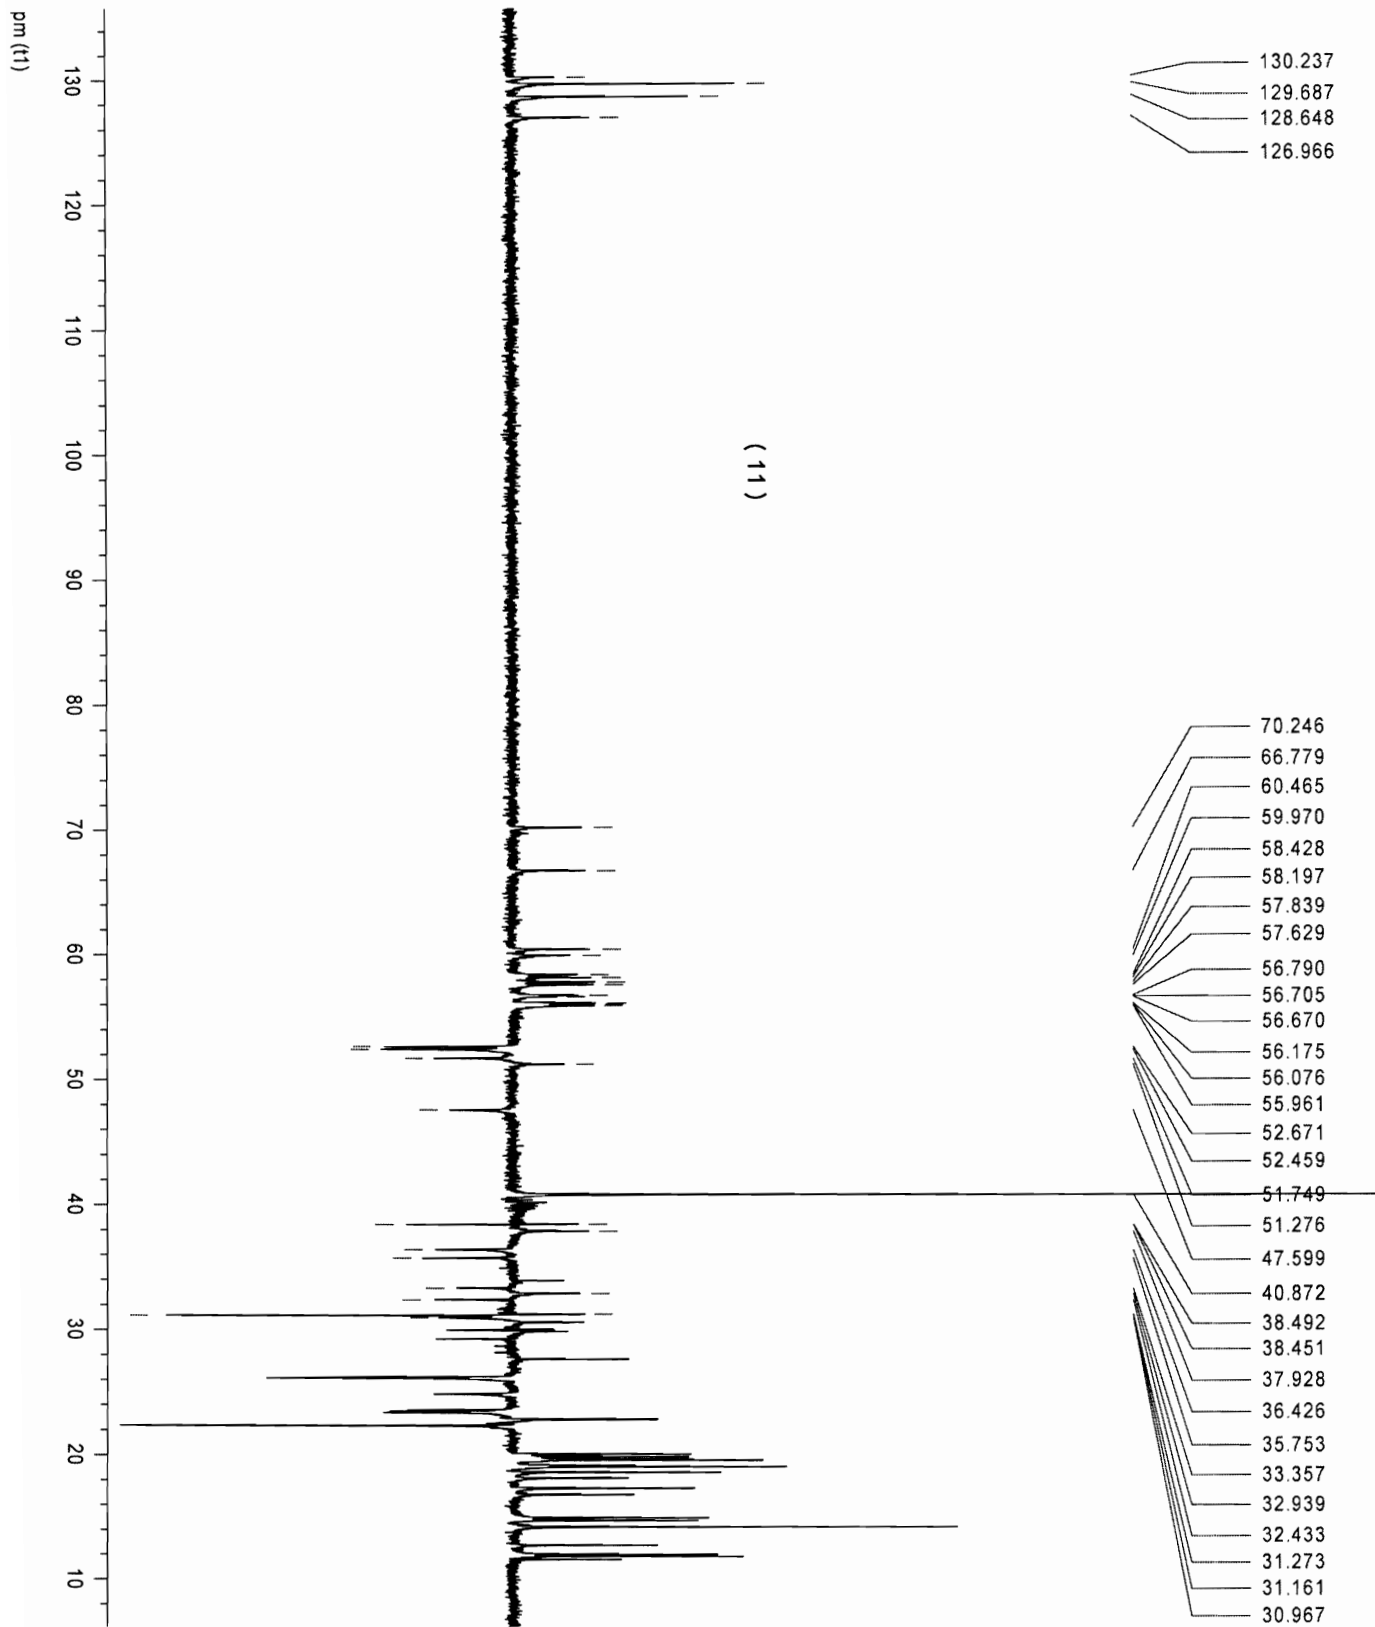

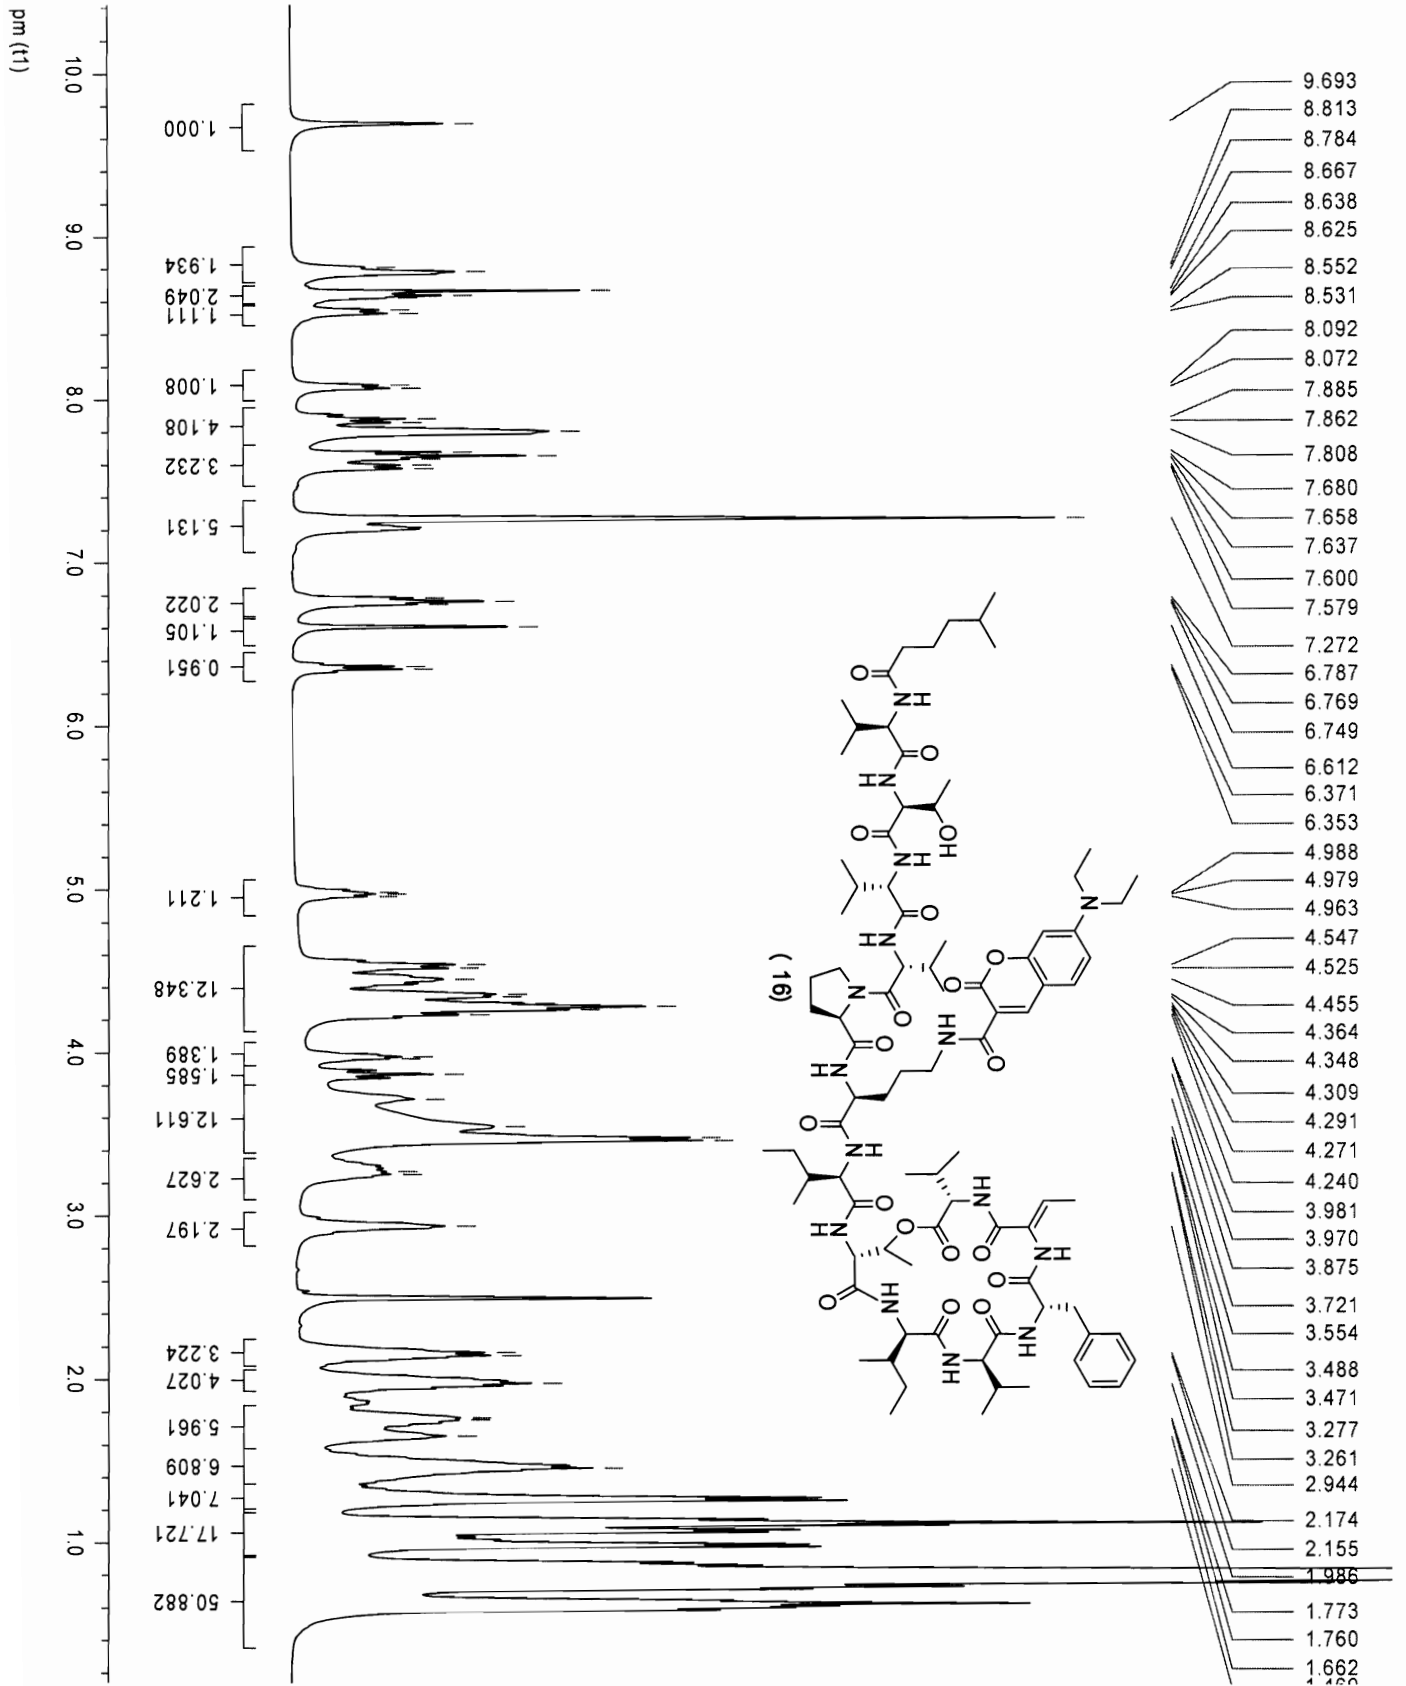

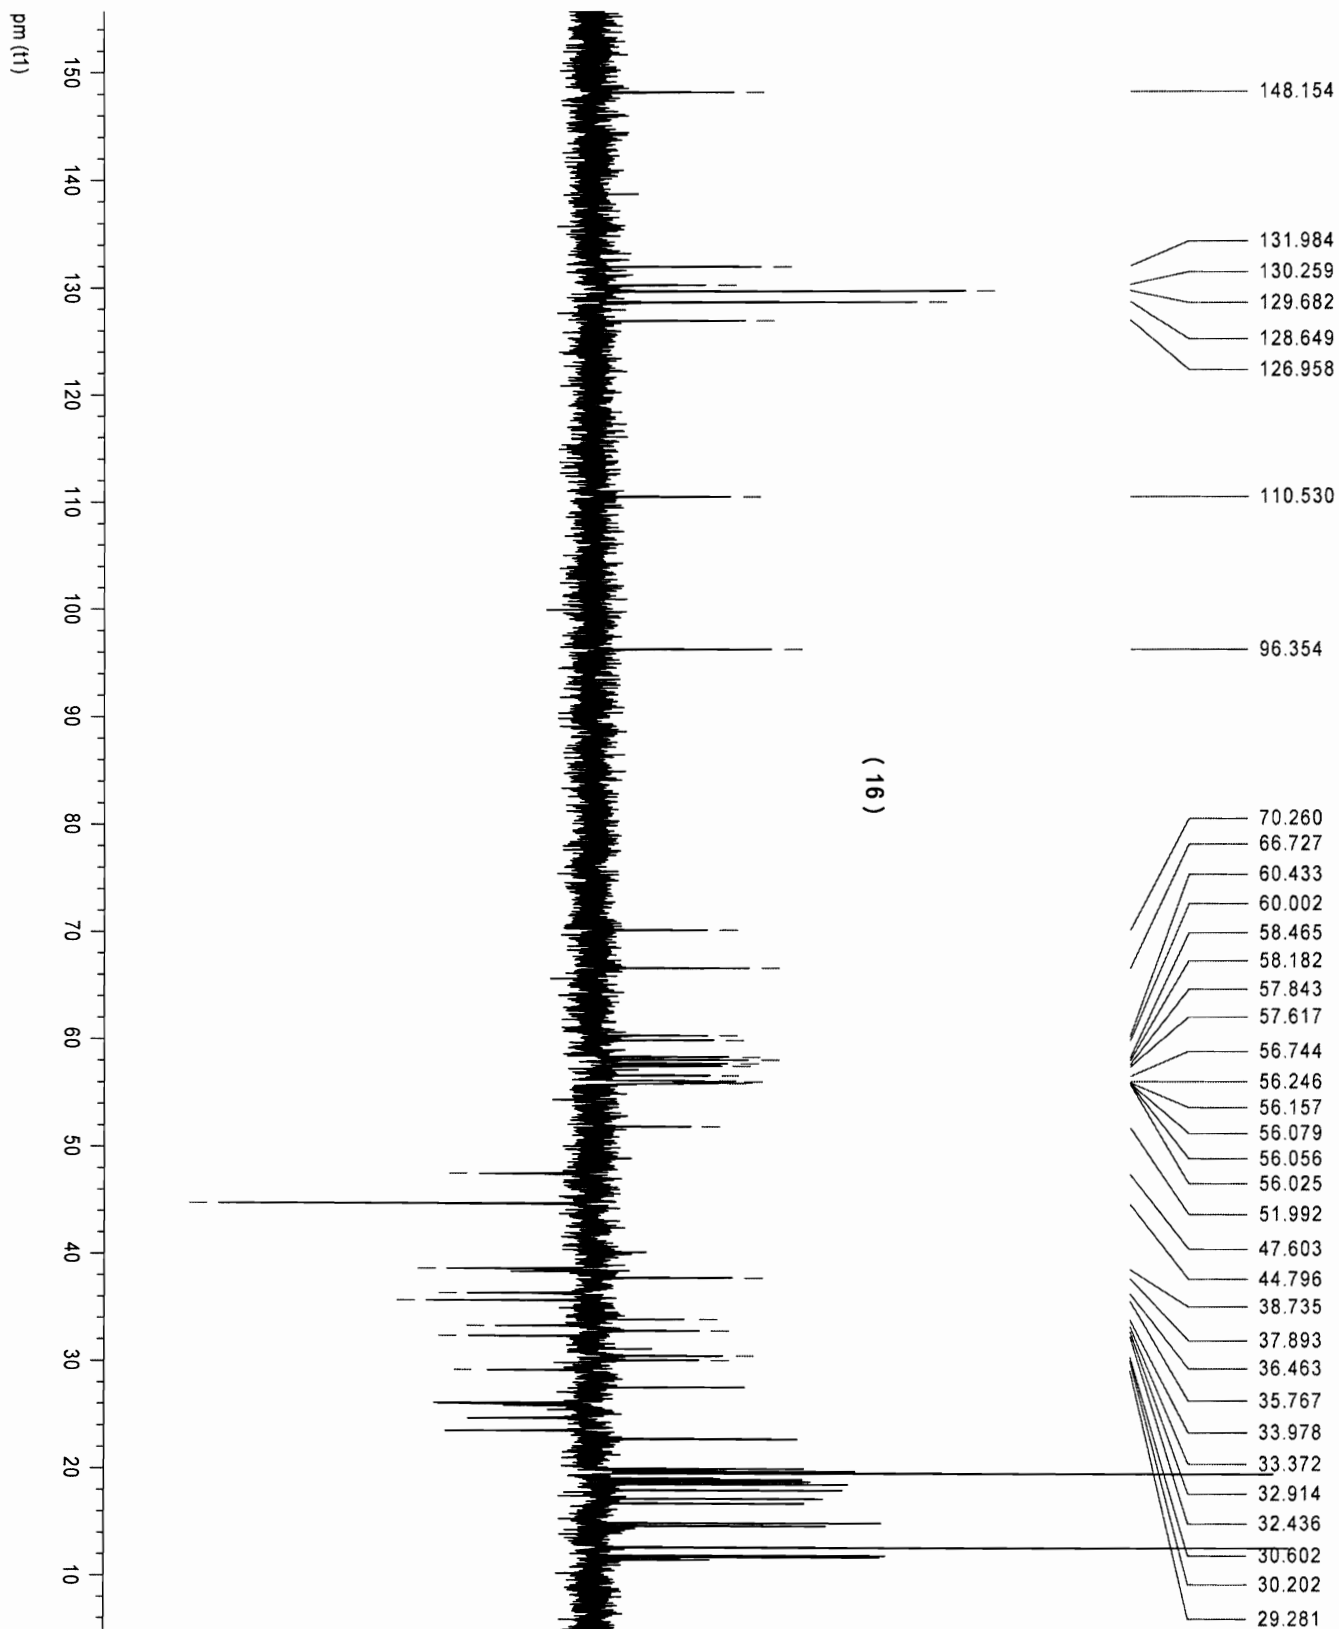

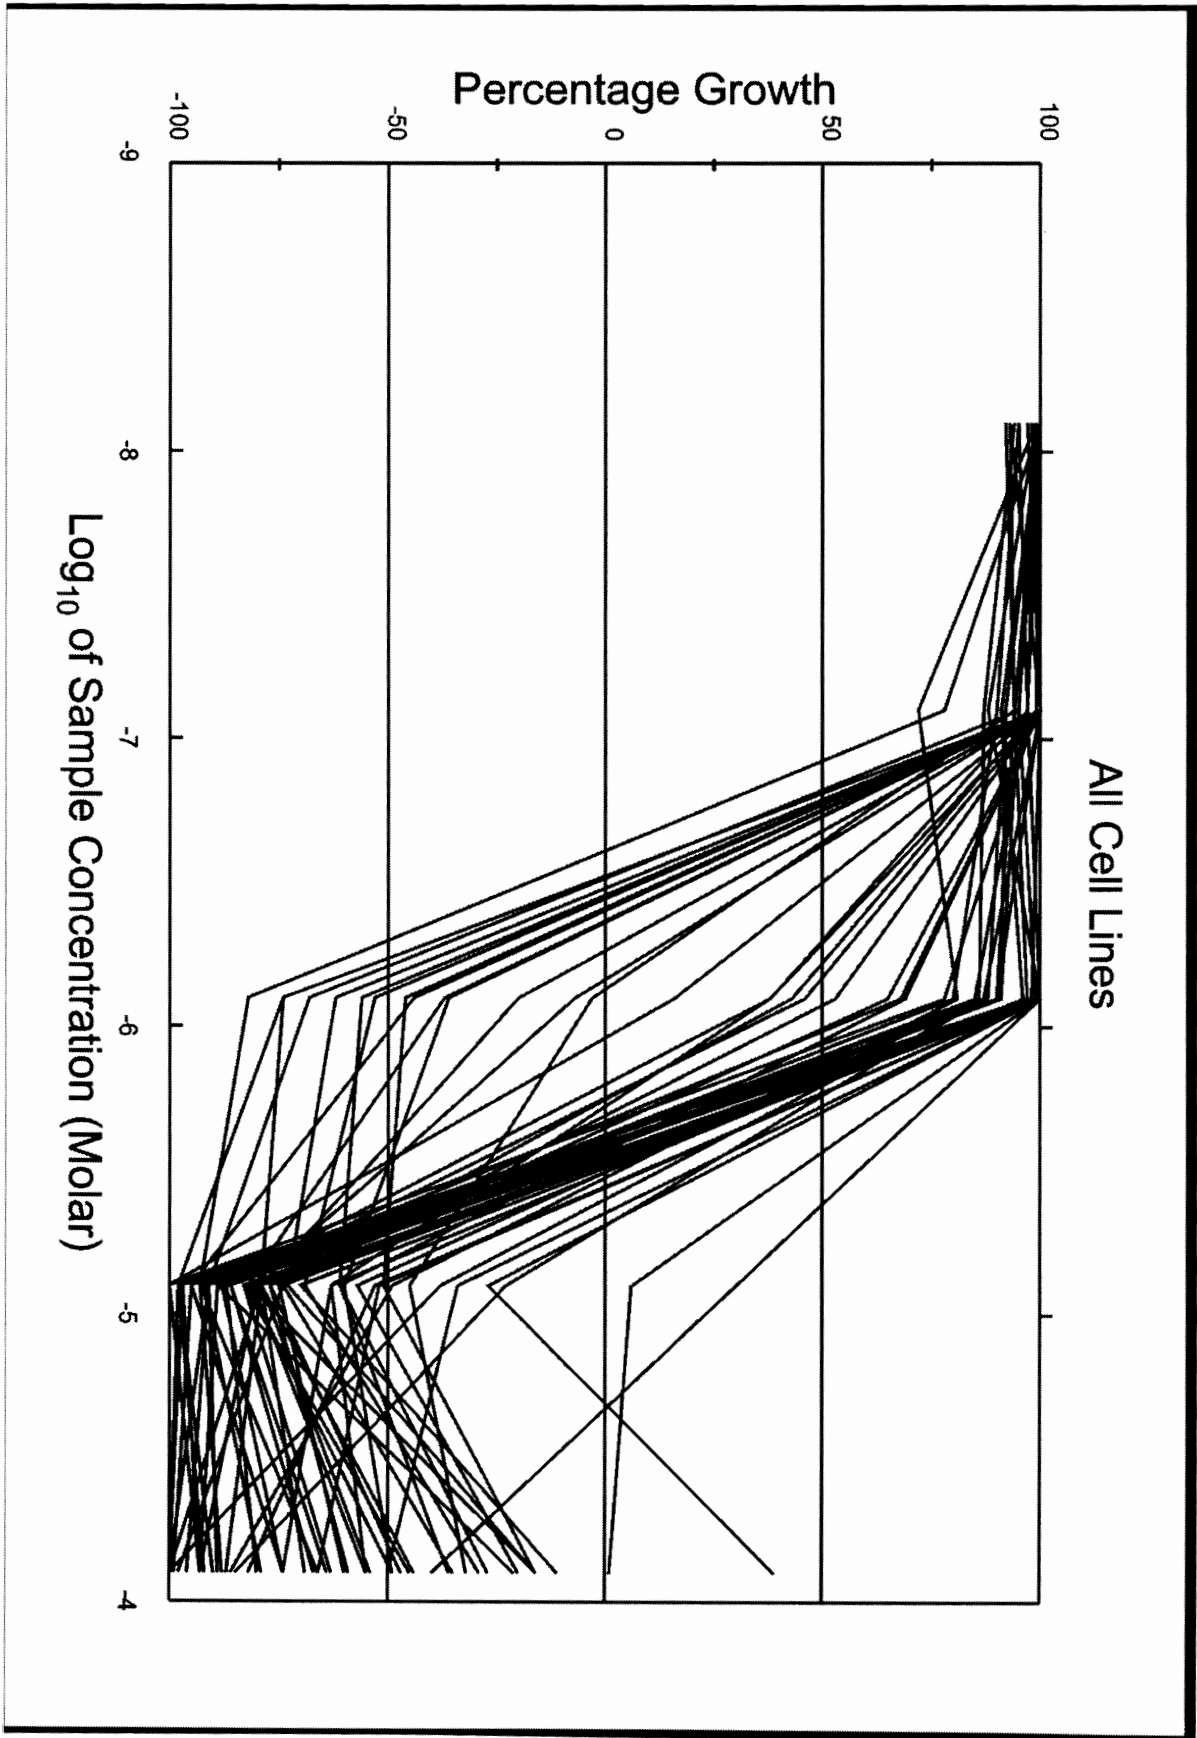

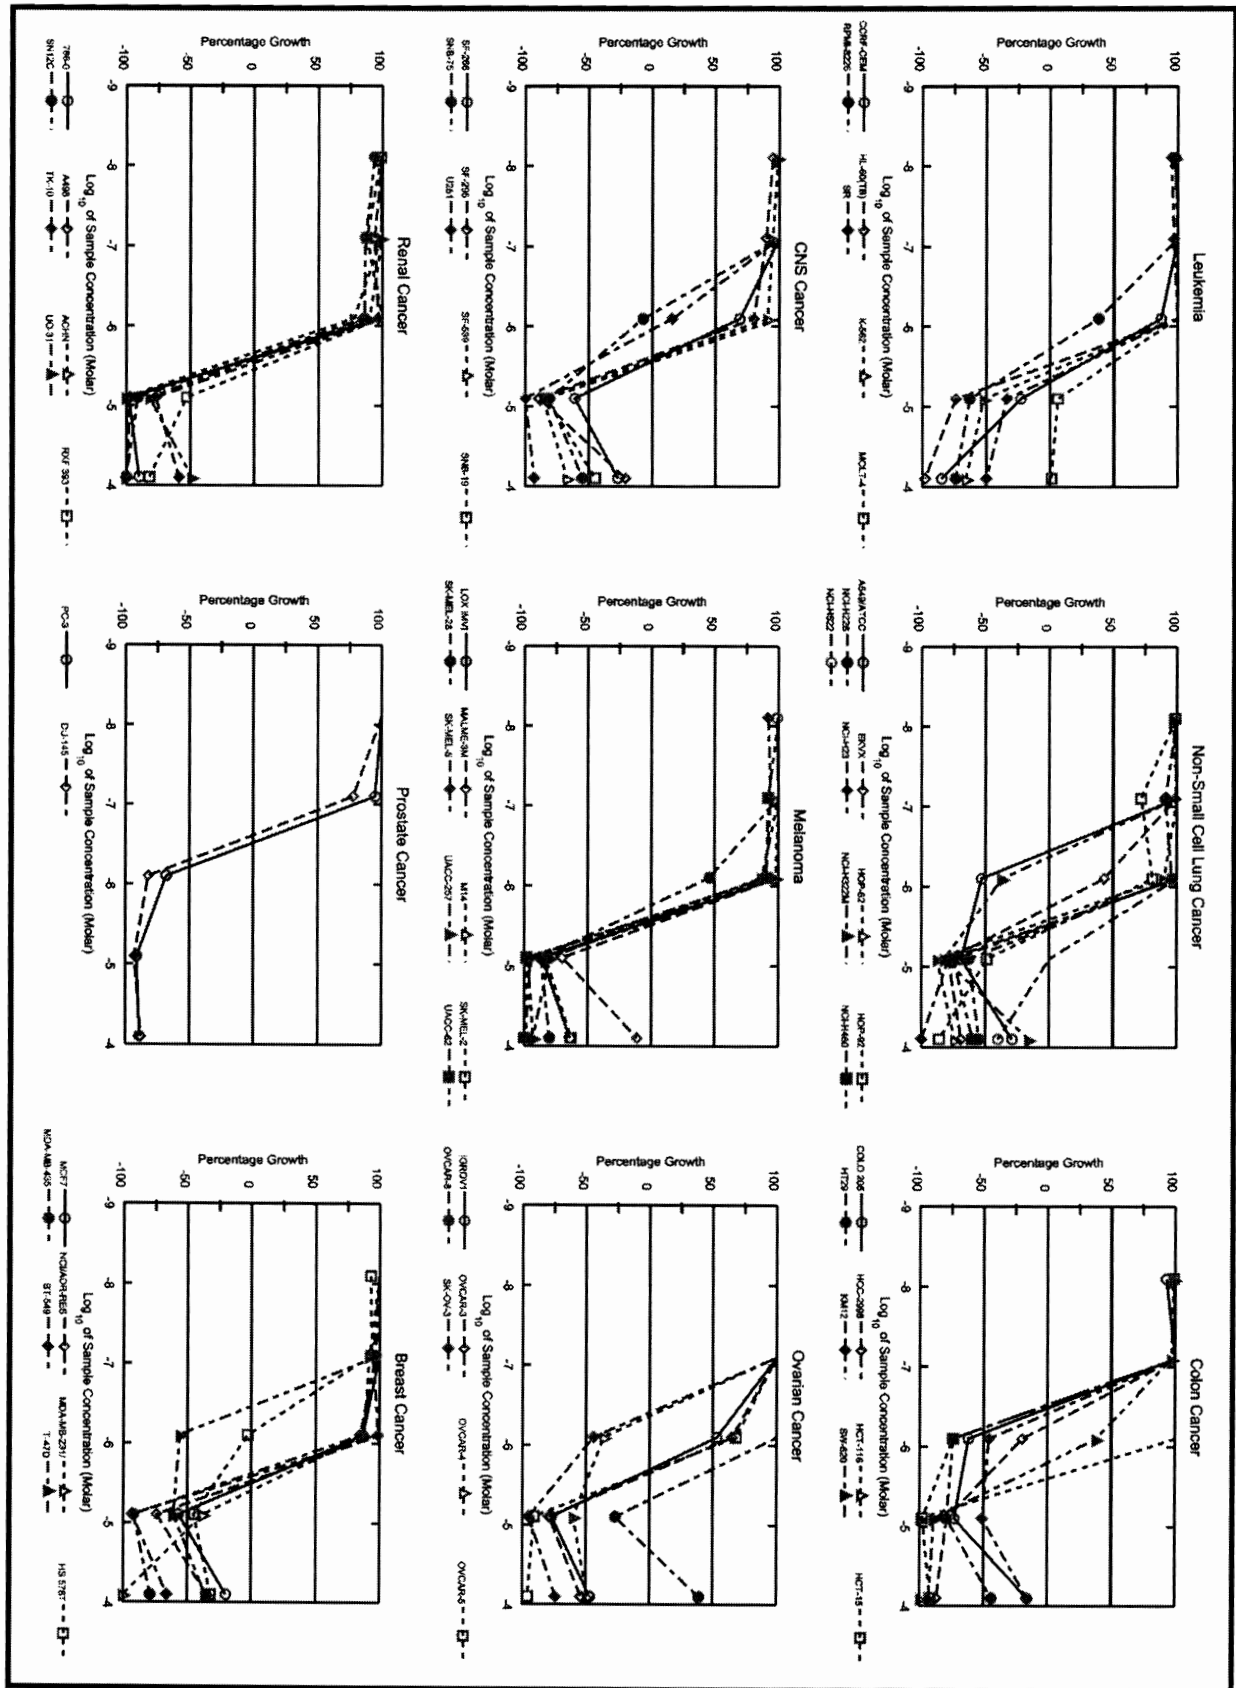

| Panel/Cell Line            | Time            | Log10 Concentration |       |       |       |       |        |        |        |        |     | G50 | TGI  | LG50 |         |           |           |         |
|----------------------------|-----------------|---------------------|-------|-------|-------|-------|--------|--------|--------|--------|-----|-----|------|------|---------|-----------|-----------|---------|
|                            |                 | CHI                 | -8.1  | -7.1  | -6.1  | -5.1  | -4.1   | -3.1   | -2.1   | -1.1   | 0.1 |     |      |      |         |           |           |         |
| Leukemia                   | Zero            |                     |       |       |       |       |        |        |        |        |     |     |      |      |         |           |           |         |
|                            | CCRF-CEM        | 0.872               | 2.997 | 3.290 | 3.242 | 2.729 | 0.688  | 0.008  | 0.131  | 114    | 112 | 87  | -23  | -85  | 1.63E-6 | 4.61E-6   | 2.03E-5   |         |
|                            | HL-60(TB)       | 0.485               | 1.178 | 1.248 | 1.341 | 1.323 | 0.128  | 0.008  | 0.008  | 110    | 124 | 121 | -74  | -98  | 1.74E-6 | 3.13E-6   | 5.64E-6   |         |
|                            | K-562           | 0.612               | 1.981 | 1.966 | 2.183 | 2.228 | 0.296  | 0.206  | 0.206  | 98     | 115 | 118 | -52  | -86  | 1.89E-6 | 3.72E-6   | 7.32E-6   |         |
|                            | NLO1-4          | 0.355               | 1.292 | 1.332 | 1.432 | 1.430 | 0.412  | 0.369  | 0.369  | 104    | 115 | 115 | 6    | 1    | 2.89E-6 | > 7.50E-6 | > 7.50E-6 |         |
| Non-Small Cell Lung Cancer | PMH-8226        | 0.889               | 3.044 | 3.005 | 3.064 | 1.700 | 0.330  | 0.291  | 0.291  | 98     | 101 | 38  | -63  | -74  | 4.78E-7 | 1.78E-6   | 5.38E-6   |         |
|                            | SR              | 0.315               | 1.385 | 1.317 | 1.333 | 1.422 | 0.209  | 0.150  | 0.150  | 89     | 97  | 105 | -34  | -50  | 1.88E-6 | 4.30E-6   | 7.03E-6   |         |
| Colon Cancer               | AS49ATC         | 0.311               | 1.434 | 1.512 | 1.444 | 0.147 | 0.096  | 0.222  | 0.222  | 107    | 101 | -53 | -69  | -29  | 1.61E-7 | 3.40E-7   | 4.94E-6   |         |
|                            | EXVX            | 0.489               | 1.287 | 1.324 | 1.257 | 0.814 | 0.006  | 0.146  | 0.146  | 107    | 89  | 43  | -79  | -89  | 5.69E-7 | 1.69E-6   | 4.34E-6   |         |
|                            | HOP-62          | 0.185               | 0.587 | 0.547 | 0.598 | 0.519 | 0.023  | 0.033  | 0.033  | 97     | 103 | 80  | -88  | -74  | 1.28E-6 | 2.40E-6   | 4.59E-6   |         |
|                            | HOP-62          | 0.918               | 1.462 | 1.468 | 1.309 | 1.357 | 0.143  | 0.143  | 0.143  | 99     | 72  | 81  | -49  | -86  | 1.30E-6 | 1.30E-6   | 8.18E-6   |         |
|                            | NCH4226         | 0.473               | 1.054 | 1.112 | 1.010 | 1.040 | 0.176  | 0.213  | 0.213  | 108    | 96  | 96  | -63  | -55  | 1.48E-6 | 3.02E-6   | 8.22E-6   |         |
|                            | NCH423          | 0.481               | 1.306 | 1.382 | 1.408 | 1.328 | 0.105  | 0.002  | 0.002  | 108    | 113 | 103 | -79  | -100 | 1.48E-6 | 2.78E-6   | 5.21E-6   |         |
|                            | NCH432M         | 0.554               | 1.249 | 1.279 | 1.385 | 0.347 | 0.089  | 0.085  | 0.085  | 104    | 117 | 37  | -82  | -18  | 2.03E-7 | 1.48E-6   | 1.48E-6   |         |
|                            | NCH4460         | 0.238               | 1.591 | 2.101 | 2.053 | 2.017 | 0.089  | 0.085  | 0.085  | 108    | 104 | 101 | -75  | -40  | 1.47E-6 | 2.82E-6   | 5.43E-6   |         |
|                            | NCH4522         | 0.854               | 2.079 | 2.112 | 2.253 | 2.208 | 0.353  | 0.316  | 0.316  | 103    | 114 | 111 | .    | 40   | 2.65E-6 | 7.34E-6   | > 7.50E-6 |         |
|                            | CNS Cancer      | COLO-205            | 0.211 | 0.953 | 0.988 | 0.989 | 0.081  | 0.057  | 0.177  | 0.177  | 93  | 102 | -82  | -73  | -16     | 1.89E-7   | 3.15E-7   | 3.67E-6 |
|                            |                 | HCC-2998            | 0.549 | 1.588 | 1.887 | 1.610 | 0.441  | 0.115  | 0.074  | 0.074  | 110 | 102 | -20  | -79  | -87     | 2.01E-7   | 6.17E-7   | 2.43E-6 |
|                            |                 | HCC-116             | 0.124 | 1.053 | 1.075 | 1.091 | 1.085  | -0.006 | -0.026 | -0.026 | 102 | 104 | 103  | -100 | -100    | 1.37E-6   | 2.42E-6   | 4.28E-6 |
| HCC-116                    |                 | 0.223               | 1.236 | 1.252 | 1.339 | 0.059 | 0.006  | 0.018  | 0.018  | 104    | 104 | -74 | -98  | -92  | 1.51E-7 | 2.89E-7   | 5.52E-7   |         |
| HT29                       |                 | 0.188               | 1.129 | 1.153 | 1.188 | 0.044 | 0.038  | 0.094  | 0.094  | 103    | 104 | -74 | -79  | -44  | 1.51E-7 | 2.88E-7   | 4.28E-6   |         |
| KM12                       |                 | 0.388               | 1.483 | 1.492 | 1.575 | 0.211 | 0.192  | 0.325  | 0.325  | 101    | 108 | -46 | -51  | -16  | 1.79E-7 | 3.79E-7   | 4.96E-6   |         |
| SW-620                     |                 | 0.094               | 0.688 | 0.661 | 0.653 | 0.310 | 0.010  | 0.007  | 0.007  | 99     | 97  | 38  | -89  | -93  | 4.65E-7 | 1.48E-6   | 3.67E-6   |         |
| Ovarian Cancer             |                 | IGROV1              | 0.818 | 1.930 | 1.980 | 2.033 | 1.404  | 0.188  | 0.435  | 0.435  | 105 | 109 | 53   | -77  | -47     | 7.87E-7   | 1.91E-6   | 4.75E-6 |
|                            |                 | DVCAH-3             | 0.406 | 0.741 | 0.801 | 0.799 | 0.626  | 0.087  | 0.165  | 0.165  | 118 | 117 | 65   | -79  | -54     | 9.60E-7   | 2.14E-6   | 4.75E-6 |
|                            |                 | DVCAH-4             | 0.443 | 1.019 | 1.057 | 1.076 | 0.284  | 0.177  | 0.227  | 0.227  | 107 | 110 | -36  | -60  | -49     | 1.93E-7   | 4.25E-7   | 4.16E-6 |
|                            | DVCAH-5         | 0.366               | 0.800 | 0.832 | 0.845 | 0.662 | 0.034  | 0.014  | 0.014  | 107    | 110 | 68  | -91  | -86  | 9.78E-7 | 2.01E-6   | 4.16E-6   |         |
|                            | DVCAH-8         | 0.099               | 0.439 | 0.480 | 0.447 | 0.449 | 0.072  | 0.233  | 0.233  | 106    | 102 | 103 | -27  | 39   | 1.91E-6 | 1.91E-6   | > 7.50E-6 |         |
|                            | SK-OV-3         | 0.651               | 1.447 | 1.595 | 1.525 | 0.363 | 0.030  | 0.170  | 0.170  | 117    | 110 | -44 | -95  | -74  | 1.83E-7 | 3.87E-7   | 9.72E-7   |         |
|                            | Renal Cancer    | 786-0               | 0.322 | 1.311 | 1.301 | 1.346 | 1.324  | 0.005  | 0.031  | 0.031  | 99  | 104 | 101  | -98  | -90     | 1.39E-6   | 2.41E-6   | 4.29E-6 |
| A488                       |                 | 1.109               | 1.739 | 1.746 | 1.701 | 1.723 | 0.039  | -0.027 | -0.027 | 101    | 94  | 97  | -97  | -100 | 1.32E-6 | 2.38E-6   | 4.32E-6   |         |
| ACHN                       |                 | 0.204               | 0.793 | 0.801 | 0.790 | 0.654 | -0.004 | 0.001  | 0.001  | 101    | 89  | 78  | -100 | -100 | 1.08E-6 | 2.06E-6   | 3.83E-6   |         |
| RFX-383                    |                 | 0.788               | 1.197 | 1.192 | 1.145 | 1.189 | 0.358  | 0.141  | 0.141  | 99     | 88  | 100 | -53  | -82  | 1.59E-6 | 3.37E-6   | 7.12E-6   |         |
| SN12C                      |                 | 0.613               | 2.358 | 2.251 | 2.128 | 2.114 | 0.054  | -0.022 | -0.022 | 94     | 87  | 86  | -91  | -100 | 1.20E-6 | 2.29E-6   | 4.39E-6   |         |
| TK-10                      |                 | 0.658               | 1.300 | 1.304 | 1.304 | 1.311 | 0.154  | 0.271  | 0.271  | 106    | 101 | 102 | -77  | -59  | 1.48E-6 | 2.79E-6   | 5.32E-6   |         |
| UC-31                      |                 | 0.525               | 1.402 | 1.472 | 1.473 | 1.316 | 0.094  | 0.288  | 0.288  | 108    | 108 | 90  | -82  | -49  | 1.28E-6 | 2.50E-6   | 5.32E-6   |         |
| Prostate Cancer            |                 | PC-3                | 0.356 | 1.134 | 1.139 | 1.099 | 0.114  | 0.032  | 0.040  | 0.040  | 101 | 95  | -88  | -91  | -89     | 1.42E-7   | 2.87E-7   | 5.81E-7 |
|                            |                 | DU-145              | 0.220 | 0.917 | 0.920 | 0.764 | 0.039  | 0.015  | 0.026  | 0.026  | 100 | 78  | -82  | -93  | -88     | 1.12E-7   | 2.30E-7   | 4.72E-7 |
| Breast Cancer              |                 | MCF7                | 0.287 | 1.754 | 1.777 | 1.890 | 1.589  | 0.123  | 0.231  | 0.231  | 102 | 107 | 87   | -57  | -20     | 1.39E-6   | 3.02E-6   | 3.78E-6 |
|                            | NCI/ADR-RES     | 0.406               | 1.311 | 1.356 | 1.328 | 1.328 | 0.106  | 0.263  | 0.263  | 105    | 110 | 102 | -74  | -35  | 1.49E-6 | 3.85E-6   | 1.18E-5   |         |
|                            | MDA-MB-231A/TCC | 0.377               | 1.002 | 1.005 | 0.983 | 0.928 | 0.235  | -0.020 | -0.020 | 100    | 92  | 88  | -36  | -100 | 1.80E-6 | 3.76E-6   | 7.32E-6   |         |
|                            | HS 578T         | 0.426               | 0.895 | 0.863 | 0.865 | 0.413 | 0.238  | 0.288  | 0.288  | 93     | 94  | -3  | -45  | -32  | 2.12E-7 | 6.95E-7   | 6.95E-7   |         |
|                            | MDA-MB-435      | 0.475               | 1.555 | 1.578 | 1.528 | 1.389 | 0.088  | 0.088  | 0.088  | 102    | 97  | 85  | -42  | -79  | 1.18E-6 | 2.25E-6   | 4.32E-6   |         |
|                            | BT-549          | 0.377               | 0.755 | 0.771 | 0.738 | 0.750 | 0.028  | 0.130  | 0.130  | 104    | 95  | 99  | -80  | -68  | 1.35E-6 | 2.48E-6   | 4.48E-6   |         |
|                            | T-47D           | 0.627               | 1.274 | 1.352 | 1.290 | 0.278 | 0.246  | 0.403  | 0.403  | 112    | 102 | -56 | -61  | -38  | 1.81E-7 | 3.35E-7   | 4.48E-6   |         |

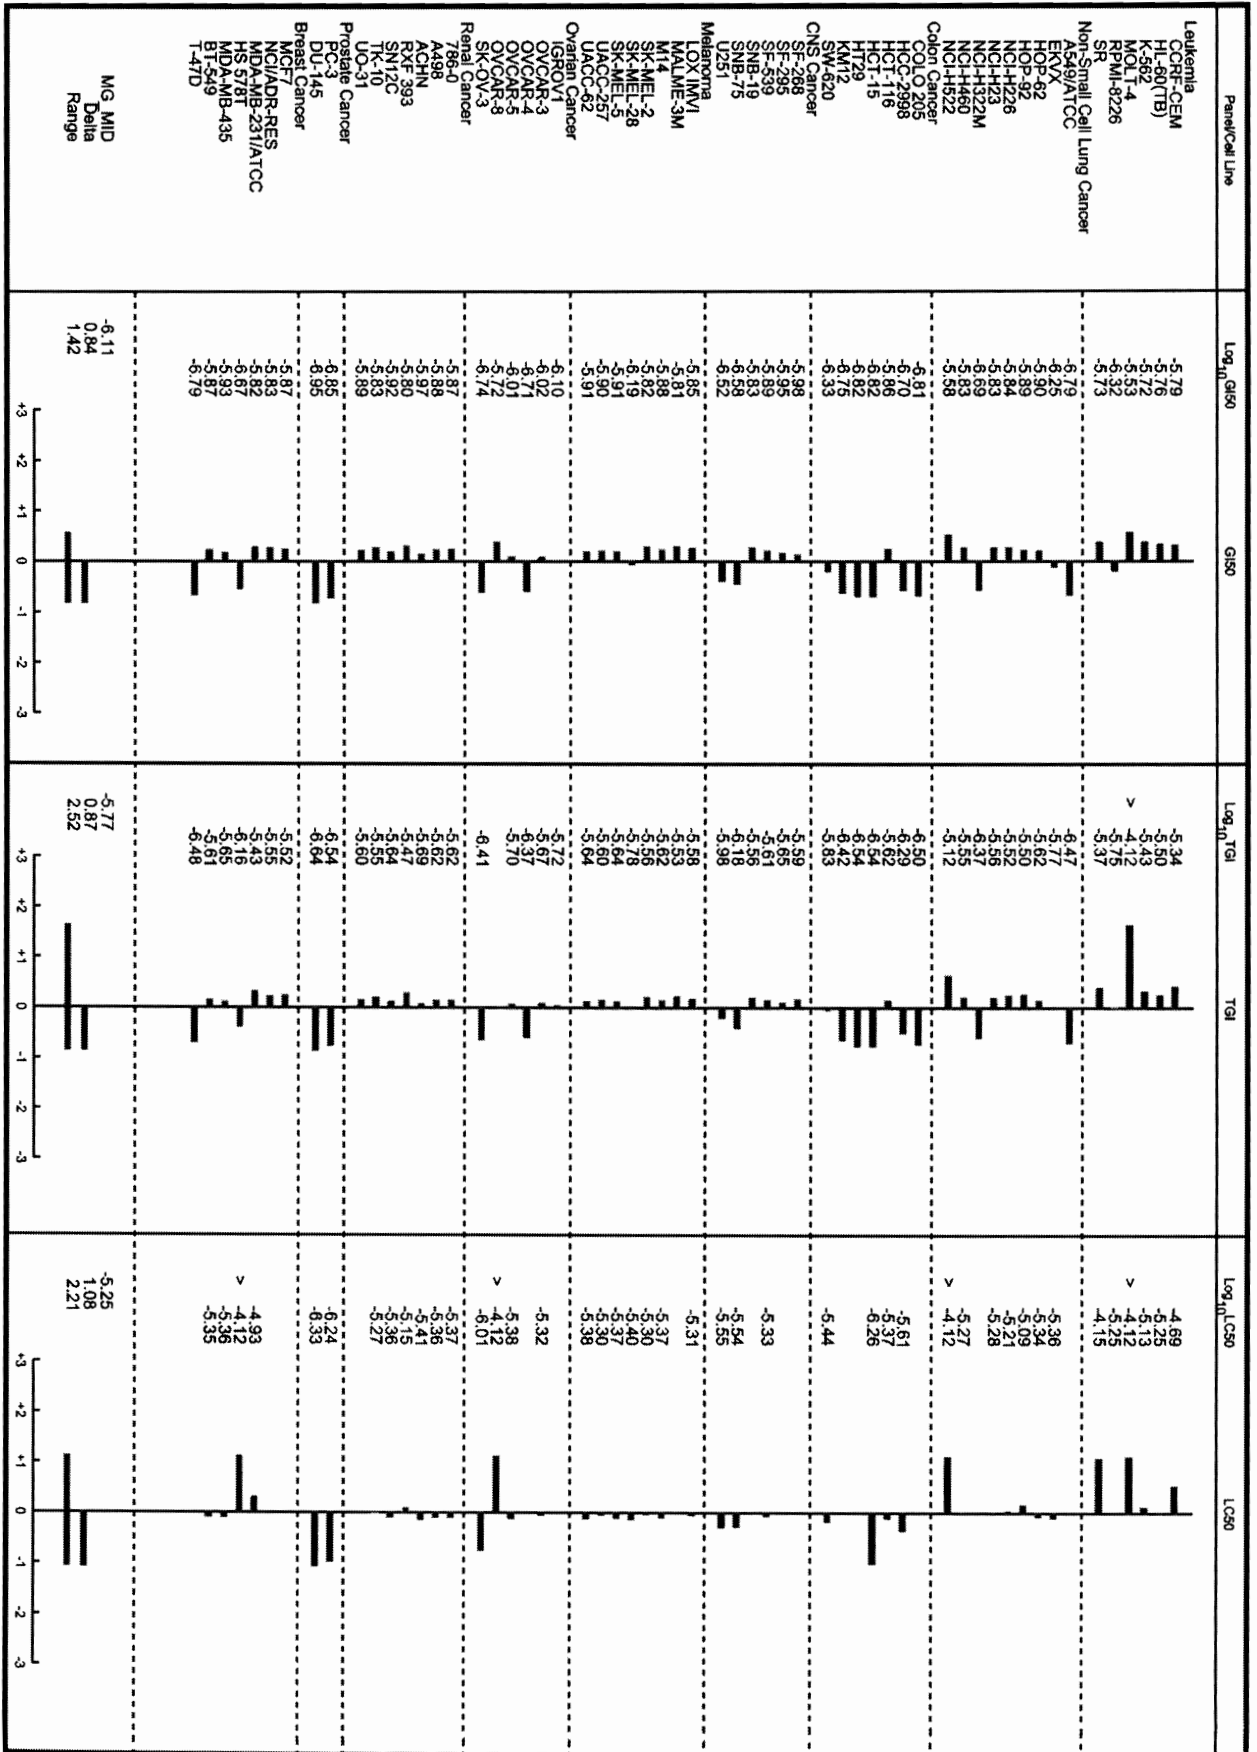



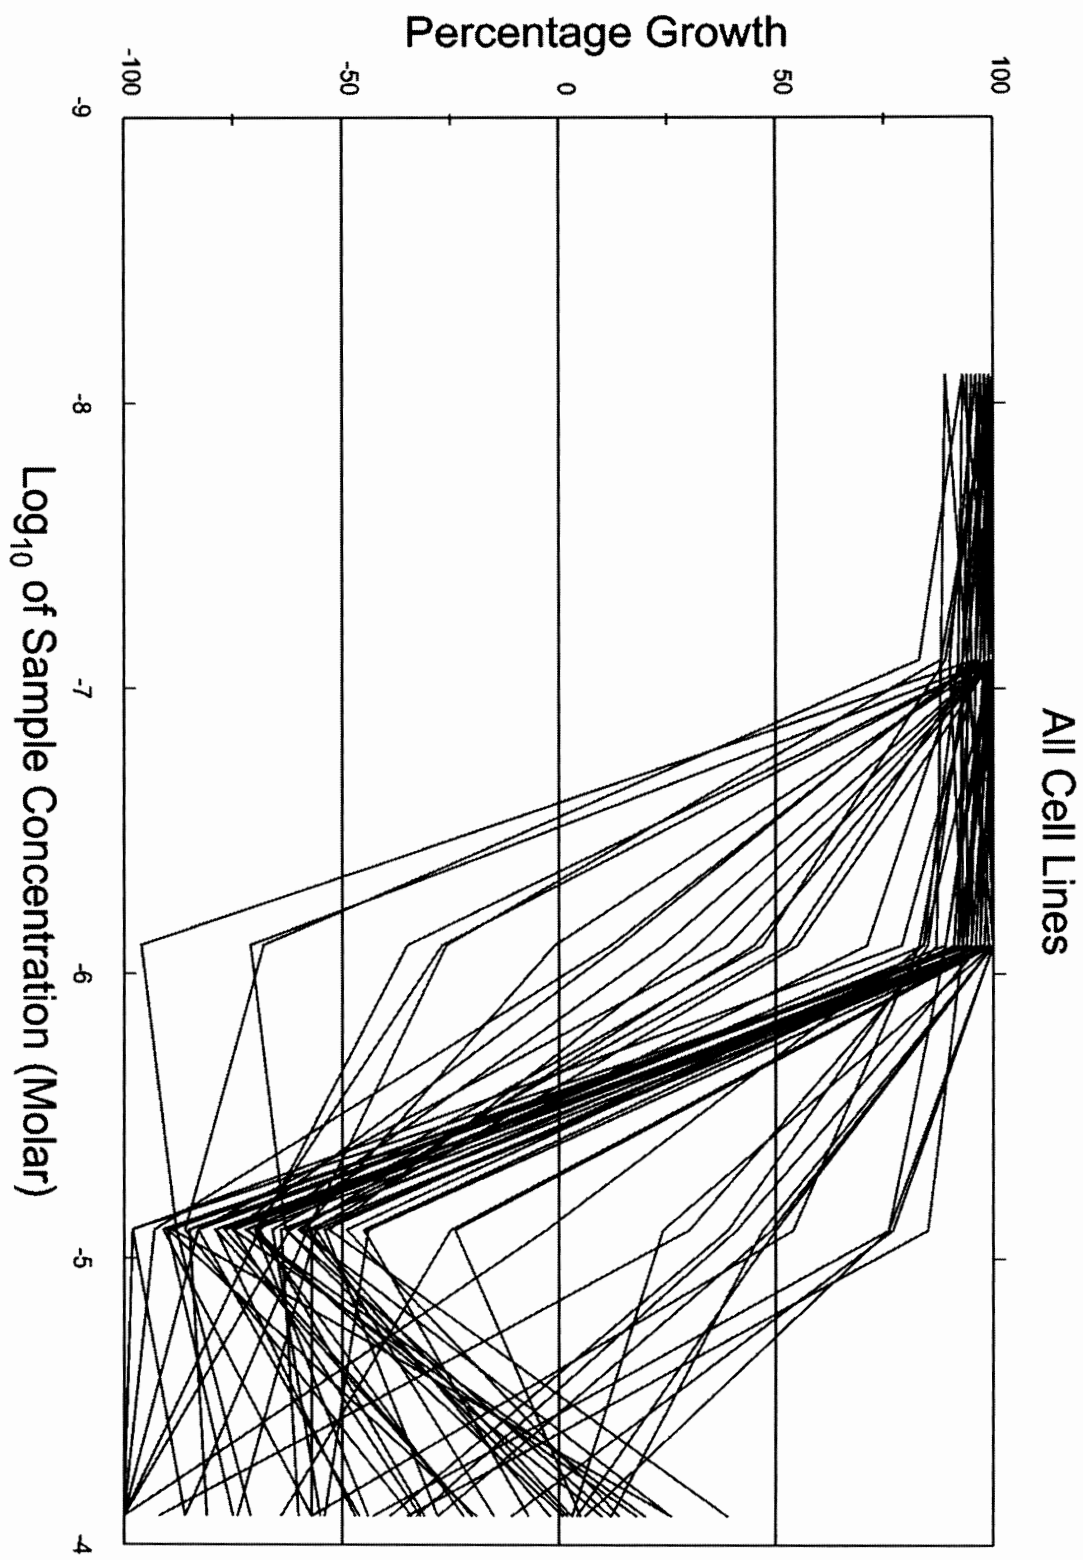

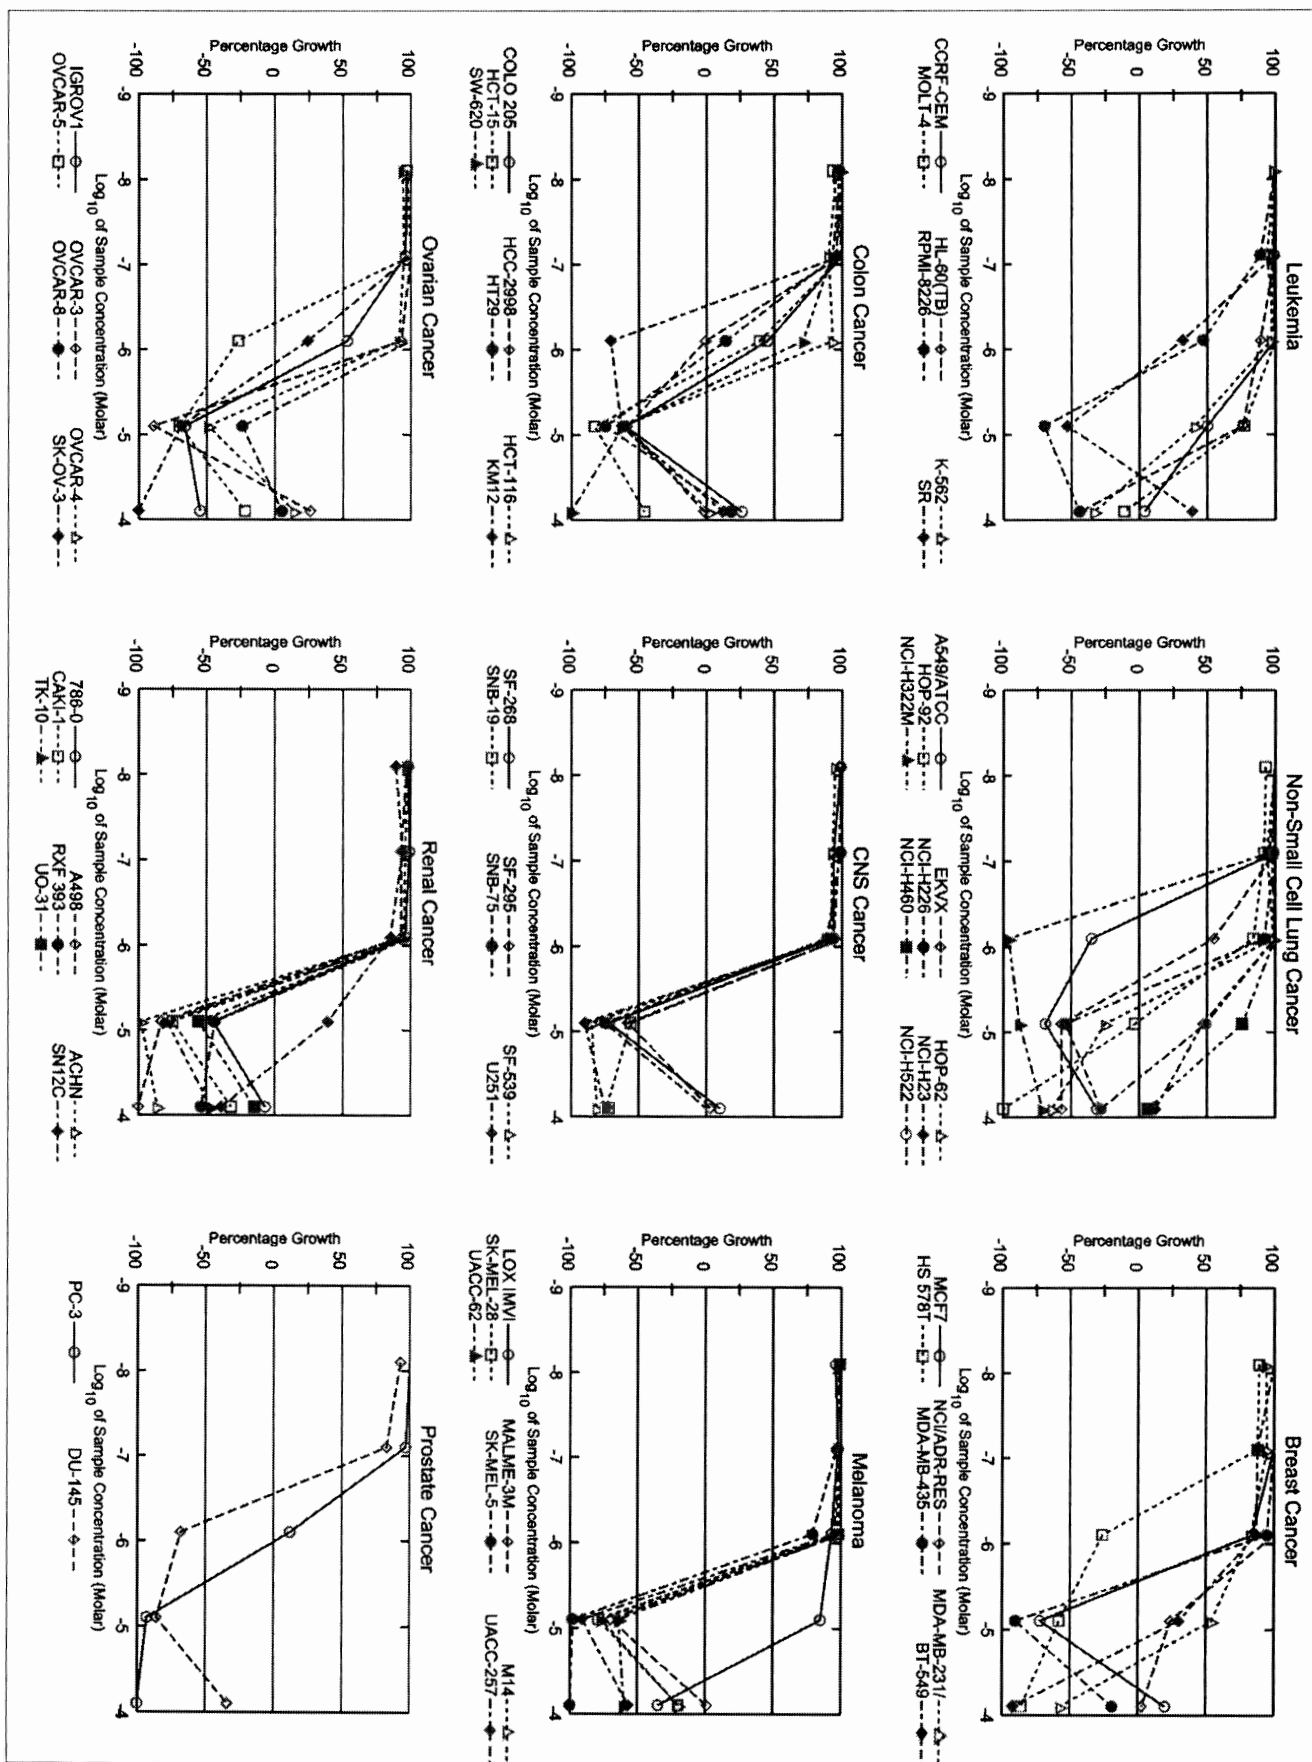

| Panel/Cell Line            | Time  | Ctrl  | Mean Optical Densities |       |       |       |        |      |      |      |      |      | GI50    | TGI       | LC50      |  |  |
|----------------------------|-------|-------|------------------------|-------|-------|-------|--------|------|------|------|------|------|---------|-----------|-----------|--|--|
|                            |       |       | -8.1                   | -7.1  | -6.1  | -5.1  | -4.1   | -8.1 | -7.1 | -6.1 | -5.1 | -4.1 |         |           |           |  |  |
| Leukemia                   |       |       |                        |       |       |       |        |      |      |      |      |      |         |           |           |  |  |
| CCRF-CEM                   | 0.299 | 1.415 | 1.498                  | 1.405 | 1.439 | 0.859 | 0.348  | 107  | 99   | 102  | 50   | 4    | 7.56E-6 | > 7.50E-5 | > 7.50E-5 |  |  |
| HL-60(TB)                  | 0.414 | 2.157 | 2.309                  | 2.162 | 1.966 | 1.744 | 0.238  | 100  | 100  | 89   | 76   | -43  | 3.29E-5 | > 7.50E-5 | > 7.50E-5 |  |  |
| K-562                      | 0.163 | 1.646 | 1.628                  | 1.617 | 1.600 | 0.772 | 0.109  | 99   | 98   | 102  | 41   | -33  | 5.19E-5 | > 7.50E-5 | > 7.50E-5 |  |  |
| MOLT-4                     | 0.488 | 2.077 | 2.157                  | 1.986 | 2.108 | 1.707 | 0.436  | 105  | 94   | 102  | 77   | -11  | 1.51E-5 | > 7.50E-5 | > 7.50E-5 |  |  |
| RPML1-8226                 | 0.713 | 2.224 | 2.333                  | 2.051 | 1.425 | 0.213 | 0.398  | 107  | 89   | 102  | 47   | -44  | 6.38E-7 | 1.89E-6   | .         |  |  |
| SR                         | 0.248 | 0.822 | 0.819                  | 0.837 | 0.430 | 0.117 | 0.472  | 100  | 103  | 32   | -53  | 39   | 4.13E-7 | .         | .         |  |  |
| Non-Small Cell Lung Cancer |       |       |                        |       |       |       |        |      |      |      |      |      |         |           |           |  |  |
| A549/ATCC                  | 0.449 | 1.557 | 1.620                  | 1.638 | 0.292 | 0.139 | 0.310  | 106  | 107  | -35  | -69  | -31  | 1.89E-7 | 4.29E-7   | 6.51E-6   |  |  |
| HKVX                       | 0.403 | 1.148 | 1.259                  | 1.199 | 0.811 | 0.174 | 0.175  | 115  | 107  | 55   | -57  | -57  | 8.26E-7 | 2.32E-6   | 3.29E-5   |  |  |
| EOP-62                     | 0.372 | 1.287 | 1.299                  | 1.231 | 1.274 | 0.278 | 0.135  | 101  | 94   | 99   | -25  | -64  | 1.85E-6 | 6.86E-6   | 2.28E-5   |  |  |
| HOP-92                     | 1.035 | 1.464 | 1.433                  | 1.459 | 1.394 | 1.000 | -0.005 | 93   | 92   | 84   | -3   | -100 | 1.82E-6 | 6.96E-6   | 2.28E-5   |  |  |
| NCI-H226                   | 0.816 | 1.760 | 1.860                  | 1.856 | 1.688 | 0.375 | 0.591  | 111  | 110  | 102  | -54  | -28  | 3.21E-6 | 3.21E-6   | 2.28E-5   |  |  |
| NCI-H223                   | 0.360 | 1.006 | 1.006                  | 1.036 | 1.031 | 0.018 | 0.664  | 105  | 104  | 102  | 47   | 12   | 1.48E-6 | > 7.50E-5 | > 7.50E-5 |  |  |
| NCI-H322M                  | 0.701 | 1.799 | 1.759                  | 1.761 | 0.029 | 0.086 | 0.207  | 105  | 106  | -86  | -98  | -71  | 1.31E-7 | 2.38E-7   | 4.33E-7   |  |  |
| NCI-H460                   | 0.241 | 1.845 | 1.903                  | 1.808 | 1.838 | 1.480 | 0.332  | 104  | 98   | 100  | 78   | 6    | 1.78E-5 | > 7.50E-5 | > 7.50E-5 |  |  |
| NCI-H522                   | 0.437 | 0.952 | 0.962                  | 0.948 | 1.014 | 0.891 | 0.316  | 102  | 99   | 112  | 49   | -28  | 7.32E-6 | 3.27E-5   | > 7.50E-5 |  |  |
| Colon Cancer               |       |       |                        |       |       |       |        |      |      |      |      |      |         |           |           |  |  |
| COLO 205                   | 0.202 | 0.821 | 0.885                  | 0.860 | 0.480 | 0.081 | 0.365  | 110  | 106  | 45   | -60  | 26   | 6.18E-7 | 7.32E-7   | .         |  |  |
| HCC-2998                   | 0.417 | 1.348 | 1.401                  | 1.354 | 0.413 | 0.173 | 0.410  | 106  | 101  | -1   | -59  | -2   | 2.36E-7 | 7.32E-7   | .         |  |  |
| HCT-116                    | 0.185 | 1.682 | 1.624                  | 1.536 | 1.580 | 0.069 | 0.222  | 96   | 90   | 93   | -63  | -2   | 1.42E-6 | 1.59E-6   | .         |  |  |
| HCT-15                     | 0.223 | 1.282 | 1.208                  | 1.293 | 0.632 | 0.038 | 0.120  | 93   | 101  | 39   | -83  | -46  | 4.92E-7 | 1.59E-6   | .         |  |  |
| HT29                       | 0.210 | 1.530 | 1.497                  | 1.481 | 0.390 | 0.053 | 0.450  | 98   | 98   | 14   | -75  | 18   | 2.72E-7 | .         | .         |  |  |
| KM12                       | 0.458 | 2.087 | 2.053                  | 2.146 | 0.135 | 0.171 | 0.657  | 98   | 104  | -71  | -63  | 12   | 1.52E-7 | .         | .         |  |  |
| SW-620                     | 0.157 | 1.036 | 1.033                  | 0.980 | 0.783 | 0.060 | -0.077 | 99   | 93   | 71   | -82  | -100 | 1.08E-6 | 2.56E-6   | 6.08E-6   |  |  |
| CNS Cancer                 |       |       |                        |       |       |       |        |      |      |      |      |      |         |           |           |  |  |
| SF-268                     | 0.502 | 1.748 | 1.738                  | 1.677 | 1.670 | 0.139 | 0.621  | 99   | 94   | 94   | -72  | 10   | 1.38E-6 | .         | .         |  |  |
| SF-295                     | 0.678 | 2.360 | 2.351                  | 2.363 | 2.370 | 0.283 | 0.732  | 99   | 100  | 101  | -58  | 3    | 1.56E-6 | 2.49E-6   | 4.76E-6   |  |  |
| SF-539                     | 0.738 | 1.858 | 1.807                  | 1.778 | 1.770 | 0.112 | 0.137  | 95   | 93   | 92   | -85  | -81  | 1.30E-6 | 3.33E-6   | 6.87E-6   |  |  |
| SNB-19                     | 0.421 | 1.384 | 1.439                  | 1.412 | 1.414 | 0.185 | 0.108  | 106  | 103  | 103  | -58  | -74  | 1.62E-6 | 2.61E-6   | .         |  |  |
| SNB-75                     | 0.590 | 1.139 | 1.168                  | 1.131 | 1.077 | 0.143 | 0.579  | 105  | 99   | 89   | -75  | .    | 1.29E-6 | 2.61E-6   | .         |  |  |
| U251                       | 0.228 | 1.172 | 1.180                  | 1.149 | 1.119 | 0.023 | 0.056  | 101  | 98   | 94   | -90  | -75  | 1.31E-6 | 2.44E-6   | 4.56E-6   |  |  |
| Melanoma                   |       |       |                        |       |       |       |        |      |      |      |      |      |         |           |           |  |  |
| LOX IMVI                   | 0.260 | 1.833 | 1.776                  | 1.799 | 1.718 | 1.598 | 0.170  | 96   | 98   | 93   | 85   | -35  | 1.47E-5 | 3.85E-5   | > 7.50E-5 |  |  |
| MALME-3M                   | 0.667 | 1.244 | 1.296                  | 1.351 | 1.374 | 0.202 | 0.675  | 102  | 118  | 122  | -70  | 1    | 1.39E-6 | 2.70E-6   | .         |  |  |
| M14                        | 0.360 | 1.188 | 1.206                  | 1.185 | 1.163 | 0.082 | 0.288  | 109  | 101  | 97   | -77  | -20  | 1.97E-6 | 2.70E-6   | .         |  |  |
| SK-MEL-28                  | 0.685 | 1.994 | 1.976                  | 2.011 | 1.969 | 0.142 | 0.546  | 99   | 101  | 98   | -79  | -20  | 1.40E-6 | 2.68E-6   | 4.02E-6   |  |  |
| SK-MEL-6                   | 0.336 | 1.150 | 1.144                  | 1.126 | 0.980 | 0.007 | 0.480  | 99   | 97   | 79   | -98  | -100 | 1.09E-6 | 2.10E-6   | 4.50E-6   |  |  |
| UACC-257                   | 0.618 | 1.315 | 1.345                  | 1.338 | 1.282 | 0.054 | 0.264  | 104  | 103  | 95   | -91  | -57  | 1.31E-6 | 2.43E-6   | 4.50E-6   |  |  |
| UACC-62                    | 0.435 | 1.899 | 1.705                  | 1.793 | 1.725 | 0.156 | 0.176  | 100  | 107  | 102  | -64  | -60  | 1.54E-6 | 3.08E-6   | 6.17E-6   |  |  |
| Ovarian Cancer             |       |       |                        |       |       |       |        |      |      |      |      |      |         |           |           |  |  |
| IGROV1                     | 0.241 | 0.738 | 0.724                  | 0.717 | 0.503 | 0.083 | 0.109  | 97   | 96   | 53   | -66  | -55  | 7.91E-7 | 2.09E-6   | 5.54E-6   |  |  |
| OVCAR-3                    | 0.487 | 1.266 | 1.399                  | 1.381 | 1.232 | 0.056 | 0.695  | 114  | 112  | 93   | -89  | 28   | 1.30E-6 | 2.09E-6   | .         |  |  |
| OVCAR-4                    | 0.382 | 1.098 | 1.057                  | 1.082 | 1.030 | 0.184 | 0.488  | 94   | 95   | 91   | -49  | 14   | 1.47E-6 | .         | .         |  |  |
| OVCAR-5                    | 0.583 | 1.863 | 1.826                  | 1.902 | 0.424 | 0.177 | 0.455  | 97   | 103  | -27  | -70  | -22  | 1.91E-7 | 4.63E-7   | > 7.50E-5 |  |  |
| OVCAR-8                    | 0.532 | 1.798 | 1.827                  | 1.865 | 1.894 | 0.422 | 0.617  | 102  | 108  | 108  | -24  | 3    | 2.06E-6 | 1.38E-6   | > 7.50E-5 |  |  |
| SK-OV-3                    | 0.573 | 1.046 | 1.101                  | 1.091 | 0.888 | 0.177 | -0.018 | 112  | 109  | 24   | -69  | -100 | 3.74E-7 | 1.38E-6   | 4.67E-6   |  |  |
| Renal Cancer               |       |       |                        |       |       |       |        |      |      |      |      |      |         |           |           |  |  |
| 786-O                      | 0.590 | 2.208 | 2.184                  | 2.186 | 2.147 | 0.319 | 0.539  | 98   | 99   | 96   | 45   | -7   | 1.59E-6 | 3.60E-6   | > 7.50E-5 |  |  |
| A498                       | 0.482 | 0.997 | 0.981                  | 0.958 | 0.960 | 0.077 | 0.001  | 97   | 93   | 93   | -83  | -100 | 1.31E-6 | 2.53E-6   | 4.85E-6   |  |  |
| ACHN                       | 0.367 | 1.326 | 1.286                  | 1.290 | 1.277 | 0.006 | 0.051  | 97   | 86   | 93   | -98  | -86  | 1.28E-6 | 2.53E-6   | 4.85E-6   |  |  |
| CAKI-1                     | 0.571 | 1.098 | 1.132                  | 1.137 | 1.138 | 0.144 | 0.484  | 106  | 107  | 108  | -75  | -32  | 1.58E-6 | 2.92E-6   | 4.21E-6   |  |  |
| RX-F 393                   | 0.508 | 0.751 | 0.747                  | 0.785 | 0.785 | 0.284 | 0.234  | 98   | 114  | 114  | -44  | -34  | 1.90E-6 | 3.94E-6   | 2.99E-5   |  |  |
| SN12C                      | 0.537 | 1.707 | 1.577                  | 1.638 | 1.532 | 0.997 | 0.336  | 89   | 94   | 85   | 39   | -39  | 4.37E-6 | 2.37E-5   | > 7.50E-5 |  |  |
| TK-10                      | 0.571 | 1.169 | 1.214                  | 1.221 | 1.224 | 0.119 | 0.305  | 107  | 109  | 109  | -79  | -47  | 1.54E-6 | 2.85E-6   | .         |  |  |
| UO-31                      | 0.302 | 1.003 | 1.046                  | 1.048 | 1.014 | 0.133 | 0.257  | 106  | 106  | 102  | -56  | -15  | 1.59E-6 | 3.30E-6   | .         |  |  |
| Prostate Cancer            |       |       |                        |       |       |       |        |      |      |      |      |      |         |           |           |  |  |
| PC-3                       | 0.622 | 1.982 | 2.034                  | 1.939 | 0.783 | 0.045 | -0.078 | 104  | 97   | 12   | -93  | -100 | 2.67E-7 | 9.73E-7   | 2.93E-6   |  |  |
| DU-146                     | 0.170 | 0.686 | 0.651                  | 0.598 | 0.055 | 0.025 | 0.513  | 93   | 83   | -68  | -86  | -34  | 1.24E-7 | 2.66E-7   | .         |  |  |
| Breast Cancer              |       |       |                        |       |       |       |        |      |      |      |      |      |         |           |           |  |  |
| MCF7                       | 0.226 | 0.993 | 1.080                  | 1.036 | 0.871 | 0.063 | 0.377  | 111  | 108  | 94   | -72  | 20   | 1.24E-6 | > 7.50E-5 | > 7.50E-5 |  |  |
| NCI/ADR-RES                | 0.510 | 1.563 | 1.645                  | 1.646 | 1.674 | 0.782 | 0.538  | 108  | 106  | 111  | 24   | 2    | 3.75E-6 | > 7.50E-5 | > 7.50E-5 |  |  |
| MDA-MB-231/ATCC            | 0.315 | 1.190 | 1.149                  | 1.165 | 1.078 | 0.881 | 0.224  | 94   | 95   | 83   | 54   | -57  | 8.19E-6 | 2.32E-5   | 6.93E-5   |  |  |
| HS 578T                    | 0.432 | 0.776 | 0.737                  | 0.736 | 0.320 | 0.180 | 0.360  | 103  | 88   | -26  | -58  | -86  | 1.82E-6 | 4.44E-6   | 4.14E-6   |  |  |
| MDA-MB-435                 | 0.435 | 1.594 | 1.623                  | 1.637 | 1.528 | 0.044 | 0.353  | 103  | 105  | 95   | -90  | -19  | 1.31E-6 | 2.49E-6   | 4.14E-6   |  |  |
| BT-549                     | 0.405 | 0.989 | 1.188                  | 0.921 | 0.911 | 0.578 | 0.031  | 134  | 88   | 87   | 30   | -92  | 3.30E-6 | 1.31E-5   | 3.37E-5   |  |  |

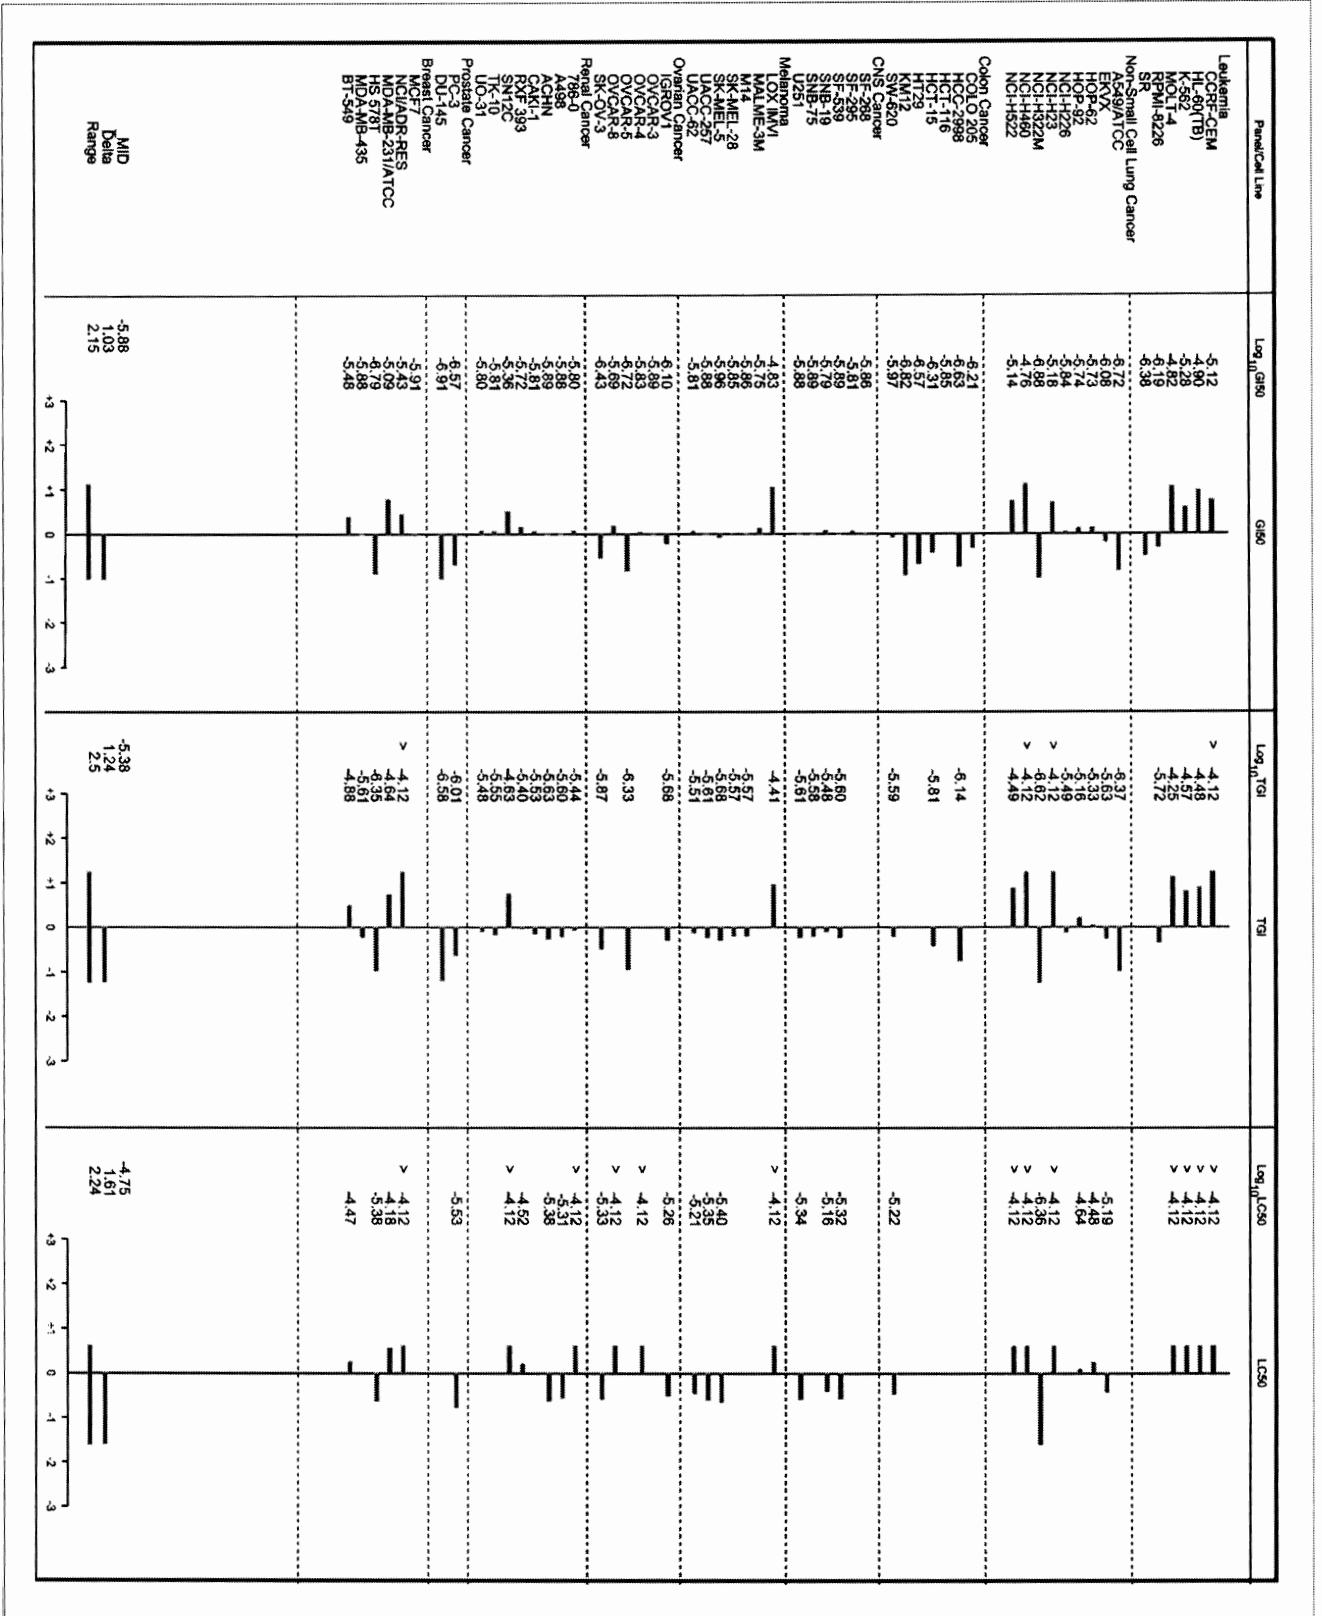

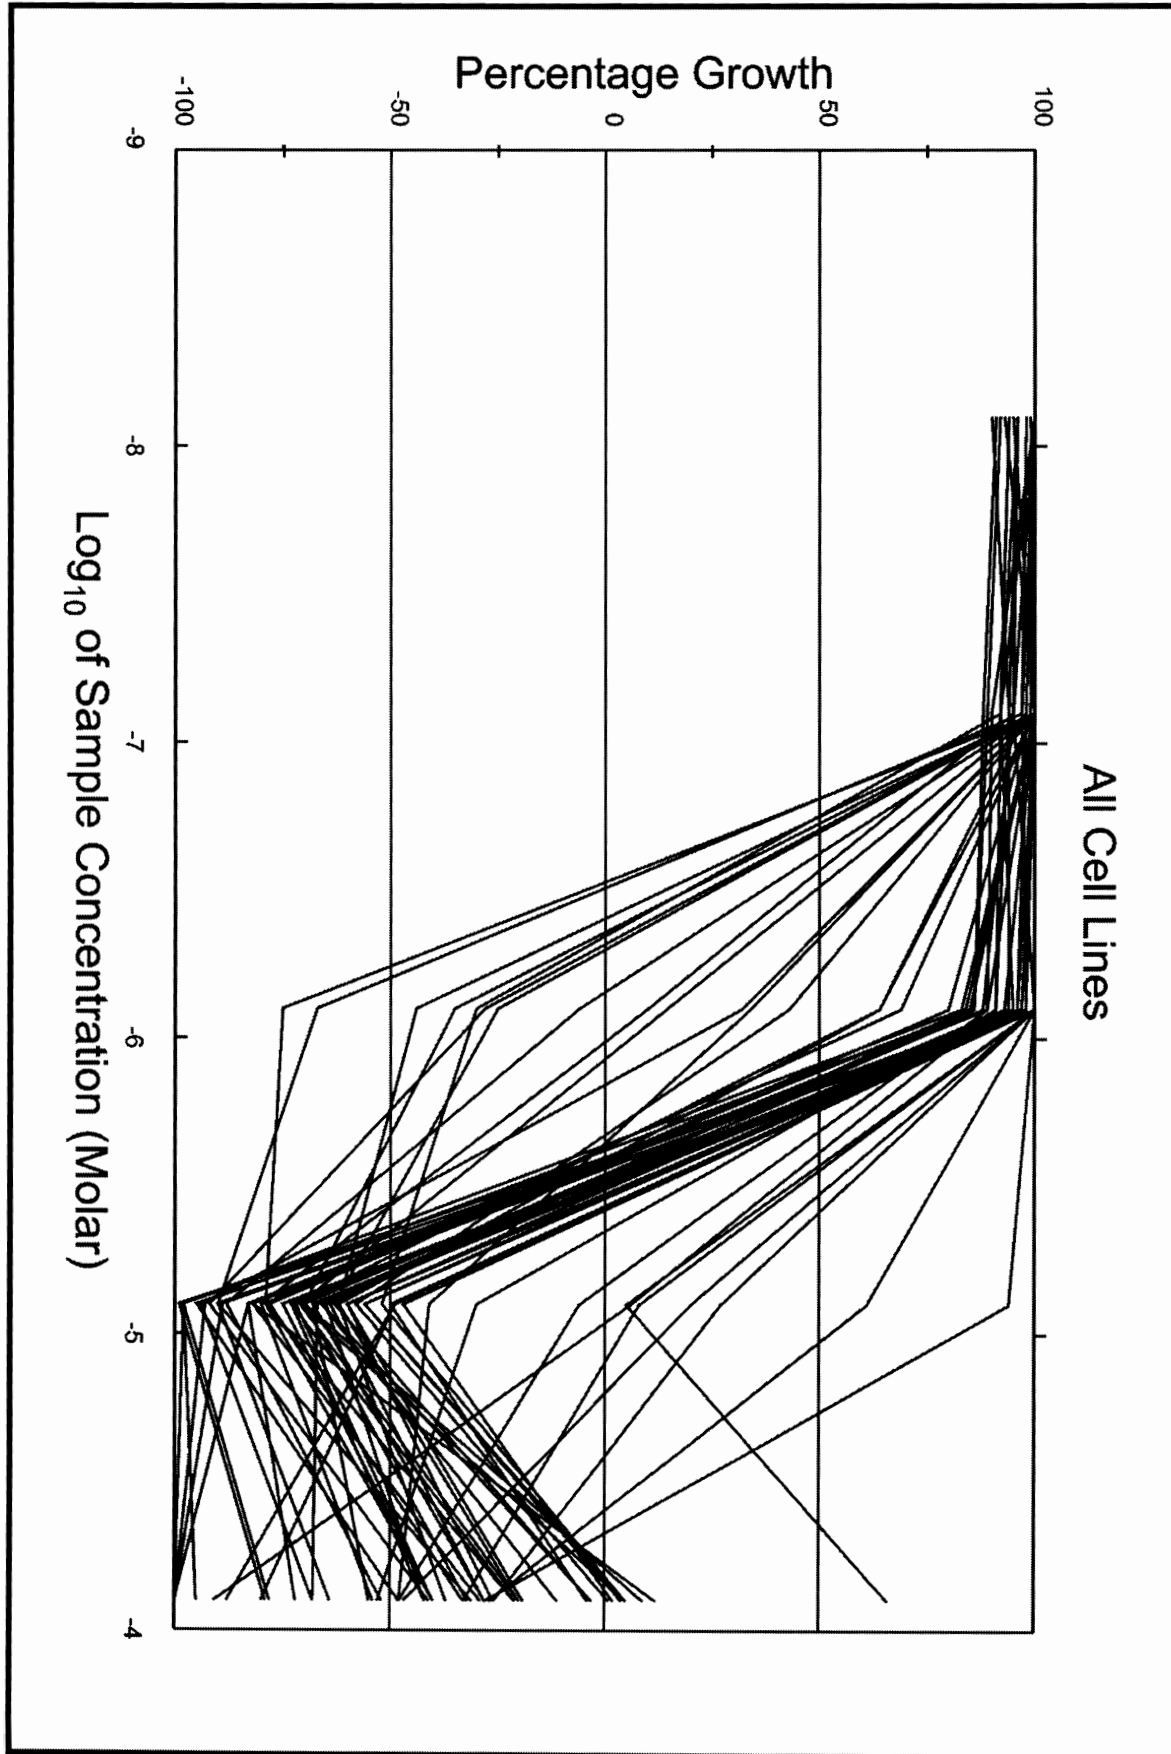



| Parent/Cell Line                  | Time  | Log10 Concentration |       |       |       |       |        |      |      |      |     | Percent Growth | GI50    | TGI       | LC50      |  |
|-----------------------------------|-------|---------------------|-------|-------|-------|-------|--------|------|------|------|-----|----------------|---------|-----------|-----------|--|
|                                   |       | Zero                | -8.1  | -7.1  | -6.1  | -5.1  | -4.1   | -3.1 | -2.1 | -1.1 | 0   |                |         |           |           |  |
| <b>Leukemia</b>                   |       |                     |       |       |       |       |        |      |      |      |     |                |         |           |           |  |
| HL-60(TB)                         | 0.495 | 1.317               | 1.459 | 1.491 | 1.548 | 0.656 | 0.261  | 117  | 121  | 128  | 20  | -47            | 3.92E-6 | 1.47E-5   | > 7.50E-5 |  |
| K-562                             | 0.612 | 2.050               | 2.217 | 2.341 | 2.373 | 0.995 | 0.454  | 112  | 120  | 122  | 27  | -26            | 4.28E-6 | 2.41E-5   | > 7.50E-5 |  |
| MOLT-4                            | 0.355 | 1.309               | 1.464 | 1.533 | 1.575 | 1.255 | 0.254  | 116  | 123  | 122  | 94  | -28            | 1.73E-5 | 4.42E-5   | > 7.50E-5 |  |
| RPW1-8226                         | 0.889 | 2.328               | 2.841 | 2.798 | 2.091 | 0.320 | 0.639  | 136  | 133  | 84   | -64 | -28            | 3.27E-6 | 2.76E-6   | > 7.50E-5 |  |
| SR                                | 0.315 | 1.230               | 1.335 | 1.513 | 1.517 | 0.388 | 0.213  | 111  | 131  | 131  | 8   | -33            | 1.42E-6 | 1.18E-5   | > 7.50E-5 |  |
| <b>Non-Small Cell Lung Cancer</b> |       |                     |       |       |       |       |        |      |      |      |     |                |         |           |           |  |
| A549/ATCC                         | 0.311 | 1.725               | 1.721 | 1.615 | 0.217 | 0.148 | 0.382  | 100  | 92   | -30  | -52 | 5              | 1.86E-7 | 2.42E-6   | .         |  |
| EAHYX                             | 0.469 | 1.358               | 1.369 | 1.338 | 1.036 | 0.181 | 0.295  | 101  | 98   | 64   | -82 | -37            | 9.67E-7 | 2.42E-6   | .         |  |
| HOP-62                            | 0.185 | 0.553               | 0.554 | 0.567 | 0.541 | 0.059 | 0.084  | 100  | 104  | 97   | -68 | -55            | 1.44E-6 | 2.89E-6   | .         |  |
| HOP-92                            | 0.918 | 1.316               | 1.324 | 1.275 | 1.272 | 0.864 | 0.102  | 102  | 90   | 89   | -6  | -48            | 1.93E-6 | 6.49E-6   | > 7.50E-5 |  |
| NCI-H226                          | 0.473 | 1.083               | 1.057 | 1.037 | 1.053 | 0.165 | 0.274  | 96   | 92   | 95   | -65 | -42            | 1.43E-6 | 2.94E-6   | .         |  |
| NCI-H23                           | 0.491 | 1.391               | 1.468 | 1.520 | 1.461 | 0.250 | 0.098  | 109  | 114  | 108  | -49 | -80            | 1.75E-6 | 3.64E-6   | .         |  |
| NCH-H322M                         | 0.554 | 1.333               | 1.332 | 1.484 | 0.137 | 0.115 | 0.334  | 100  | 117  | -75  | -79 | -40            | 1.67E-7 | 3.04E-7   | .         |  |
| NCH-H460                          | 0.236 | 1.896               | 1.968 | 2.072 | 1.988 | 0.105 | 0.304  | 105  | 111  | 106  | -56 | 4              | 1.67E-6 | 3.04E-7   | .         |  |
| NCH-H822                          | 0.854 | 2.087               | 2.178 | 2.279 | 2.253 | 1.606 | 0.621  | 107  | 116  | 114  | 61  | -27            | 1.00E-5 | 3.68E-5   | > 7.50E-5 |  |
| <b>Colon Cancer</b>               |       |                     |       |       |       |       |        |      |      |      |     |                |         |           |           |  |
| COLO 205                          | 0.211 | 0.919               | 0.981 | 0.930 | 0.214 | 0.082 | 0.247  | 109  | 102  | 102  | -71 | 5              | 2.43E-7 | 2.42E-6   | .         |  |
| HCC-2988                          | 0.549 | 1.615               | 1.666 | 1.565 | 0.656 | 0.112 | 0.252  | 105  | 95   | 10   | -80 | -54            | 2.55E-7 | 3.04E-6   | .         |  |
| HCT-116                           | 0.124 | 1.095               | 1.171 | 1.157 | 1.128 | 0.014 | -0.026 | 108  | 106  | 104  | -89 | -100           | 1.42E-6 | 2.59E-6   | .         |  |
| HCT-15                            | 0.223 | 1.512               | 1.510 | 1.528 | 0.640 | 0.015 | -0.019 | 100  | 101  | 32   | -93 | -93            | 4.18E-7 | 1.36E-6   | .         |  |
| HIT29                             | 0.168 | 1.123               | 1.186 | 1.181 | 0.109 | 0.051 | 0.255  | 107  | 106  | -35  | -70 | 9              | 1.87E-7 | 5.03E-7   | .         |  |
| KM12                              | 0.388 | 1.475               | 1.584 | 1.679 | 0.291 | 0.144 | 0.376  | 110  | 119  | 89   | -63 | -33            | 2.28E-7 | 2.42E-6   | .         |  |
| SW-620                            | 0.094 | 0.655               | 0.674 | 0.649 | 0.545 | 0.021 | 0.063  | 103  | 99   | 80   | -78 | -33            | 1.17E-6 | 2.42E-6   | .         |  |
| <b>CNS Cancer</b>                 |       |                     |       |       |       |       |        |      |      |      |     |                |         |           |           |  |
| SF-268                            | 0.364 | 1.169               | 1.238 | 1.285 | 1.192 | 0.125 | 0.354  | 109  | 112  | 102  | -66 | -3             | 1.52E-6 | 3.04E-6   | .         |  |
| SF-295                            | 0.478 | 1.311               | 1.277 | 1.271 | 1.209 | 0.144 | 0.324  | 96   | 96   | 88   | -70 | -31            | 1.30E-6 | 2.70E-6   | .         |  |
| SF-539                            | 0.385 | 1.324               | 1.366 | 1.301 | 1.289 | 0.037 | 0.264  | 105  | 98   | 96   | -90 | -4             | 1.33E-6 | 2.48E-6   | .         |  |
| SNB-19                            | 0.725 | 1.093               | 1.153 | 1.142 | 0.979 | 0.248 | 0.479  | 103  | 111  | 112  | -50 | -21            | 1.80E-6 | 3.68E-6   | .         |  |
| SNB-75                            | 0.247 | 1.261               | 1.284 | 1.288 | 1.098 | 0.151 | 0.575  | 116  | 113  | 69   | -79 | -78            | 1.01E-6 | 2.19E-6   | .         |  |
| U251                              | 0.620 | 2.257               | 2.300 | 2.214 | 2.222 | 0.010 | 0.055  | 100  | 104  | 83   | -98 | -78            | 1.14E-6 | 2.19E-6   | .         |  |
| <b>Melanoma</b>                   |       |                     |       |       |       |       |        |      |      |      |     |                |         |           |           |  |
| LOX IMVI                          | 0.193 | 1.301               | 1.329 | 1.384 | 1.356 | 0.099 | 0.024  | 103  | 106  | 106  | -49 | -89            | 1.72E-6 | 3.63E-6   | 8.10E-6   |  |
| MALME-3M                          | 0.484 | 0.804               | 0.853 | 0.861 | 0.827 | 0.166 | 0.432  | 115  | 118  | 107  | -66 | -11            | 1.81E-6 | 3.13E-6   | .         |  |
| M14                               | 0.350 | 1.086               | 1.113 | 1.238 | 1.157 | 0.004 | 0.075  | 102  | 110  | 108  | -89 | -79            | 1.43E-6 | 4.35E-6   | .         |  |
| SK-MEL-2                          | 0.662 | 1.243               | 1.297 | 1.300 | 1.297 | 0.268 | 0.538  | 109  | 110  | 109  | -80 | -12            | 1.68E-6 | 3.33E-6   | .         |  |
| SK-MEL-28                         | 0.254 | 0.737               | 0.771 | 0.764 | 0.685 | 0.046 | 0.310  | 107  | 106  | 89   | -82 | -12            | 1.27E-6 | 2.28E-6   | 4.29E-6   |  |
| SK-MEL-5                          | 0.234 | 1.432               | 1.321 | 1.293 | 1.267 | 0.015 | 0.076  | 91   | 88   | 86   | -94 | -88            | 1.19E-6 | 2.28E-6   | 4.29E-6   |  |
| UACC-257                          | 1.047 | 2.222               | 2.204 | 2.240 | 2.200 | 0.286 | 0.827  | 99   | 102  | 98   | -73 | -21            | 1.44E-6 | 2.62E-6   | .         |  |
| UACC-62                           | 0.620 | 2.257               | 2.300 | 2.214 | 2.222 | 0.010 | -0.062 | 103  | 97   | 98   | -98 | -100           | 1.31E-6 | 2.36E-6   | 4.25E-6   |  |
| <b>Ovarian Cancer</b>             |       |                     |       |       |       |       |        |      |      |      |     |                |         |           |           |  |
| IGROV1                            | 0.818 | 1.969               | 2.099 | 2.082 | 1.558 | 0.230 | 0.493  | 111  | 110  | 64   | -72 | -40            | 9.55E-7 | 2.22E-6   | .         |  |
| OVCA9-3                           | 0.406 | 0.761               | 0.784 | 0.809 | 0.738 | 0.120 | 0.327  | 106  | 113  | 93   | -71 | -20            | 1.38E-6 | 2.79E-6   | .         |  |
| OVCA9-4                           | 0.443 | 1.041               | 1.066 | 1.117 | 0.701 | 0.186 | 0.447  | 104  | 113  | 43   | -58 | 1              | 5.98E-7 | 2.40E-6   | 4.77E-6   |  |
| OVCA9-5                           | 0.366 | 0.854               | 0.867 | 0.966 | 0.781 | 0.062 | 0.102  | 109  | 123  | 85   | -83 | -72            | 1.21E-6 | 2.40E-6   | 4.77E-6   |  |
| OVCA9-8                           | 0.099 | 0.591               | 0.531 | 0.482 | 0.521 | 0.386 | 0.107  | 107  | 95   | 105  | 5   | 66             | 2.23E-7 | > 7.50E-5 | .         |  |
| SK-OV-3                           | 0.651 | 1.411               | 1.479 | 1.585 | 0.468 | 0.050 | 0.386  | 109  | 120  | -28  | -92 | -41            | 2.23E-7 | 4.88E-7   | > 7.50E-5 |  |
| <b>Renal Cancer</b>               |       |                     |       |       |       |       |        |      |      |      |     |                |         |           |           |  |
| 785-D                             | 0.322 | 1.332               | 1.368 | 1.406 | 1.361 | 0.017 | 0.186  | 103  | 107  | 103  | -95 | -48            | 1.39E-6 | 2.48E-6   | 4.89E-6   |  |
| A498                              | 1.109 | 1.751               | 1.750 | 1.741 | 1.729 | 0.166 | -0.052 | 100  | 99   | 96   | -83 | -100           | 1.36E-6 | 2.57E-6   | 4.89E-6   |  |
| ACHN                              | 0.204 | 0.852               | 0.845 | 0.894 | 0.857 | 0.005 | 0.071  | 99   | 107  | 98   | -86 | -85            | 1.32E-6 | 2.37E-6   | 4.27E-6   |  |
| CAMA-1                            | 0.399 | 0.495               | 0.505 | 0.554 | 0.529 | 0.126 | 0.288  | 110  | 161  | 135  | -68 | -28            | 1.97E-6 | 3.46E-6   | .         |  |
| RFC-393                           | 0.768 | 1.388               | 1.353 | 1.337 | 1.335 | 0.540 | 0.369  | 94   | 92   | 91   | -30 | -53            | 1.65E-6 | 4.28E-6   | 5.42E-5   |  |
| SN12C                             | 0.613 | 2.728               | 2.567 | 2.486 | 2.433 | 0.203 | 0.199  | 92   | 89   | 86   | -67 | -88            | 2.74E-6 | 2.74E-6   | 5.82E-6   |  |
| TK-10                             | 0.656 | 1.303               | 1.258 | 1.413 | 1.370 | 0.196 | 0.393  | 93   | 117  | 110  | -75 | -40            | 1.29E-6 | 2.96E-6   | .         |  |
| UC-31                             | 0.525 | 1.515               | 1.551 | 1.589 | 1.513 | 0.144 | 0.306  | 104  | 104  | 100  | -73 | -42            | 1.46E-6 | 2.84E-6   | .         |  |
| <b>Prostate Cancer</b>            |       |                     |       |       |       |       |        |      |      |      |     |                |         |           |           |  |
| PC-3                              | 0.356 | 1.055               | 1.061 | 1.068 | 0.336 | 0.043 | 0.171  | 101  | 102  | -6   | -88 | -52            | 2.28E-7 | 6.65E-7   | 2.59E-6   |  |
| DU-145                            | 0.220 | 0.909               | 0.894 | 0.886 | 0.072 | 0.022 | 0.079  | 98   | 97   | -67  | -90 | -64            | 1.44E-7 | 2.92E-7   | 5.88E-7   |  |
| <b>Breast Cancer</b>              |       |                     |       |       |       |       |        |      |      |      |     |                |         |           |           |  |
| MCF7                              | 0.287 | 1.702               | 1.841 | 1.777 | 1.683 | 0.127 | 0.365  | 110  | 105  | 97   | -56 | 5              | 1.53E-6 | .         | > 7.50E-5 |  |
| MDA-MDR-RES                       | 0.406 | 1.399               | 1.527 | 1.430 | 1.454 | 0.217 | 0.427  | 113  | 103  | 106  | -47 | 2              | 1.74E-6 | 8.70E-6   | > 7.50E-5 |  |
| MDA-MB-231(ATCC)                  | 0.377 | 1.096               | 1.067 | 1.051 | 1.034 | 0.422 | 0.035  | 96   | 94   | 91   | 6   | -48            | 2.30E-6 | 2.88E-5   | > 7.50E-5 |  |
| HS 578T                           | 0.426 | 0.884               | 0.882 | 0.883 | 0.582 | 0.221 | 0.221  | 95   | 100  | 94   | -41 | -48            | 1.47E-7 | 2.13E-6   | > 7.50E-5 |  |
| MDA-MB-435                        | 0.475 | 1.553               | 1.623 | 1.638 | 1.514 | 0.287 | 0.338  | 108  | 108  | 94   | -82 | -29            | 2.61E-6 | 3.08E-6   | .         |  |
| BT-549                            | 0.377 | 0.810               | 0.765 | 0.783 | 0.782 | 0.151 | 0.281  | 90   | 94   | 94   | -80 | -26            | 1.44E-6 | 3.08E-6   | .         |  |
| T-47D                             | 0.627 | 1.303               | 1.334 | 1.400 | 0.348 | 0.238 | 0.500  | 105  | 114  | -44  | -82 | -20            | 1.91E-7 | 3.94E-7   | .         |  |

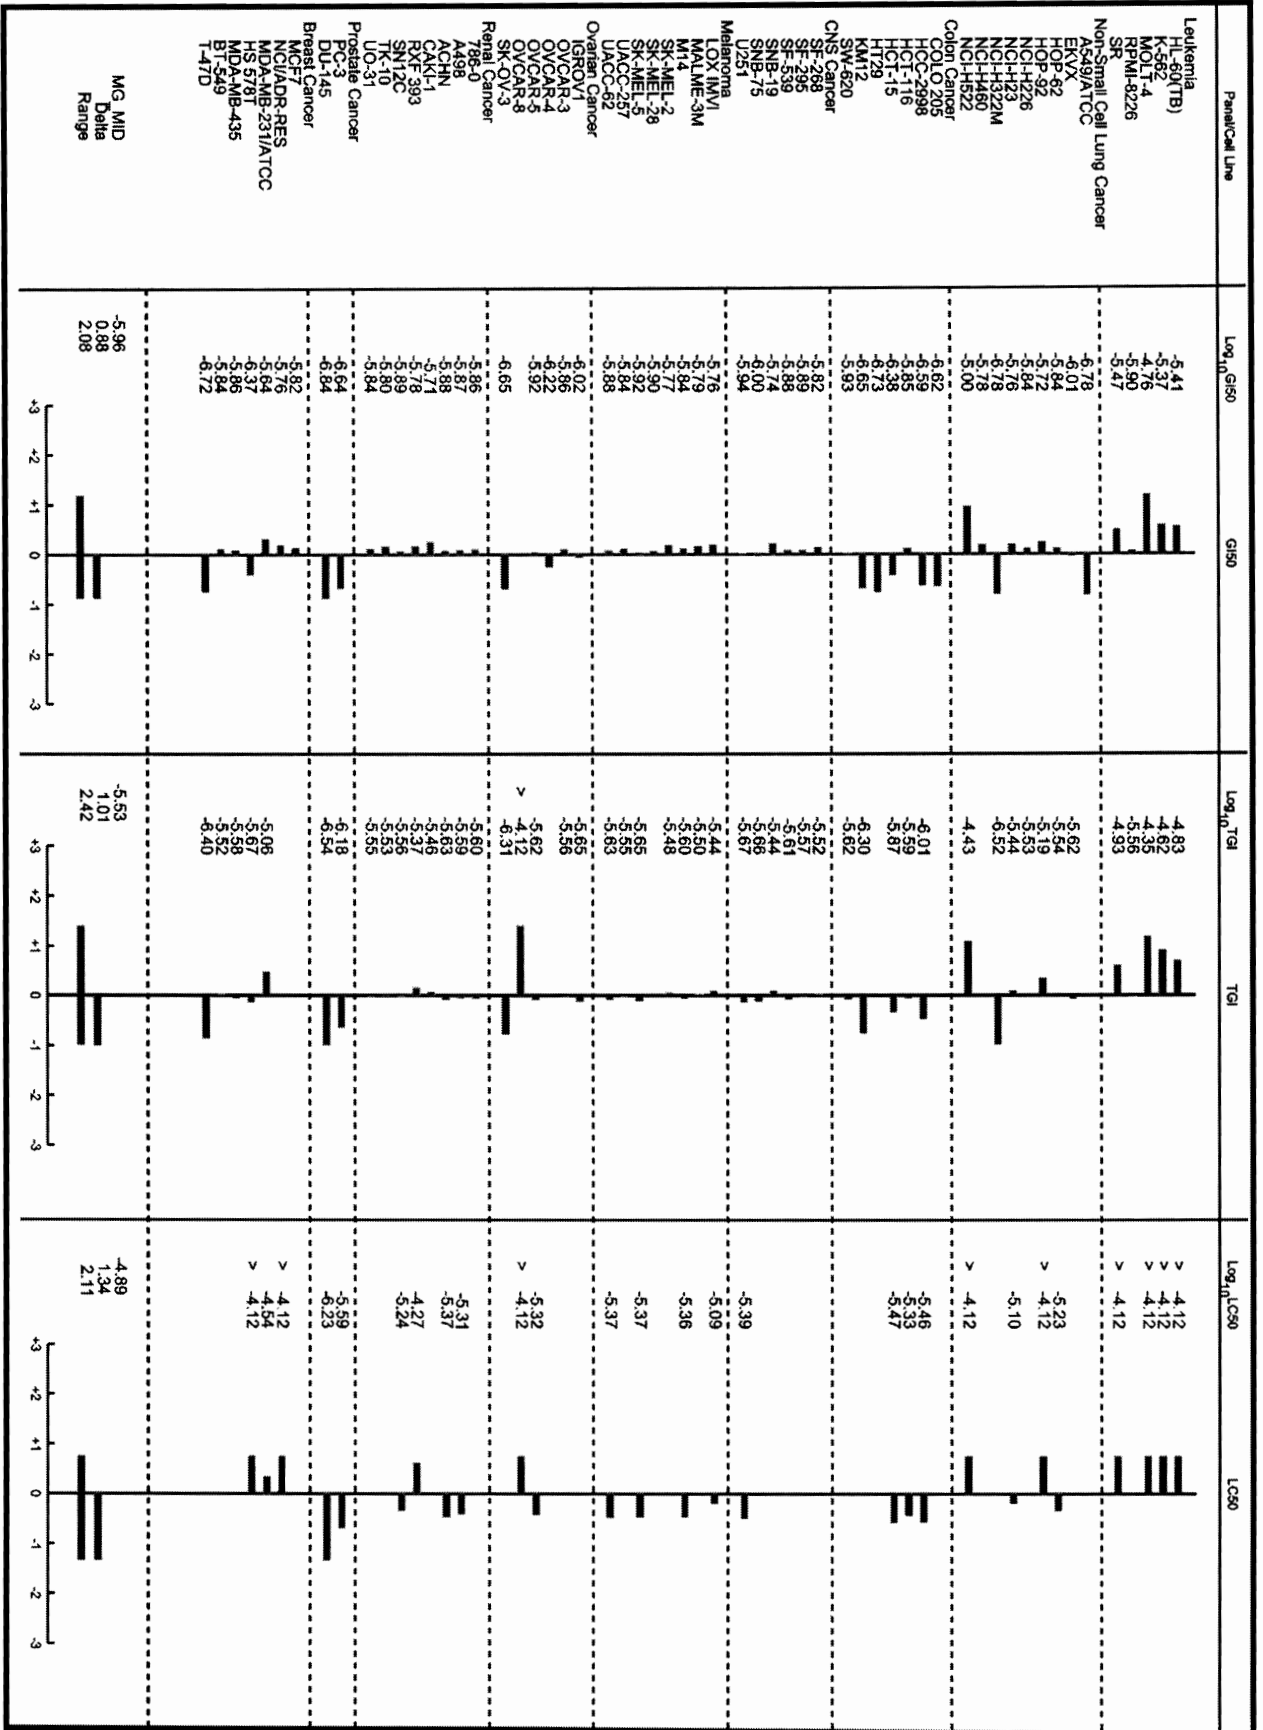



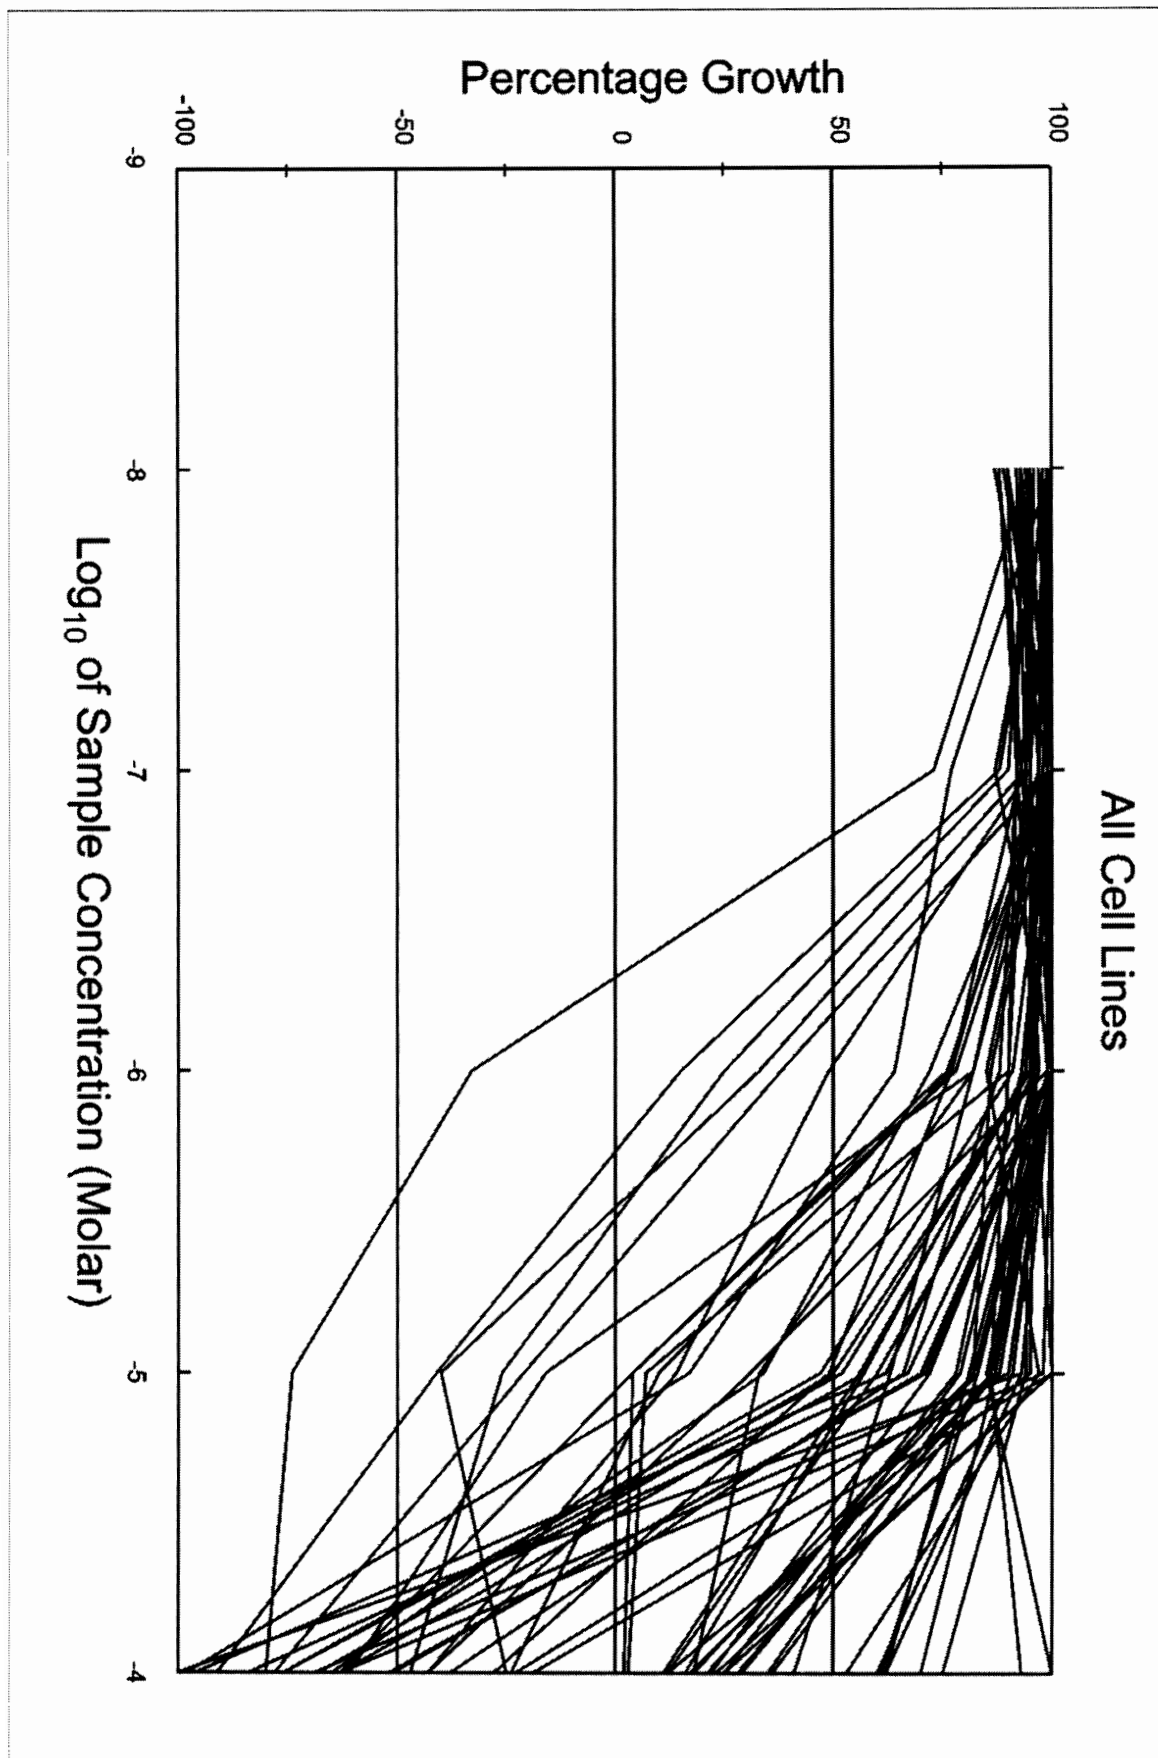

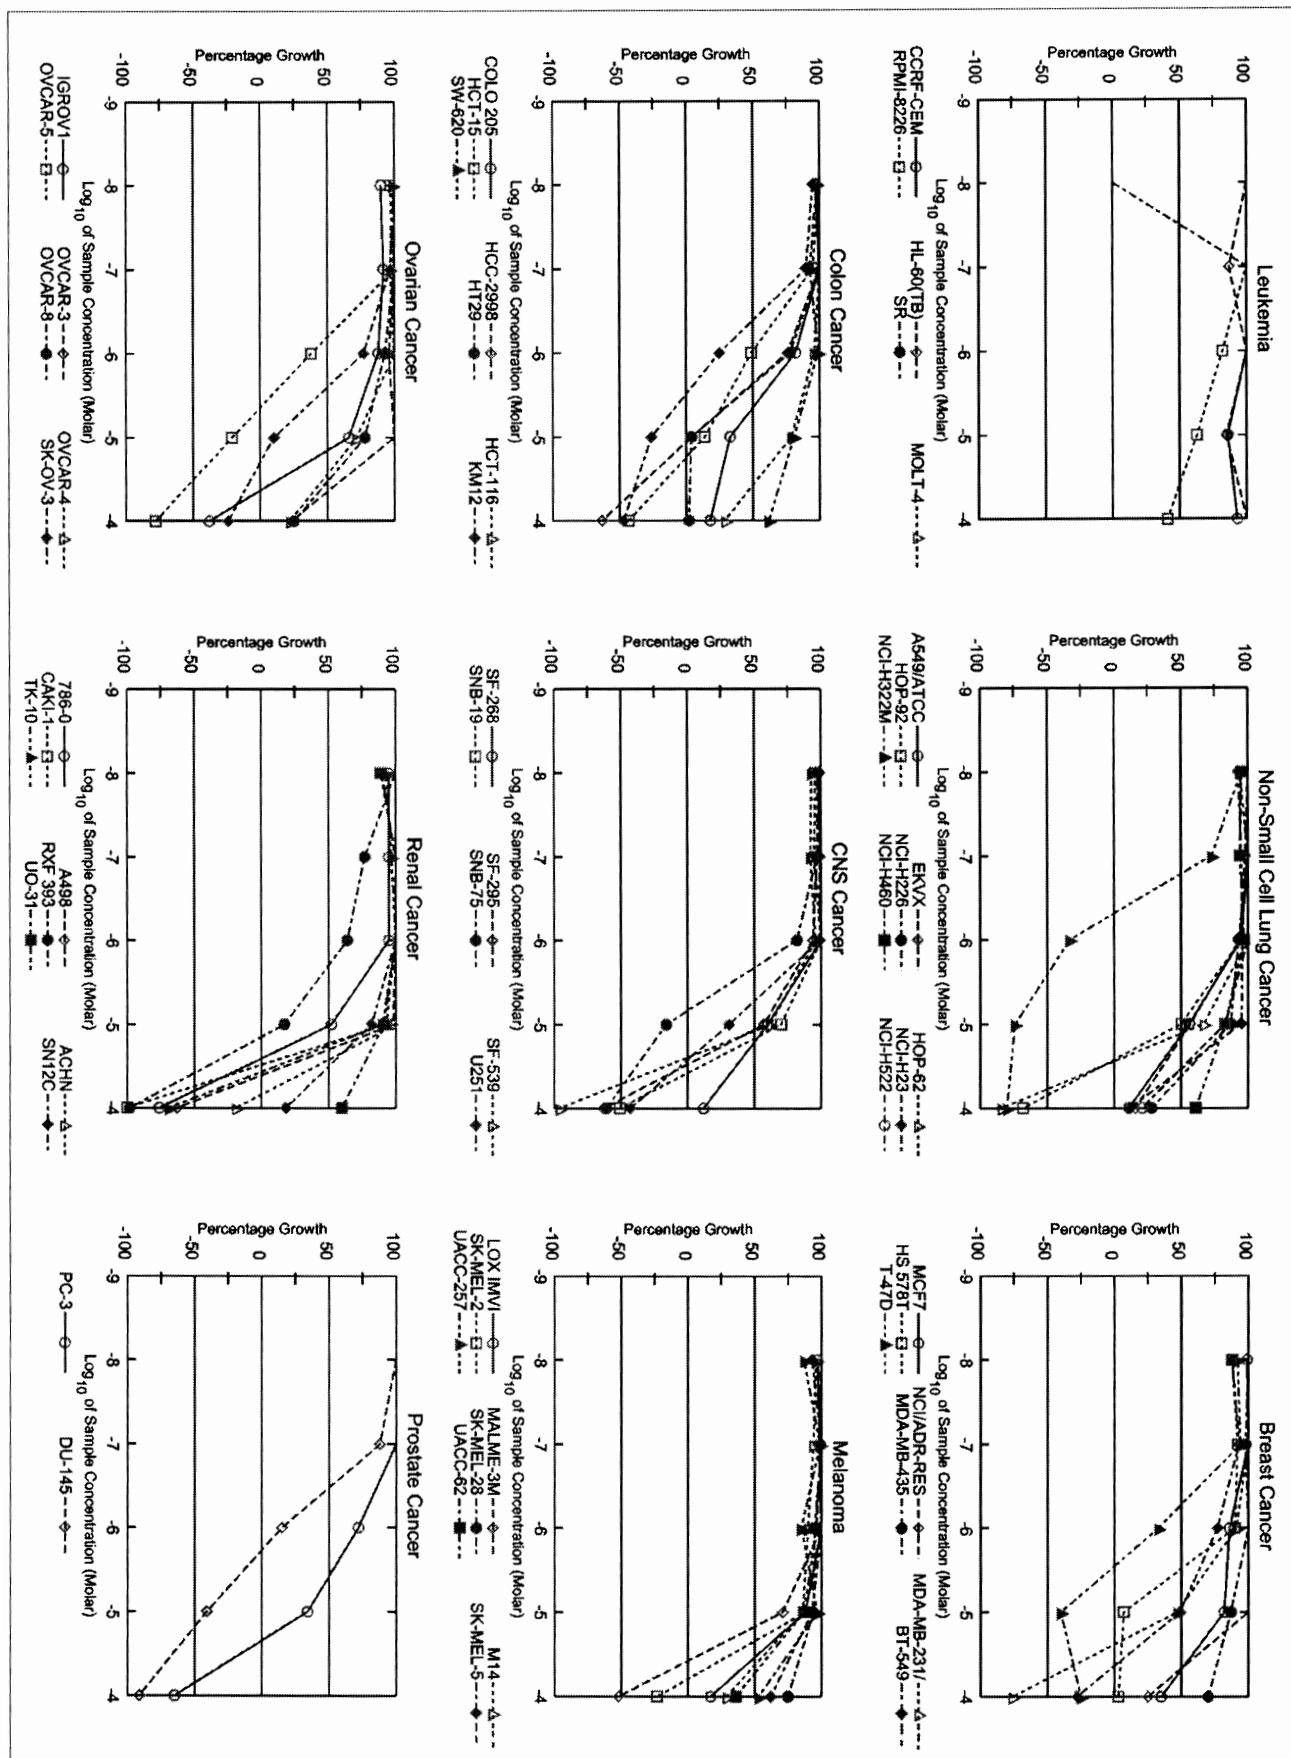



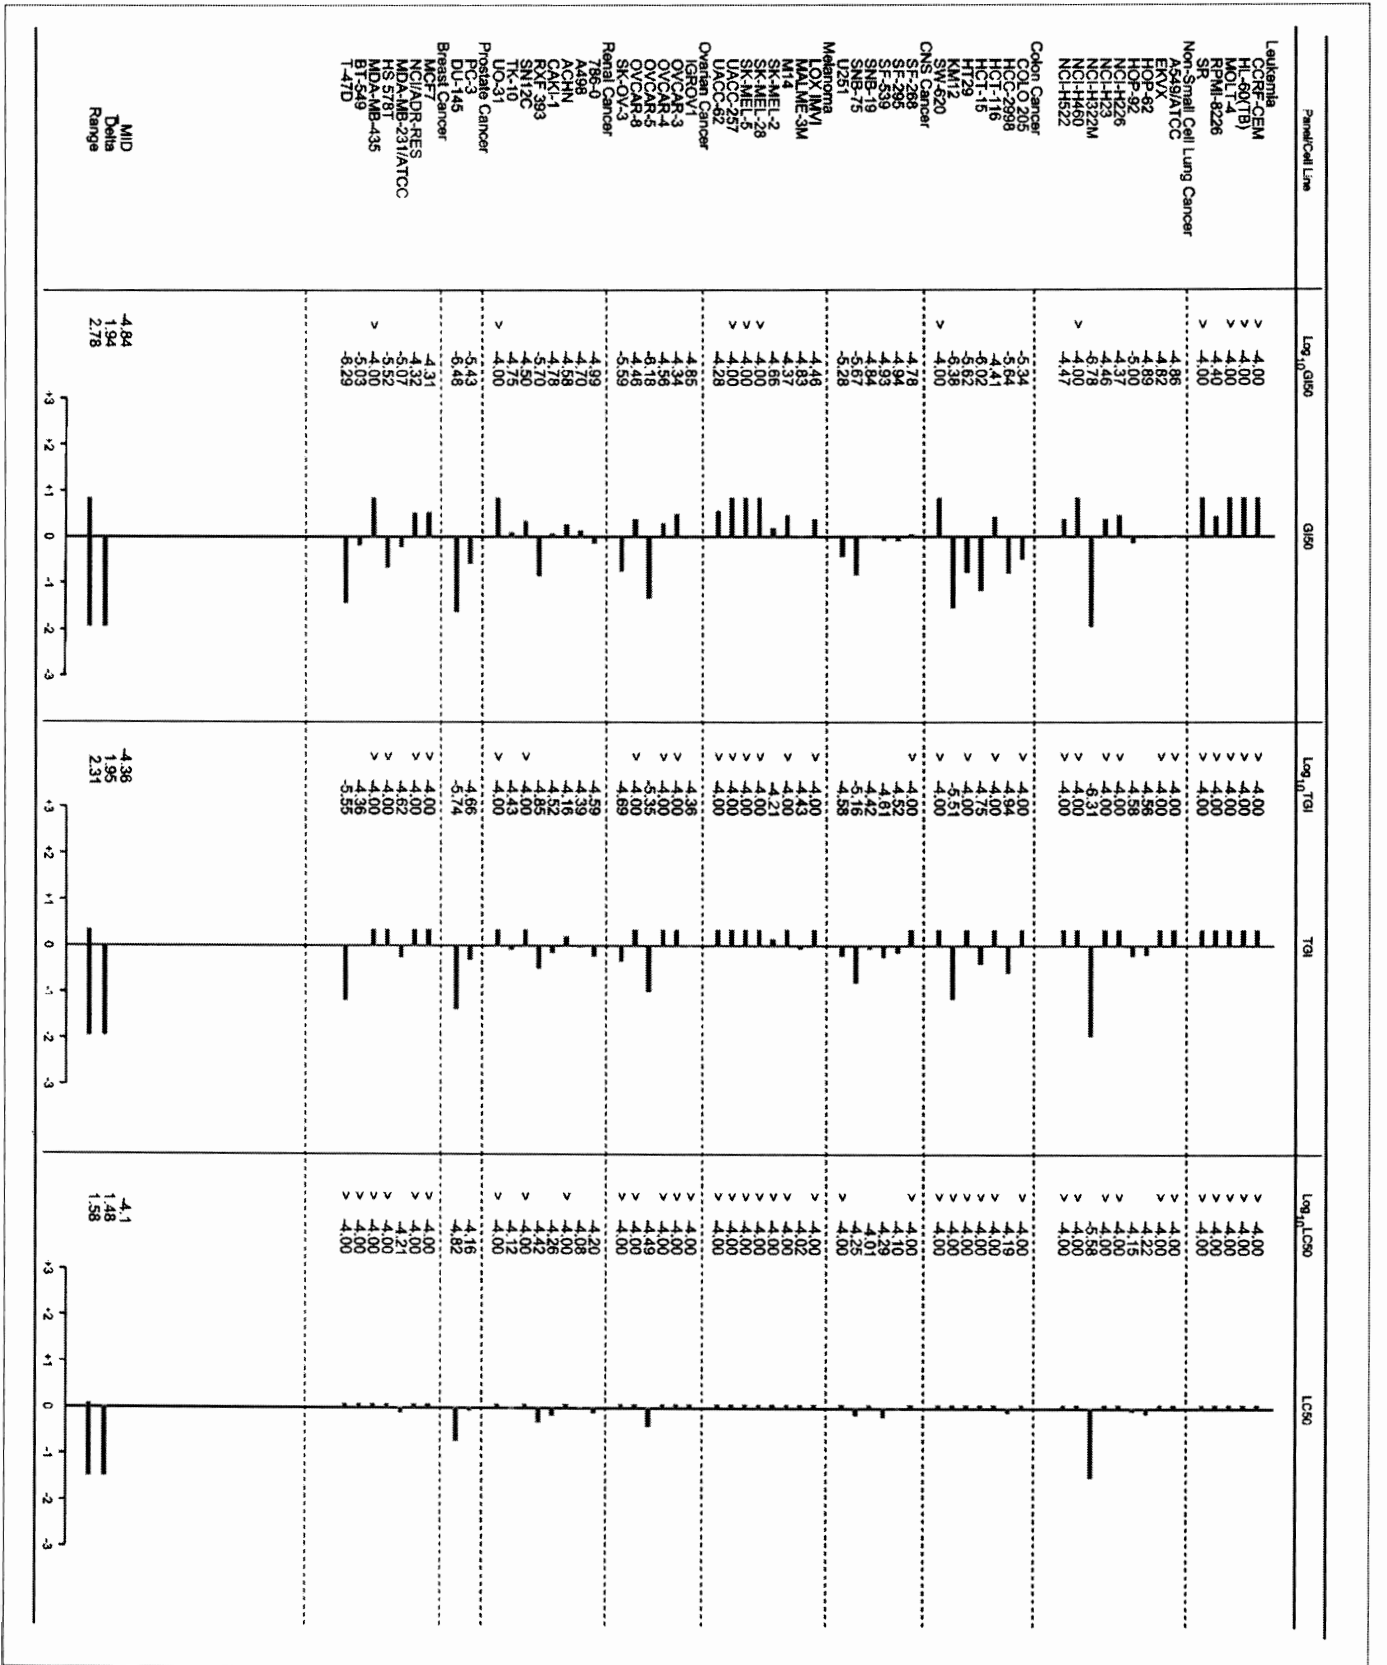

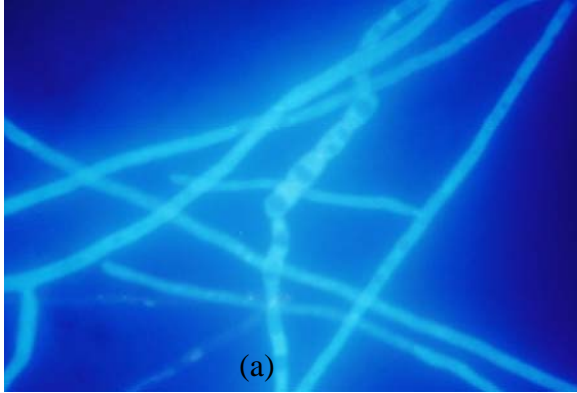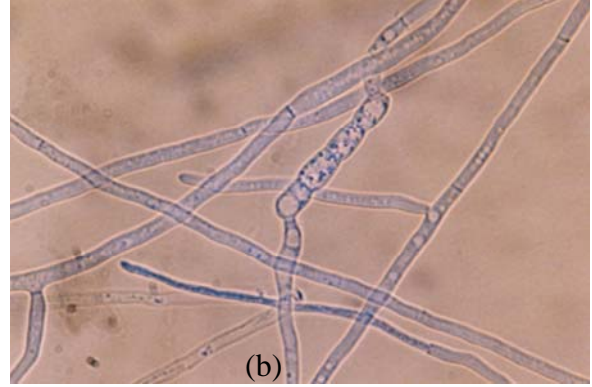

Mycelia of *F. solani* after exposure with coumarine (a) under fluorescence microscope (b) under light microscope

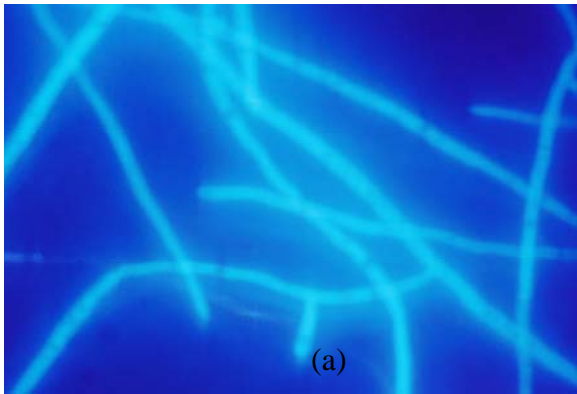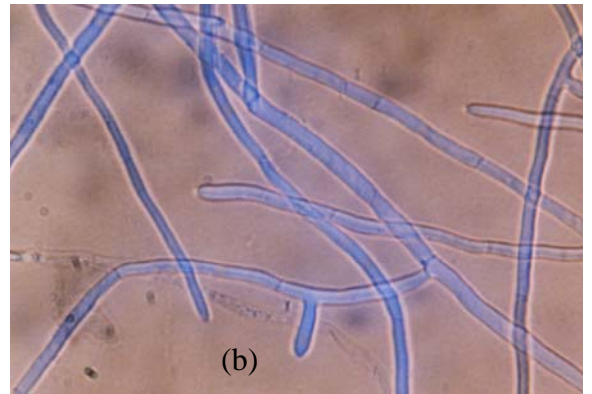

Mycelia of *F. oxysporium* after exposure with coumarine (a). under fluorescence microscope (b) under light microscope

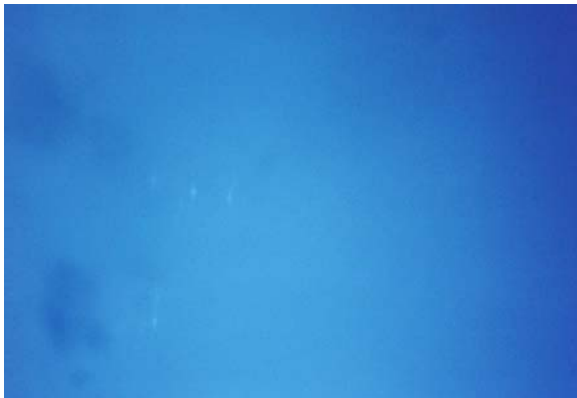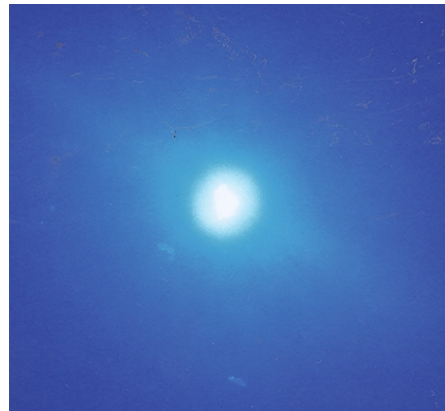

Mycelia untreated with fluorescence compound under fluorescence microscope: no autofluorescence has been observed

KF-coumarine under fluorescence microscope

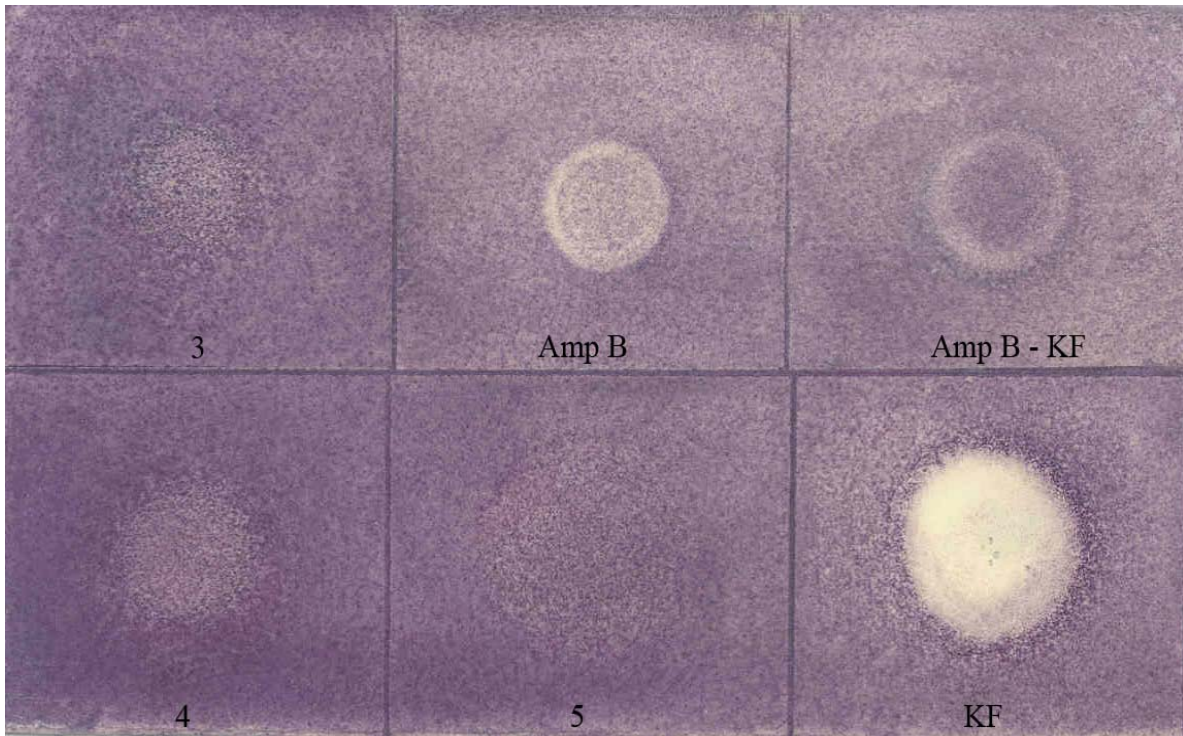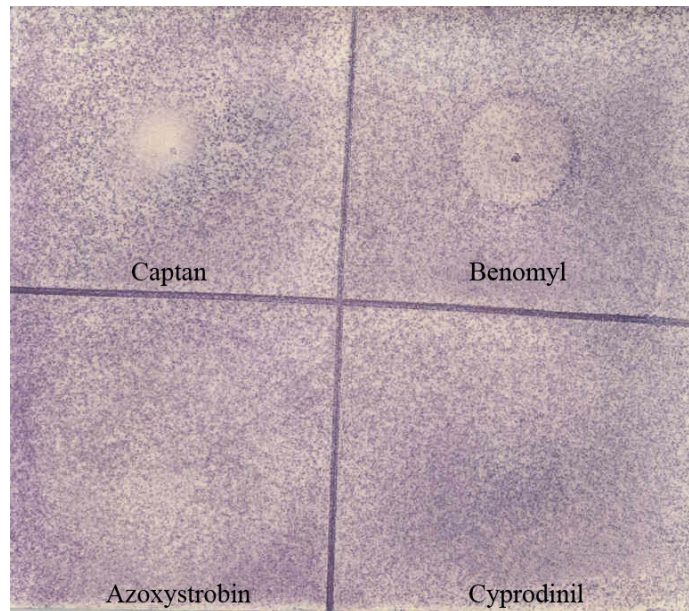

Bioautography plate of **3**, **4** and **5** against *Fusarium solani* after spraying with MTT.

Standards: Amp B: amphotericin B, AmpB-KF: Amphotericin B plus KF (1:1), Captan, Benomyl, Azoxystrobin and Cyprodinil.

Control : KF: kahalalide F.

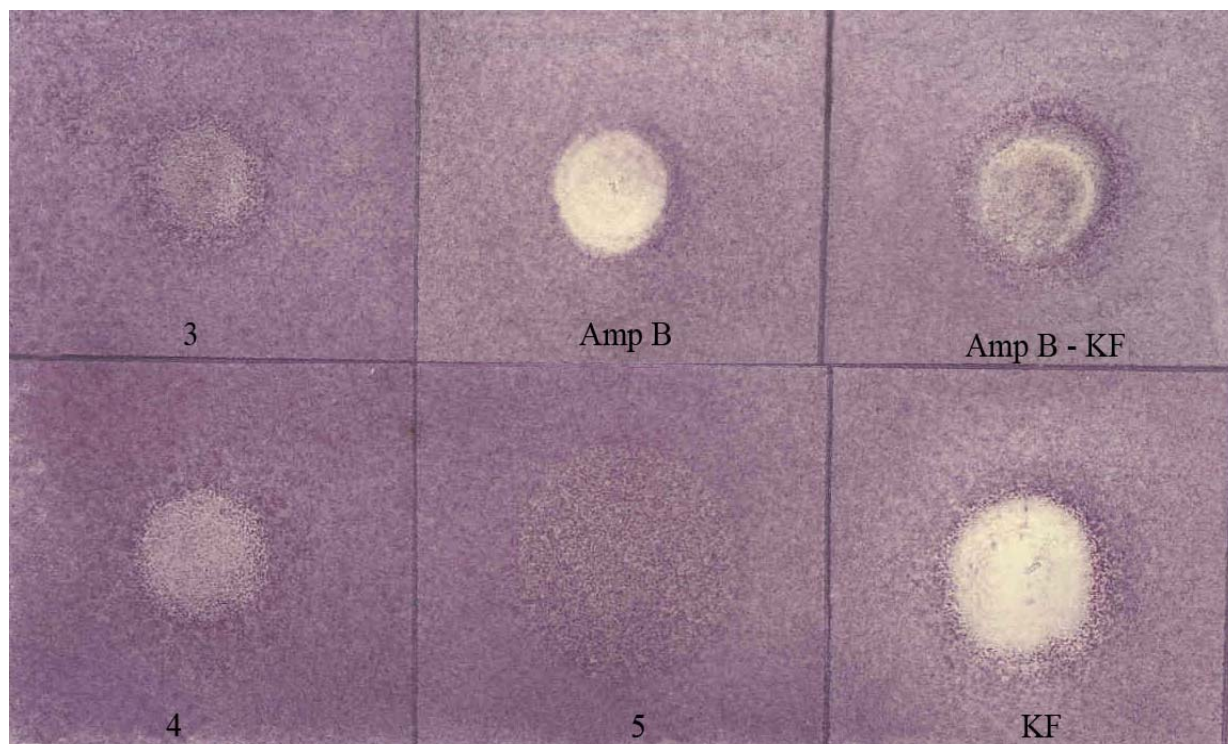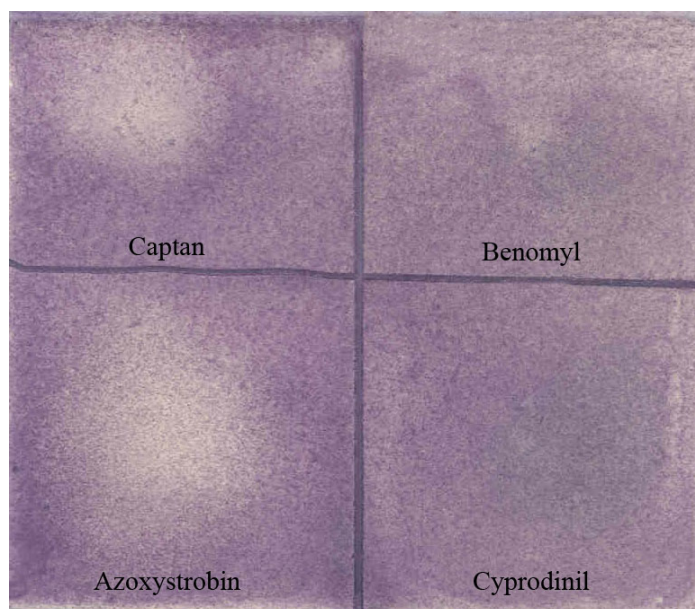

Bioautography plate of **3**, **4** and **5** against *Fusarium oxysporium* after spraying with MTT.

Standards: Amp B: amphotericin B, AmpB-KF: Amphotericin B plus KF (1:1), Captan, Benomyl, Azoxystrobin and Cyprodinil.

Control : KF: kahalalide F.

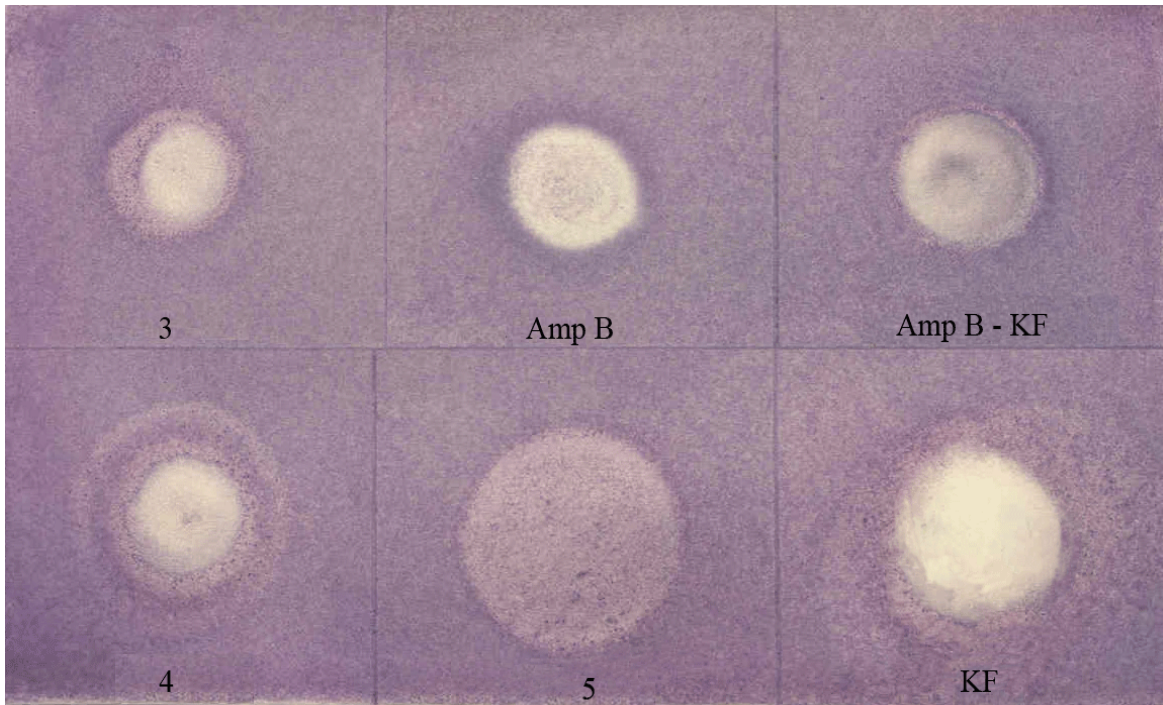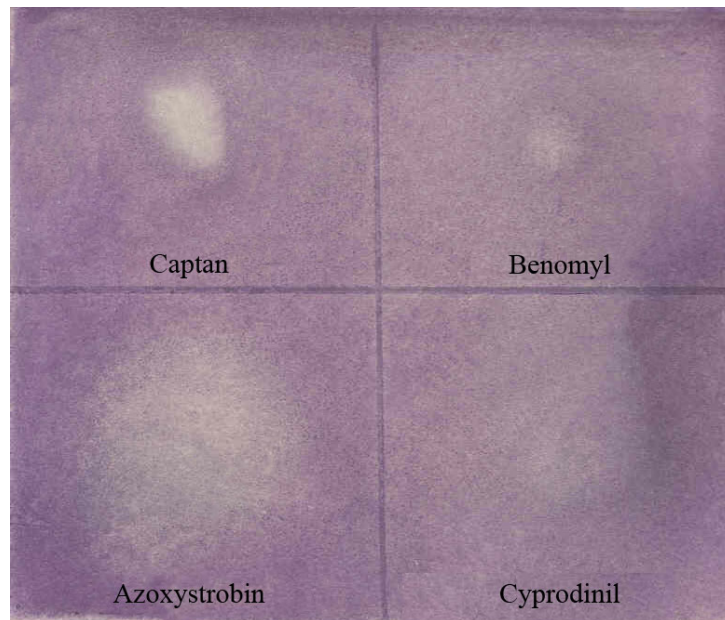

Bioautography plate of **3**, **4** and **5** against *Fusarium proliferatum* after spraying with MTT.

Standards: Amp B: amphotericin B, AmpB-KF: Amphotericin B plus KF (1:1), Captan, Benomyl, Azoxystrobin and Cyprodinil.

Control : KF: kahalalide F.
